# Supplementary material for: Dual role of BrCF2CO2Et: difluorocarbene-enabled access to α-trifluoromethyl ketones from sulfoxonium ylides
Source: Royal Society of Chemistry journal article supplement (doi:10.1039/d3qo00609c), 2023-01-01

*Supporting Information*

**The dual role of BrCF<sub>2</sub>CO<sub>2</sub>Et: difluorocarbene-enabled  
access to  $\alpha$ -trifluoromethyl ketones from sulfoxonium  
ylides**

*Chun-Yan Wu,<sup>a</sup> Xiang-Long Chen,<sup>a</sup> Huai-Yu Wang,<sup>a</sup> Dong-Sheng Yang,<sup>a</sup> Shi-Yi*

*Zhuang,<sup>a</sup> You Zhou,<sup>a</sup> Zhi-Cheng Yu,<sup>a</sup> Yan-Dong Wu,<sup>a</sup> Xiao Geng<sup>\*b</sup>, and An-Xin Wu<sup>\*a</sup>*

<sup>a</sup>Key Laboratory of Pesticide & Chemical Biology, Ministry of Education, College of Chemistry, Central China Normal University, Wuhan 430079, P. R. China.

<sup>b</sup>Advanced Research Institute and School of Pharmaceutical Sciences, Taizhou University, Jiaojiang, Zhejiang, 318000, P. R. China.

E-mail: chwuax@mail.ccn.edu.cn.

xiaogeng\_@tzc.edu.cn

| <b>Table of Contents</b>                                            | <b>page</b> |
|---------------------------------------------------------------------|-------------|
| 1.General information .....                                         | S2          |
| 2.General procedure for the synthesis of <b>3</b> .....             | S2          |
| 3. Optimization of the reaction conditions .....                    | S2-S3       |
| 4. Characterization data for compounds in mechanistic study .....   | S3-S5       |
| 5.Characterization data for compounds .....                         | S5-S17      |
| 6. Crystallographic data and molecular structure of <b>3i</b> ..... | S18         |
| 7.References .....                                                  | S18         |
| 8.NMR spectra of compounds .....                                    | S19-S78     |

## 1. General information

All substrates and reagents were commercially available and used without further purification. TLC analysis was performed using pre-coated glass plates. Column chromatography was performed using silica gel (200–300 mesh).  $^1\text{H}$  spectra were recorded in  $\text{CDCl}_3$  on 600/400 MHz NMR spectrometers and resonances ( $\delta$ ) are given in parts per million relative to tetramethylsilane. Data are reported as follows: chemical shift, multiplicity (s = singlet, d = doublet, t = triplet, m = multiplet), coupling constants (Hz) and integration.  $^{13}\text{C}$  spectra were recorded in  $\text{CDCl}_3$  on 150/100 MHz NMR spectrometers and resonances ( $\delta$ ) are given in ppm. HRMS were obtained on a Bruker 7-tesla FT-ICR MS equipped with an electrospray source. The X-ray crystal-structure determinations were obtained on a Bruker SMART APEX CCD system. Sulfoxonium ylides **1** were known compounds, and prepared according to the reported procedures.<sup>1</sup>  $\text{BrCF}_2\text{COOEt}$  was commercially available and used without further purification.

## 2. General procedure for the synthesis of **3**

A 25 mL Schlenk-type tube (with a Teflon screw cap and a side arm) equipped with a magnetic stir bar was charged with the mixture of sulfoxonium ylide (1 mmol),  $\text{BrCF}_2\text{COOEt}$  (3 mmol),  $\text{K}_2\text{CO}_3$  (2 mmol) and  $\text{H}_2\text{O}$  (0.5 mmol) in NMP (10 mL). The mixture was stirred at 70 °C for 5 hours. After cooling to room temperature, the mixture was quenched with water (25 mL), extracted with EtOAc ( $3 \times 50$  mL), the combined organic layers were washed with brine, dried over anhydrous  $\text{Na}_2\text{SO}_4$  and concentrated under reduced pressure. The crude product was purified by column chromatography on silica gel (eluent: PE/EtOAc) to afford the products.

## 3. Optimization of the reaction conditions

Table S1. The influence of solvents

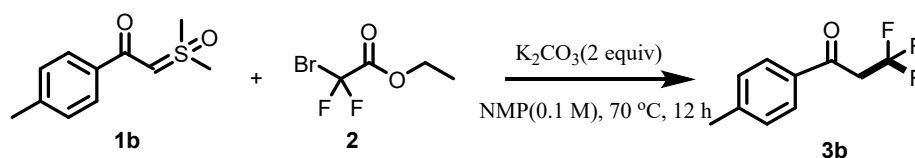

| entry | solvent <sup>a</sup>   | yields <sup>b</sup> |
|-------|------------------------|---------------------|
| 1     | NMP                    | 50%                 |
| 2     | $\text{CH}_3\text{CN}$ | 12%                 |
| 3     | THF                    | 20%                 |
| 4     | DMSO                   | 10%                 |
| 5     | DMF                    | 15%                 |

<sup>a</sup>Standard conditions: reactions were carried out with **1b** (1 equiv.), **2** (2 equiv.) and  $\text{K}_2\text{CO}_3$  (2 equiv.) in NMP (0.1 M) at 70 °C for 12 h. <sup>b</sup>Isolated yields.

**Table S2.** The influence of protonic additives

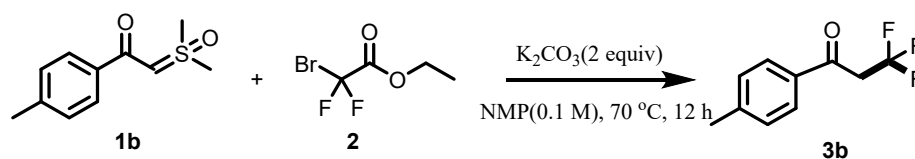

| entry | protonic additives <sup>a</sup>      | Yields <sup>b</sup> |
|-------|--------------------------------------|---------------------|
| 1     | EtOH                                 | 56%                 |
| 2     | MeOH                                 | 60%                 |
| 3     | HFIP                                 | 36%                 |
| 4     | <i>n</i> -BuOH                       | 34%                 |
| 5     | <i>i</i> -PrOH                       | 12%                 |
| 6     | HOCH <sub>2</sub> CH <sub>2</sub> OH | 63%                 |
| 7     | H <sub>2</sub> O                     | <b>68%</b>          |

<sup>a</sup>Standard conditions: reactions were carried out with **1b** (1 equiv.), **2** (3 equiv.) and K<sub>2</sub>CO<sub>3</sub> (2 equiv.) in NMP (0.1 M) at 70 °C for 5 h. <sup>b</sup>Isolated yields.

#### 4. Characterization data for compounds in mechanistic study

The deuterium labeling experiment

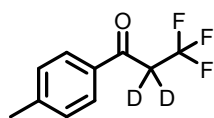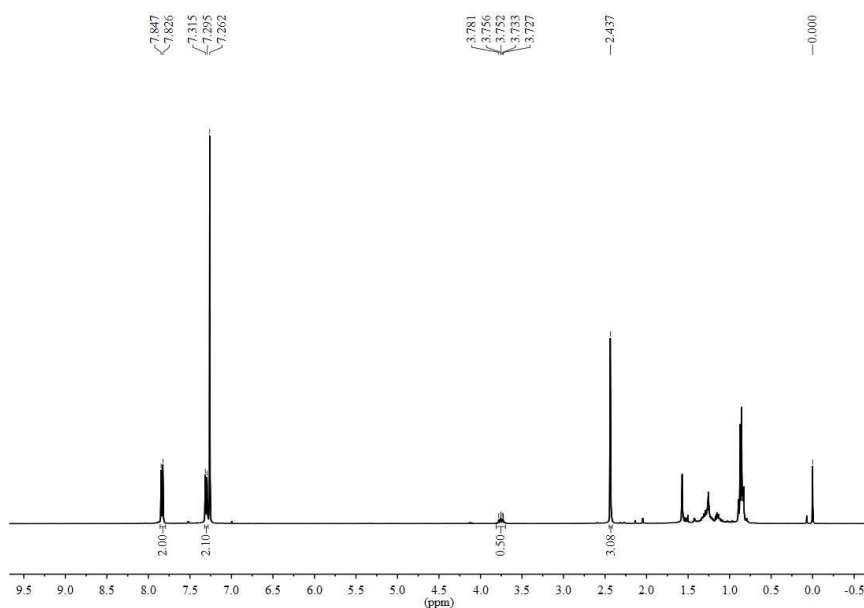

compound **13**

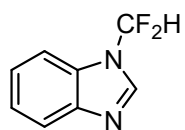

$^1\text{H}$  NMR (400 MHz,  $\text{CDCl}_3$ ) of compound **13**

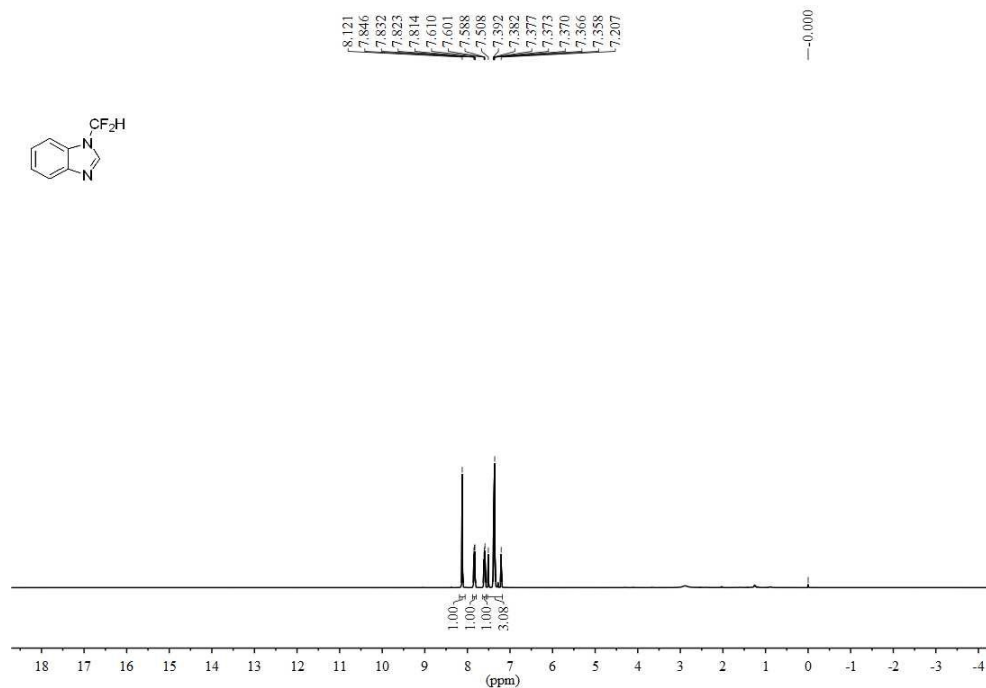

$^{13}\text{C}\{^1\text{H}\}$  NMR (100 MHz,  $\text{CDCl}_3$ ) of compound **13**

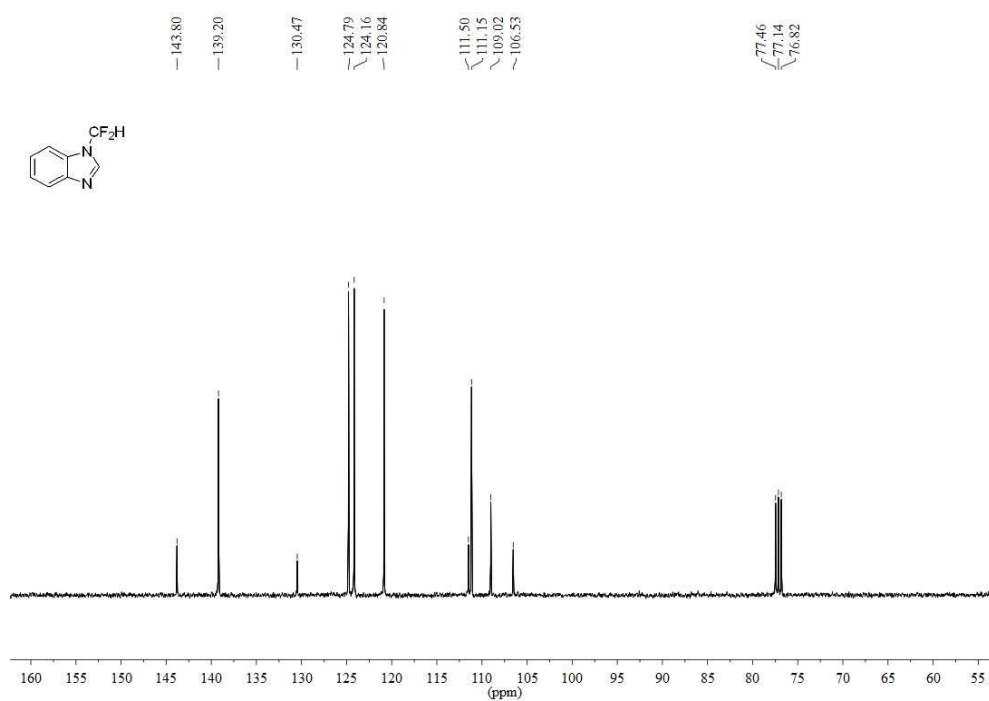

$^{19}\text{F}$  NMR (376 MHz,  $\text{CDCl}_3$ ) of compound **13**

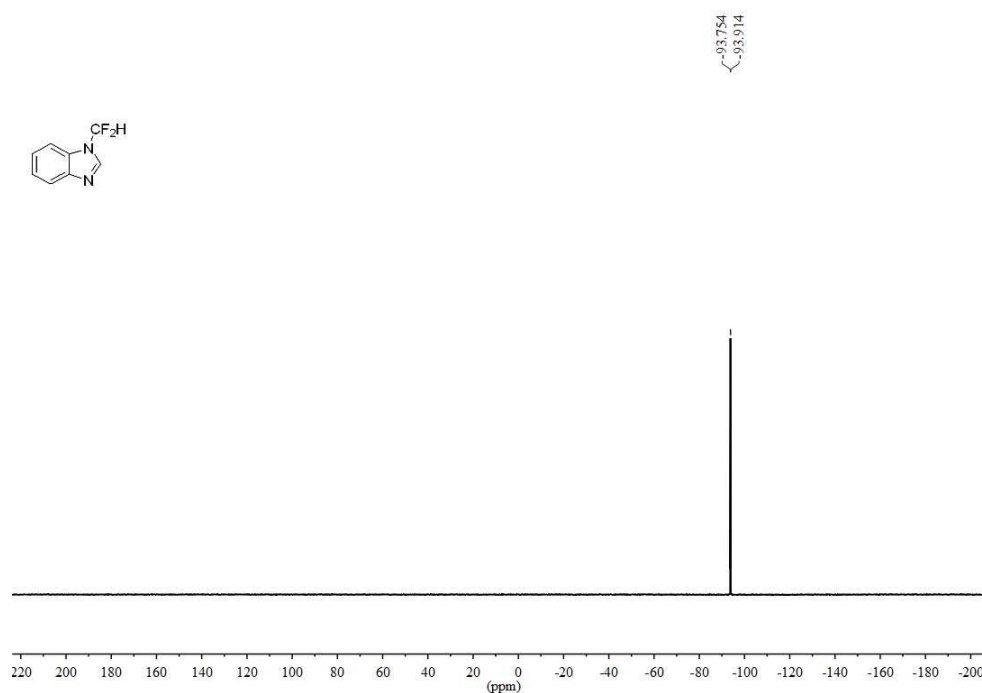

**1-(difluoromethyl)-1H-benzodimidazole (13)**

$^1\text{H}$  NMR (400 MHz,  $\text{CDCl}_3$ )  $\delta$  8.12 (s, 1H), 7.83 (dd,  $J = 8.0, 4.8$  Hz, 1H), 7.64–7.56 (m, 1H), 7.53–7.18 (m, 3H).  $^{13}\text{C}$  NMR (100 MHz,  $\text{CDCl}_3$ )  $\delta$  143.7, 139.1, 130.3, 124.7, 124.0, 120.7, 111.0, 108.9(t,  $J = 248.0$  Hz,  $^1J_{\text{CF}}$ ).  $^{19}\text{F}$  NMR (376 MHz,  $\text{CDCl}_3$ )  $\delta$  -97.8.

**5. Characterization data for compounds**

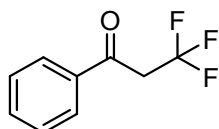

**3,3,3-trifluoro-1-phenylpropan-1-one (3a):**

Yield 73%; 137.0 mg; yellow solid; mp 55-56 °C; TLC (PE:EtOAc, 100:1 v/v): Rf= 0.2;  $^1\text{H}$  NMR (400 MHz,  $\text{CDCl}_3$ )  $\delta$  7.94 (d,  $J = 7.6$  Hz, 2H), 7.64 (t,  $J = 7.6$  Hz, 1H), 7.51 (t,  $J = 7.6$  Hz, 2H), 3.81 (q,  $J = 10.0$  Hz, 2H).  $^{13}\text{C}$  NMR (100 MHz,  $\text{CDCl}_3$ )  $\delta$  189.7(q,  $J = 3.0$  Hz,  $^3J_{\text{CF}}$ ), 135.7(q,  $J = 1.0$  Hz,  $^4J_{\text{CF}}$ ), 134.3, 129.0(q,  $J = 275.0$  Hz,  $^1J_{\text{CF}}$ ), 124.0, 42.141.8(q,  $J = 28.0$  Hz,  $^2J_{\text{CF}}$ ).  $^{19}\text{F}$  NMR (376 MHz,  $\text{CDCl}_3$ )  $\delta$  -62.05. HRMS (ESI)  $m/z$  calcd for  $\text{C}_9\text{H}_7\text{F}_3\text{ONa}^+$  ( $\text{M}+\text{Na}$ ) $^+$  211.0341, found 211.0343.

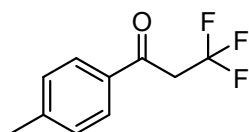

**3,3,3-trifluoro-1-(p-tolyl)propan-1-one (3b):**

Yield 75%; 151 mg; white solid; mp 51-52 °C; TLC (PE:EtOAc, 100:1 v/v): Rf= 0.3;  $^1\text{H}$  NMR (400 MHz,  $\text{CDCl}_3$ )  $\delta$  7.83 (d,  $J = 8.0$  Hz, 2H), 7.29 (d,  $J = 8.0$  Hz, 2H), 3.76 (q,  $J =$

10.0 Hz, 2H), 2.43 (s, 3H).  $^{13}\text{C}$  NMR (100 MHz,  $\text{CDCl}_3$ )  $\delta$  189.3(q,  $J = 3.0$  Hz,  $^3J_{\text{CF}}$ ), 145.3, 133.3(q,  $J = 2.0$  Hz,  $^4J_{\text{CF}}$ ), 129.6, 128.4, 124.1(q,  $J = 275.0$  Hz,  $^1J_{\text{CF}}$ ), 41.9(q,  $J = 28.0$  Hz,  $^2J_{\text{CF}}$ ), 21.6.  $^{19}\text{F}$  NMR (376 MHz,  $\text{CDCl}_3$ )  $\delta$  -62.03. HRMS (ESI)  $m/z$  calcd for  $\text{C}_{10}\text{H}_{10}\text{F}_3\text{O}^+$  ( $\text{M}+\text{H}$ ) $^+$  203.0678, found 203.0676.

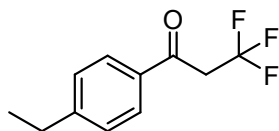

**1-(4-ethylphenyl)-3,3,3-trifluoropropan-1-one (3c)**

Yield 74%; 160 mg; yellow oil; TLC (PE:EtOAc, 100:1 v/v):  $R_f = 0.2$ ;  $^1\text{H}$  NMR (400 MHz,  $\text{CDCl}_3$ )  $\delta$  7.86 (d,  $J = 8.4$  Hz, 2H), 7.32 (d,  $J = 8.0$  Hz, 2H), 3.77 (q,  $J = 10.0$  Hz, 2H), 2.72 (q,  $J = 7.6$  Hz, 2H), 1.26 (t,  $J = 7.6$  Hz, 3H).  $^{13}\text{C}$  NMR (100 MHz,  $\text{CDCl}_3$ )  $\delta$  189.3(q,  $J = 3.0$  Hz,  $^3J_{\text{CF}}$ ), 151.4, 133.5(q,  $J = 1.0$  Hz,  $^4J_{\text{CF}}$ ), 128.6, 128.4, 124.1(q,  $J = 275.0$  Hz,  $^1J_{\text{CF}}$ ), 41.9(q,  $J = 28.0$  Hz,  $^2J_{\text{CF}}$ ), 28.9, 15.0.  $^{19}\text{F}$  NMR (376 MHz,  $\text{CDCl}_3$ )  $\delta$  -62.03. HRMS (ESI)  $m/z$  calcd for  $\text{C}_{11}\text{H}_{11}\text{F}_3\text{ONa}^+$  ( $\text{M}+\text{Na}$ ) $^+$  239.0654, found 239.0651.

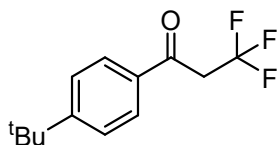

**1-(4-(tert-butyl)phenyl)-3,3,3-trifluoropropan-1-one (3d):**

Yield 70%; 170 mg; yellow oil; TLC (PE:EtOAc, 100:1 v/v):  $R_f = 0.2$ ;  $^1\text{H}$  NMR (400 MHz,  $\text{CDCl}_3$ )  $\delta$  8.11–7.76 (m, 2H), 7.67–7.37 (m, 2H), 3.82 (q,  $J = 10.0$  Hz, 2H), 1.61–1.22 (m, 10H).  $^{13}\text{C}$  NMR (100 MHz,  $\text{CDCl}_3$ )  $\delta$  189.4, 158.2, 133.4, 128.4, 125.9, 124.1(q,  $J = 276.0$  Hz,  $^1J_{\text{CF}}$ ), 41.9(q,  $J = 28.0$  Hz,  $^2J_{\text{CF}}$ ), 35.3, 31.0.  $^{19}\text{F}$  NMR (376 MHz,  $\text{CDCl}_3$ )  $\delta$  -61.97.

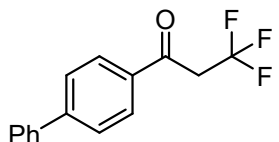

**1-([1,1'-biphenyl]-4-yl)-3,3,3-trifluoropropan-1-one (3e):**

Yield 69%; 182 mg; yellow solid; mp 120–122  $^\circ\text{C}$ ; TLC (PE:EtOAc, 100:1 v/v):  $R_f = 0.2$ ;  $^1\text{H}$  NMR (400 MHz,  $\text{CDCl}_3$ )  $\delta$  8.00 (d,  $J = 8.4$  Hz, 2H), 7.71 (d,  $J = 8.4$  Hz, 2H), 7.62 (d,  $J = 7.2$  Hz, 2H), 7.48 (t,  $J = 7.2$  Hz, 2H), 7.43 (d,  $J = 7.2$  Hz, 1H), 3.82 (q,  $J = 10.0$  Hz, 2H).  $^{13}\text{C}$  NMR (100 MHz,  $\text{CDCl}_3$ )  $\delta$  189.3(q,  $J = 3.0$  Hz,  $^3J_{\text{CF}}$ ), 146.8, 139.3, 134.4(q,  $J = 2.0$  Hz,  $^4J_{\text{CF}}$ ), 129.02, 128.96, 128.6, 127.5, 127.3, 124.0(q,  $J = 276.0$  Hz,  $^1J_{\text{CF}}$ ), 42.0(q,  $J = 28.0$  Hz,  $^2J_{\text{CF}}$ ).  $^{19}\text{F}$  NMR (376 MHz,  $\text{CDCl}_3$ )  $\delta$  -62.51. HRMS (ESI)  $m/z$  calcd for  $\text{C}_{15}\text{H}_{11}\text{F}_3\text{ONa}^+$  ( $\text{M}+\text{Na}$ ) $^+$  287.0654, found 287.0656.

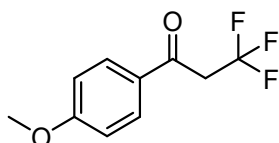

**3,3,3-trifluoro-1-(4-methoxyphenyl)propan-1-one (3f):**

Yield 67%; 146 mg; white solid; mp 50-51 °C; TLC (PE:EtOAc, 100:1 v/v): R<sub>f</sub>= 0.1; <sup>1</sup>H NMR (400 MHz, CDCl<sub>3</sub>) δ 7.90 (d, *J* = 8.8 Hz, 2H), 6.96 (d, *J* = 8.8 Hz, 2H), 3.88 (s, 3H), 3.74 (q, *J* = 10.0 Hz, 2H). <sup>13</sup>C NMR (100 MHz, CDCl<sub>3</sub>) δ 188.12(q, *J* = 3.0 Hz, <sup>3</sup>*J*<sub>CF</sub>), 164.3, 130.7, 128.8(q, *J* = 1.0 Hz, <sup>4</sup>*J*<sub>CF</sub>), 124.2(q, *J* = 306.0 Hz, <sup>1</sup>*J*<sub>CF</sub>), 114.0, 55.5, 41.6(q, *J* = 28.0 Hz, <sup>2</sup>*J*<sub>CF</sub>). <sup>19</sup>F NMR (376 MHz, CDCl<sub>3</sub>) δ -62.01. HRMS (ESI) *m/z* calcd for C<sub>10</sub>H<sub>9</sub>F<sub>3</sub>O<sub>2</sub>Na<sup>+</sup> (M+Na)<sup>+</sup> 241.0447, found 241.0443.

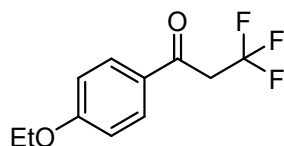

**1-(4-ethoxyphenyl)-3,3,3-trifluoropropan-1-one (3g):**

Yield 64%; 149 mg; yellow solid; mp 56-57 °C; TLC (PE:EtOAc, 50:1 v/v): R<sub>f</sub>= 0.2; <sup>1</sup>H NMR (400 MHz, CDCl<sub>3</sub>) δ 7.89 (d, *J* = 8.8 Hz, 2H), 6.94 (d, *J* = 8.8 Hz, 2H), 4.11 (q, *J* = 7.2 Hz, 2H), 3.73 (q, *J* = 10.0 Hz, 2H), 1.45 (t, *J* = 7.2 Hz, 3H); <sup>13</sup>C NMR (100 MHz, CDCl<sub>3</sub>) δ 188.1(q, *J* = 3.0 Hz, <sup>3</sup>*J*<sub>CF</sub>), 163.8, 130.8, 128.67(q, *J* = 1.0 Hz, <sup>4</sup>*J*<sub>CF</sub>), 124.2(q, *J* = 275.0 Hz, <sup>1</sup>*J*<sub>CF</sub>), 114.4, 63.9, 41.6(q, *J* = 28.0 Hz, <sup>2</sup>*J*<sub>CF</sub>), 14.5. <sup>19</sup>F NMR (376 MHz, CDCl<sub>3</sub>) δ -61.99. HRMS (ESI) *m/z* calcd for C<sub>11</sub>H<sub>12</sub>F<sub>3</sub>O<sub>2</sub><sup>+</sup> (M+H)<sup>+</sup> 233.0784, found 233.0781.

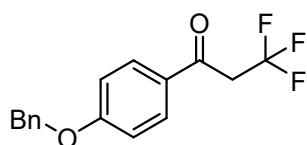

**1-(4-(benzyloxy)phenyl)-3,3,3-trifluoropropan-1-one (3h):**

Yield 73%; 214 mg; white solid; mp 118-120 °C; TLC (PE:EtOAc, 50:1 v/v): R<sub>f</sub>= 0.2; <sup>1</sup>H NMR (400 MHz, CDCl<sub>3</sub>) δ 7.89 (d, *J* = 8.8 Hz, 2H), 7.38 (m, 5H), 7.02 (d, *J* = 8.8 Hz, 2H), 5.12 (s, 2H), 3.71 (q, *J* = 10.0 Hz, 2H). <sup>13</sup>C NMR (100 MHz, CDCl<sub>3</sub>) δ 188.1(q, *J* = 2.0 Hz, <sup>3</sup>*J*<sub>CF</sub>), 163.4, 135.8, 130.8, 129.0, 128.7, 128.3, 127.4, 124.1(q, *J* = 275.0 Hz, <sup>1</sup>*J*<sub>CF</sub>), 114.8, 70.2, 41.7(q, *J* = 28.0 Hz, <sup>2</sup>*J*<sub>CF</sub>). <sup>19</sup>F NMR (376 MHz, CDCl<sub>3</sub>) δ -61.90. HRMS (ESI) *m/z* calcd for C<sub>16</sub>H<sub>13</sub>F<sub>3</sub>O<sub>2</sub>Na<sup>+</sup> (M+Na)<sup>+</sup> 317.0760, found 317.0758.

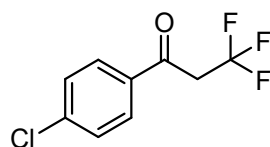

**1-(4-chlorophenyl)-3,3,3-trifluoropropan-1-one (3i):**

Yield 70%; 133 mg; yellow solid; mp 54-55 °C; TLC (PE:EtOAc, 100:1 v/v): R<sub>f</sub>= 0.2; <sup>1</sup>H NMR (400 MHz, CDCl<sub>3</sub>) δ 7.87 (d, *J* = 8.8 Hz, 2H), 7.47 (d, *J* = 8.8 Hz, 2H), 3.79 (q, *J* = 10.0 Hz, 2H). <sup>13</sup>C NMR (100 MHz, CDCl<sub>3</sub>) δ 188.6(q, *J* = 3.0 Hz, <sup>3</sup>*J*<sub>CF</sub>), 140.8, 134.0(q, *J* = 1.0 Hz, <sup>4</sup>*J*<sub>CF</sub>), 129.7, 129.2, 123.9(q, *J* = 275.0 Hz, <sup>1</sup>*J*<sub>CF</sub>), 42.0(q, *J* = 28.0 Hz, <sup>2</sup>*J*<sub>CF</sub>). <sup>19</sup>F NMR (376 MHz, CDCl<sub>3</sub>) δ -62.07. HRMS (ESI) *m/z* calcd for C<sub>9</sub>H<sub>6</sub>ClF<sub>3</sub>ONa<sup>+</sup> (M+Na)<sup>+</sup> 244.9952, found 244.9952.

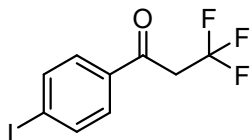

**3,3,3-trifluoro-1-(4-iodophenyl)propan-1-one (3j):**

Yield 57%; 179 mg; white solid; mp 93-94 °C; TLC (PE:EtOAc, 100:1 v/v): R<sub>f</sub>= 0.2; <sup>1</sup>H NMR (400 MHz, CDCl<sub>3</sub>) δ 7.88 (d, *J* = 8.4 Hz, 2H), 7.63 (d, *J* = 8.4 Hz, 2H), 3.76 (q, *J* = 10.0 Hz, 2H); <sup>13</sup>C NMR (100 MHz, CDCl<sub>3</sub>) δ 189.1(q, *J* = 2.0 Hz, <sup>3</sup>J<sub>CF</sub>), 138.3, 134.9(q, *J* = 1.0 Hz, <sup>4</sup>J<sub>CF</sub>), 129.6, 123.8(q, *J* = 276.0 Hz, <sup>1</sup>J<sub>CF</sub>), 102.6, 42.0(q, *J* = 29.0 Hz, <sup>2</sup>J<sub>CF</sub>). <sup>19</sup>F NMR (376 MHz, CDCl<sub>3</sub>) δ -62.07. <sup>19</sup>F NMR (376 MHz, CDCl<sub>3</sub>) δ -62.98. HRMS (ESI) m/z calcd for C<sub>9</sub>H<sub>6</sub>F<sub>3</sub>IONa<sup>+</sup> (M+Na)<sup>+</sup> 336.9308, found 336.9303.

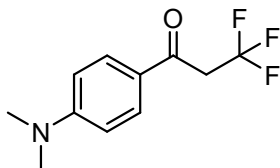

**1-(4-(dimethylamino)phenyl)-3,3,3-trifluoropropan-1-one (3k):**

Yield 71%; 164 mg; yellow solid; mp 104-105 °C; TLC (PE:EtOAc, 50:1 v/v): R<sub>f</sub>= 0.23; <sup>1</sup>H NMR (400 MHz, CDCl<sub>3</sub>) δ 7.82 (d, *J* = 9.2 Hz, 2H), 6.65 (d, *J* = 9.2 Hz, 2H), 3.67 (q, *J* = 10.4 Hz, 2H), 3.07 (s, 6H); <sup>13</sup>C NMR (100 MHz, CDCl<sub>3</sub>) δ 187.2(q, *J* = 3.0 Hz, <sup>3</sup>J<sub>CF</sub>), 153.9, 130.8, 124.4(q, *J* = 306.0 Hz, <sup>1</sup>J<sub>CF</sub>), 123.76(q, *J* = 2.0 Hz, <sup>4</sup>J<sub>CF</sub>), 110.7, 41.4(q, *J* = 27.0 Hz, <sup>2</sup>J<sub>CF</sub>), 39.9. <sup>19</sup>F NMR (376 MHz, CDCl<sub>3</sub>) δ -61.84. HRMS (ESI) m/z calcd for C<sub>11</sub>H<sub>12</sub>F<sub>3</sub>NONa<sup>+</sup> (M+Na)<sup>+</sup> 254.0763, found 254.0760.

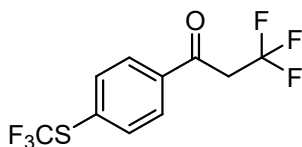

**3,3,3-trifluoro-1-(4-((trifluoromethyl)thio)phenyl)propan-1-one (3l):**

Yield 42%; 121 mg; yellow solid; mp 51-52 °C; TLC (PE:EtOAc, 100:1 v/v): R<sub>f</sub>= 0.2; <sup>1</sup>H NMR (400 MHz, CDCl<sub>3</sub>) δ 7.97 (d, *J* = 8.4 Hz, 2H), 7.79 (d, *J* = 8.4 Hz, 2H), 3.82 (q, *J* = 10.0 Hz, 2H); <sup>13</sup>C NMR (100 MHz, CDCl<sub>3</sub>) δ 188.88(q, *J* = 2.0 Hz, <sup>3</sup>J<sub>CF</sub>), 137.0(q, *J* = 1.0 Hz, <sup>4</sup>J<sub>CF</sub>), 135.7, 133.7, 131.6(q, *J* = 2.0 Hz, <sup>3</sup>J<sub>CF</sub>), 130.4, 129.13(q, *J* = 306.0 Hz, <sup>1</sup>J<sub>CF</sub>), 129.1, 124.5(q, *J* = 275.0 Hz, <sup>1</sup>J<sub>CF</sub>), 42.3(q, *J* = 28.0 Hz, <sup>2</sup>J<sub>CF</sub>); <sup>19</sup>F NMR (376 MHz, CDCl<sub>3</sub>) δ -41.50, -61.94. HRMS (ESI) m/z calcd for C<sub>10</sub>H<sub>6</sub>F<sub>6</sub>OSNa<sup>+</sup> (M+Na)<sup>+</sup> 310.9936, found 310.9933.

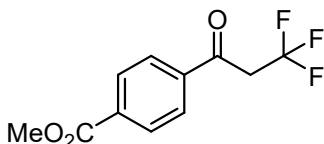

**methyl 4-(3,3,3-trifluoropropanoyl)benzoate (3m):**

Yield 50%; 123 mg; yellow solid; mp 97-99 °C; TLC (PE:EtOAc, 50:1 v/v): R<sub>f</sub>= 0.1; <sup>1</sup>H NMR (400 MHz, CDCl<sub>3</sub>) δ 8.15 (d, *J* = 8.4 Hz, 2H), 7.99 (d, *J* = 8.4 Hz, 2H), 3.96 (s, 3H), 3.87 (q, *J* = 10.0 Hz, 2H). <sup>13</sup>C NMR (100 MHz, CDCl<sub>3</sub>) δ 189.31(q, *J* = 2.0 Hz, <sup>3</sup>J<sub>CF</sub>), 165.8,



138.7(q,  $J = 1.0$  Hz,  $^4J_{CF}$ ), 134.7, 130.0, 128.2, 123.8(q,  $J = 275.0$  Hz,  $^1J_{CF}$ ), 52.5, 42.3(q,  $J = 28.0$  Hz,  $^2J_{CF}$ ).  $^{19}F$  NMR (376 MHz,  $CDCl_3$ )  $\delta$  -62.1.

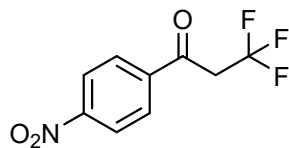

**3,3,3-trifluoro-1-(4-nitrophenyl)propan-1-one (3n):**

Yield 32%; 74 mg; yellow solid; mp 97-99 °C; TLC (PE:EtOAc, 10:1 v/v): Rf= 0.3;  $^1H$  NMR (400 MHz,  $CDCl_3$ )  $\delta$  8.37 (d,  $J = 8.4$  Hz, 2H), 8.14 (d,  $J = 8.4$  Hz, 2H), 3.91 (q,  $J = 9.6$  Hz, 2H).  $^{13}C$  NMR (100 MHz,  $CDCl_3$ )  $\delta$  188.5(q,  $J = 3.0$  Hz,  $^3J_{CF}$ ), 150.9, 139.93, 139.92, 129.5, 124.2, 123.6(q,  $J = 275.0$  Hz,  $^1J_{CF}$ ) 42.7(q,  $J = 29.0$  Hz,  $^2J_{CF}$ ).  $^{19}F$  NMR (376 MHz,  $CDCl_3$ )  $\delta$  -62.0.

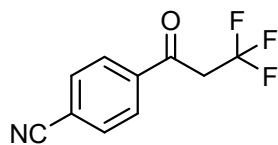

**4-(3,3,3-trifluoropropanoyl)benzonitrile (3o):**

Yield 29%; 61 mg; white solid; mp 128-129 °C; TLC (PE:EtOAc, 10:1 v/v): Rf= 0.25;  $^1H$  NMR (400 MHz,  $CDCl_3$ )  $\delta$  8.05 (d,  $J = 8.0$  Hz, 2H), 7.84 (d,  $J = 8.0$  Hz, 2H), 3.85 (q,  $J = 9.6$  Hz, 2H).  $^{13}C$  NMR (100 MHz,  $CDCl_3$ )  $\delta$  188.6(q,  $J = 2.0$  Hz,  $^3J_{CF}$ ), 138.5, 132.8, 128.8, 123.6(q,  $J = 275.0$  Hz,  $^1J_{CF}$ ), 117.6, 117.5, 42.4(q,  $J = 29.0$  Hz,  $^2J_{CF}$ ).  $^{19}F$  NMR (376 MHz,  $CDCl_3$ )  $\delta$  -62.1.

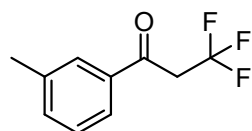

**3,3,3-trifluoro-1-(m-tolyl)propan-1-one (3p):**

Yield 70%; 141 mg; yellow oil; TLC (PE:EtOAc, 100:1 v/v): Rf= 0.2;  $^1H$  NMR (400 MHz,  $CDCl_3$ )  $\delta$  7.77-7.69 (m, 2H), 7.45 (d,  $J = 7.6$  Hz, 1H), 7.39 (t,  $J = 7.6$  Hz, 1H), 3.79 (q,  $J = 10.0$  Hz, 2H), 2.43 (s, 3H).  $^{13}C$  NMR (100 MHz,  $CDCl_3$ )  $\delta$  189.9(q,  $J = 3.0$  Hz,  $^3J_{CF}$ ), 138.9, 135.8, 135.0, 128.80, 128.77, 125.6, 124.0(q,  $J = 275.0$  Hz,  $^1J_{CF}$ ) 119.9, 42.1(q,  $J = 28.0$  Hz,  $^2J_{CF}$ ), 21.3.  $^{19}F$  NMR (376 MHz,  $CDCl_3$ )  $\delta$  -62.51.  $^{19}F$  NMR (376 MHz,  $CDCl_3$ )  $\delta$  -62.05. HRMS (ESI) m/z calcd for  $C_{10}H_9F_3ONa^+$  (M+Na) $^+$  225.0498, found 225.0498.

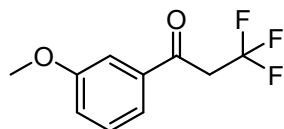

**3,3,3-trifluoro-1-(3-methoxyphenyl)propan-1-one (3q):**

Yield 62%; 135 mg; yellow oil; TLC (PE:EtOAc, 50:1 v/v): Rf= 0.2; <sup>1</sup>H NMR (400 MHz, CDCl<sub>3</sub>) δ 7.46 (dd, *J* = 6.8, 5.2 Hz, 2H), 7.40 (t, *J* = 8.0 Hz, 1H), 7.16 (dd, *J* = 8.0, 2.4 Hz, 1H), 3.84 (s, 3H), 3.79 (q, *J* = 10.0 Hz, 2H). <sup>13</sup>C NMR (100 MHz, CDCl<sub>3</sub>) δ 189.6(q, *J* = 3.0 Hz, <sup>3</sup>*J*<sub>CF</sub>), 160.0, 137.1(q, *J* = 2.0 Hz, <sup>4</sup>*J*<sub>CF</sub>), 129.9, 124.1(q, *J* = 276.0 Hz, <sup>1</sup>*J*<sub>CF</sub>), 120.9, 120.7, 112.5, 55.44, 55.37, 42.1(q, *J* = 28.0 Hz, <sup>2</sup>*J*<sub>CF</sub>). <sup>19</sup>F NMR (376 MHz, CDCl<sub>3</sub>) δ -62.14. HRMS (ESI) *m/z* calcd for C<sub>10</sub>H<sub>9</sub>F<sub>3</sub>O<sub>2</sub>Na<sup>+</sup> (M+Na)<sup>+</sup> 241.0447, found 241.0447.

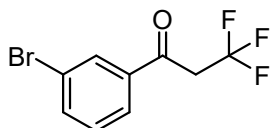

**1-(3-bromophenyl)-3,3,3-trifluoropropan-1-one (3r):**

Yield 44%; 117mg; yellow oil; TLC (PE:EtOAc, 100:1 v/v): Rf= 0.2; <sup>1</sup>H NMR (400 MHz, CDCl<sub>3</sub>) δ 8.06 (s, 1H), 7.86 (d, *J* = 8.0 Hz, 1H), 7.77 (dd, *J* = 8.0, 0.8 Hz, 1H), 7.40 (t, *J* = 8.0 Hz, 1H), 3.78 (q, *J* = 10.0 Hz, 2H). <sup>13</sup>C NMR (100 MHz, CDCl<sub>3</sub>) δ 188.4(q, *J* = 2.0 Hz, <sup>3</sup>*J*<sub>CF</sub>), 137.40(q, *J* = 2.0 Hz, <sup>4</sup>*J*<sub>CF</sub>), 137.1, 131.4, 130.5, 126.9, 123.8(q, *J* = 275.0 Hz, <sup>1</sup>*J*<sub>CF</sub>), 123.3, 42.2(q, *J* = 29.0 Hz, <sup>2</sup>*J*<sub>CF</sub>). <sup>19</sup>F NMR (376 MHz, CDCl<sub>3</sub>) δ -62.03.

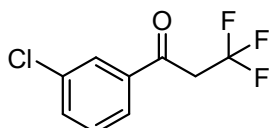

**1-(3-chlorophenyl)-3,3,3-trifluoropropan-1-one (3s):**

Yield 48%; 106 mg; yellow oil; TLC (PE:EtOAc, 100:1 v/v): Rf= 0.2; <sup>1</sup>H NMR (400 MHz, CDCl<sub>3</sub>) δ 7.91 (s, 1H), 7.81 (d, *J* = 8.0 Hz, 1H), 7.61 (d, *J* = 8.0 Hz, 1H), 7.47 (t, *J* = 8.0 Hz, 1H), 3.79 (q, *J* = 10.0 Hz, 2H). <sup>13</sup>C NMR (100 MHz, CDCl<sub>3</sub>) δ 188.5(q, *J* = 3.0 Hz, <sup>3</sup>*J*<sub>CF</sub>), 137.2(q, *J* = 1.0 Hz, <sup>4</sup>*J*<sub>CF</sub>), 135.4, 134.1, 130.3, 128.4, 126.4, 123.7(q, *J* = 276.0 Hz, <sup>1</sup>*J*<sub>CF</sub>), 42.2(q, *J* = 29.0 Hz, <sup>2</sup>*J*<sub>CF</sub>); <sup>19</sup>F NMR (376 MHz, CDCl<sub>3</sub>) δ -62.05. HRMS (ESI) *m/z* calcd for C<sub>9</sub>H<sub>6</sub>ClF<sub>3</sub>ONa<sup>+</sup> (M+Na)<sup>+</sup> 244.9952, found 244.9950.

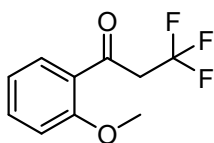

**3,3,3-trifluoro-1-(2-methoxyphenyl)propan-1-one (3t):**

Yield 56 %; 122 mg; yellow solid; mp 50-51 °C; TLC (PE:EtOAc, 50:1 v/v): Rf= 0.2; <sup>1</sup>H NMR (400 MHz, CDCl<sub>3</sub>) δ 7.81 (dd, *J* = 8.0, 1.6 Hz, 1H), 7.57–7.48 (m, 1H), 7.06–6.97 (m, 2H), 3.94 (s, 3H), 3.88 (q, *J* = 10.4 Hz, 2H). <sup>13</sup>C NMR (100 MHz, CDCl<sub>3</sub>) δ 191.0(q, *J* = 2.0 Hz, <sup>3</sup>*J*<sub>CF</sub>), 158.9, 134.9, 130.9, 126.3, 124.2(q, *J* = 275.0 Hz, <sup>1</sup>*J*<sub>CF</sub>), 121.0, 111.6, 55.6, 46.8(q, *J* = 27.0 Hz, <sup>2</sup>*J*<sub>CF</sub>). <sup>19</sup>F NMR (376 MHz, CDCl<sub>3</sub>) δ -62.50. HRMS (ESI) *m/z* calcd for C<sub>10</sub>H<sub>9</sub>F<sub>3</sub>O<sub>2</sub>Na<sup>+</sup> (M+Na)<sup>+</sup> 241.0447, found 241.0447.

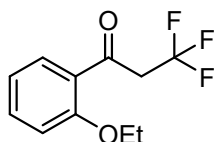

**1-(2-ethoxyphenyl)-3,3,3-trifluoropropan-1-one (3u):**

Yield 68%; 158 mg; white solid; mp 51-53 °C; TLC (PE:EtOAc, 50:1 v/v): R<sub>f</sub>= 0.2; <sup>1</sup>H NMR (400 MHz, CDCl<sub>3</sub>) δ 7.82 (d, *J* = 7.6 Hz, 1H), 7.51 (t, *J* = 8.0 Hz, 1H), 7.08–6.90 (m, 2H), 4.17 (q, *J* = 6.8 Hz, 2H), 3.92 (q, *J* = 10.4 Hz, 2H), 1.51 (t, *J* = 6.8 Hz, 3H). <sup>13</sup>C NMR (100 MHz, CDCl<sub>3</sub>) δ 191.16(q, *J* = 2.0 Hz, <sup>3</sup>*J*<sub>CF</sub>), 158.4, 135.0, 130.9, 126.44(q, *J* = 2.0 Hz, <sup>4</sup>*J*<sub>CF</sub>), 124.2(q, *J* = 275.0 Hz, <sup>1</sup>*J*<sub>CF</sub>), 120.8, 112.3, 64.3, 46.9(q, *J* = 27.0 Hz, <sup>2</sup>*J*<sub>CF</sub>), 14.7. <sup>19</sup>F NMR (376 MHz, CDCl<sub>3</sub>) δ -62.51. HRMS (ESI) *m/z* calcd for C<sub>11</sub>H<sub>11</sub>F<sub>3</sub>O<sub>2</sub>Na<sup>+</sup> (M+H)<sup>+</sup> 233.0784, found 233.0788.

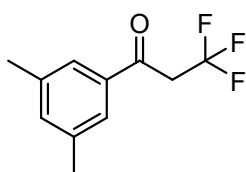

**1-(3,5-dimethylphenyl)-3,3,3-trifluoropropan-1-one (3v):**

Yield 68%; 147 mg; yellow oil; TLC (PE:EtOAc, 100:1 v/v): R<sub>f</sub>= 0.2; <sup>1</sup>H NMR (400 MHz, CDCl<sub>3</sub>) δ 7.53 (s, 2H), 7.26 (s, 1H), 3.77 (q, *J* = 10.0 Hz, 2H), 2.38 (s, 6H). <sup>13</sup>C NMR (100 MHz, CDCl<sub>3</sub>) δ 190.11(q, *J* = 2.0 Hz, <sup>3</sup>*J*<sub>CF</sub>), 138.7, 135.94(q, *J* = 2.0 Hz, <sup>4</sup>*J*<sub>CF</sub>), 135.88, 126.1, 124.1(q, *J* = 275.0 Hz, <sup>1</sup>*J*<sub>CF</sub>), 42.0(q, *J* = 29.0 Hz, <sup>2</sup>*J*<sub>CF</sub>), 21.2. <sup>19</sup>F NMR (376 MHz, CDCl<sub>3</sub>) δ -62.09. HRMS (ESI) *m/z* calcd for C<sub>11</sub>H<sub>11</sub>F<sub>3</sub>ONa<sup>+</sup> (M+Na)<sup>+</sup> 239.0654, found 239.0654.

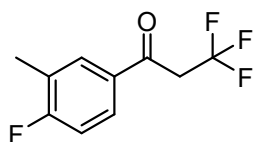

**3,3,3-trifluoro-1-(4-fluoro-3-methylphenyl)propan-1-one (3w):**

Yield 53%; 117 mg; yellow solid; mp 61-62 °C; TLC (PE:EtOAc, 100:1 v/v): R<sub>f</sub>= 0.2; <sup>1</sup>H NMR (400 MHz, CDCl<sub>3</sub>) δ 7.86–7.72 (m, 2H), 7.11 (t, *J* = 8.8 Hz, 1H), 3.77 (q, *J* = 10.0 Hz, 2H), 2.34 (s, 3H); <sup>13</sup>C NMR (100 MHz, CDCl<sub>3</sub>) δ 188.4(q, *J* = 2.0 Hz, <sup>3</sup>*J*<sub>CF</sub>), 164.9(q, *J* = 255.0 Hz, <sup>1</sup>*J*<sub>CF</sub>), 132.3, 132.1(q, *J* = 8.0 Hz, <sup>3</sup>*J*<sub>CF</sub>), 128.5, 128.4(q, *J* = 10.0 Hz, <sup>3</sup>*J*<sub>CF</sub>), 126.0(q, *J* = 18.0 Hz, <sup>2</sup>*J*<sub>CF</sub>), 123.9(q, *J* = 275.0 Hz, <sup>1</sup>*J*<sub>CF</sub>), 115.6(q, *J* = 24.0 Hz, <sup>2</sup>*J*<sub>CF</sub>), 41.9(q, *J* = 27.0 Hz, <sup>2</sup>*J*<sub>CF</sub>), 14.48(q, *J* = 3.0 Hz, <sup>3</sup>*J*<sub>CF</sub>). <sup>19</sup>F NMR (376 MHz, CDCl<sub>3</sub>) δ -62.02, -107.00.

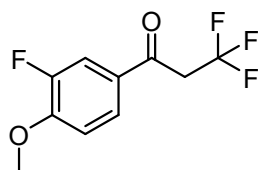

**1-([1,1'-biphenyl]-4-yl)-3,3,3-trifluoropropan-1-one (3x):**

Yield 58%; 136 mg; white solid; mp 85-86 °C; TLC (PE:EtOAc, 50:1 v/v): R<sub>f</sub>= 0.2; <sup>1</sup>H NMR (400 MHz, CDCl<sub>3</sub>) δ 8.00 (d, *J* = 8.4 Hz, 2H), 7.71 (d, *J* = 8.4 Hz, 2H), 7.62 (d, *J* = 7.2 Hz, 2H), 7.48 (t, *J* = 7.2 Hz, 2H), 7.43 (d, *J* = 7.2 Hz, 1H), 3.82 (q, *J* = 10.0 Hz, 2H). <sup>13</sup>C NMR (100 MHz, CDCl<sub>3</sub>) δ 189.3(q, *J* = 3.0 Hz, <sup>3</sup>*J*<sub>CF</sub>), 146.8, 139.3, 134.4(q, *J* = 2.0 Hz, <sup>4</sup>*J*<sub>CF</sub>), 129.02, 128.96, 128.6, 127.5, 127.3, 124.0(q, *J* = 276.0 Hz, <sup>1</sup>*J*<sub>CF</sub>), 42.0(q, *J* = 28.0 Hz, <sup>2</sup>*J*<sub>CF</sub>). <sup>19</sup>F NMR (376 MHz, CDCl<sub>3</sub>) δ -62.51. HRMS (ESI) *m/z* calcd for C<sub>15</sub>H<sub>11</sub>F<sub>3</sub>ONa<sup>+</sup> (M+Na)<sup>+</sup> 287.0654, found 287.0656.

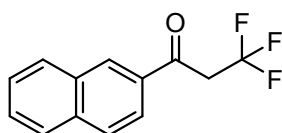

**3,3,3-trifluoro-1-(naphthalen-2-yl)propan-1-one (3y):**

Yield 66%; 157 mg; yellow solid; mp 83-84 °C; TLC (PE:EtOAc, 100:1 v/v): R<sub>f</sub>= 0.15; <sup>1</sup>H NMR (400 MHz, CDCl<sub>3</sub>) δ 8.40 (s, 1H), 7.98 (t, *J* = 9.6 Hz, 2H), 7.94–7.87 (m, 2H), 7.64 (t, *J* = 7.6 Hz, 1H), 7.58 (t, *J* = 7.6 Hz, 1H), 3.92 (q, *J* = 10.0 Hz, 2H).; <sup>13</sup>C NMR (100 MHz, CDCl<sub>3</sub>) δ 189.61(q, *J* = 3.0 Hz, <sup>3</sup>*J*<sub>CF</sub>), 135.9, 133.2(q, *J* = 2.0 Hz, <sup>4</sup>*J*<sub>CF</sub>), 132.3, 130.5, 129.7, 129.2, 128.9, 127.8, 127.2, 124.08(q, *J* = 275.0 Hz, <sup>1</sup>*J*<sub>CF</sub>), 123.4, 42.1(q, *J* = 28.0 Hz, <sup>2</sup>*J*<sub>CF</sub>). <sup>19</sup>F NMR (376 MHz, CDCl<sub>3</sub>) δ -61.90. HRMS (ESI) *m/z* calcd for C<sub>13</sub>H<sub>10</sub>F<sub>3</sub>O<sup>+</sup> (M+H)<sup>+</sup> 239.0678, found 239.0674.

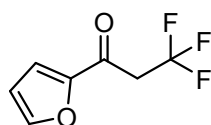

**3,3,3-trifluoro-1-(furan-2-yl)propan-1-one (3z):**

Yield 74%; 132 mg; yellow oil; TLC (PE:EtOAc, 100:1 v/v): R<sub>f</sub>= 0.24; <sup>1</sup>H NMR (400 MHz, CDCl<sub>3</sub>) δ 7.65 (s, 1H), 7.32 (d, *J* = 3.6 Hz, 1H), 6.67–6.53 (m, 1H), 3.67 (q, *J* = 10.4 Hz, 2H). <sup>13</sup>C NMR (100 MHz, CDCl<sub>3</sub>) δ 178.2(q, *J* = 3.0 Hz, <sup>3</sup>*J*<sub>CF</sub>), 151.9(q, *J* = 2.0 Hz, <sup>4</sup>*J*<sub>CF</sub>), 147.4, 123.7(q, *J* = 276.0 Hz, <sup>1</sup>*J*<sub>CF</sub>), 118.8, 113.0, 42.2(q, *J* = 29.0 Hz, <sup>2</sup>*J*<sub>CF</sub>). <sup>19</sup>F NMR (376 MHz, CDCl<sub>3</sub>) δ -61.95.

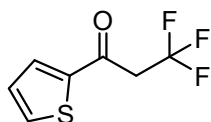

**3,3,3-trifluoro-1-(thiophen-2-yl)propan-1-one (3aa):**

Yield 72%; 139 mg; yellow oil; TLC (PE:EtOAc, 100:1 v/v): R<sub>f</sub>= 0.24; <sup>1</sup>H NMR (400 MHz, CDCl<sub>3</sub>) δ 7.74 (dd, *J* = 9.2, 4.4 Hz, 2H), 7.18 (t, *J* = 4.4 Hz, 1H), 3.72 (q, *J* = 10.0 Hz, 2H).; <sup>13</sup>C NMR (100 MHz, CDCl<sub>3</sub>) δ 182.1(q, *J* = 3.0 Hz, <sup>3</sup>*J*<sub>CF</sub>), 143.2(q, *J* = 2.0 Hz, <sup>4</sup>*J*<sub>CF</sub>), 135.7, 133.4, 128.5, 123.6(q, *J* = 275.0 Hz, <sup>1</sup>*J*<sub>CF</sub>), 43.0(q, *J* = 28.0 Hz, <sup>2</sup>*J*<sub>CF</sub>). <sup>19</sup>F NMR (376 MHz, CDCl<sub>3</sub>) δ -61.94. HRMS (ESI) *m/z* calcd for C<sub>7</sub>H<sub>5</sub>F<sub>3</sub>OSNa<sup>+</sup> (M+Na)<sup>+</sup> 216.9905, found 216.9906.

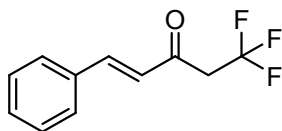

**(E)-5,5,5-trifluoro-1-phenylpent-1-en-3-one (3ab):**

Yield 62%; 133 mg; white solid; mp 55-56 °C; TLC (PE): R<sub>f</sub>= 0.1; <sup>1</sup>H NMR (400 MHz, CDCl<sub>3</sub>) δ 7.61 (d, *J* = 16.0 Hz, 1H), 7.58–7.51 (m, 2H), 7.42 (t, *J* = 6.0 Hz, 3H), 6.80 (d, *J* = 16.0 Hz, 1H), 3.47 (q, *J* = 10.4 Hz, 2H). <sup>13</sup>C NMR (100 MHz, CDCl<sub>3</sub>) δ 189.13(q, *J* = 3.0 Hz, <sup>3</sup>*J*<sub>CF</sub>), 145.3, 133.7, 131.2, 129.0, 128.6, 124.66(q, *J* = 2.0 Hz, <sup>4</sup>*J*<sub>CF</sub>), 123.9(q, *J* = 276.0 Hz, <sup>1</sup>*J*<sub>CF</sub>), 44.5(q, *J* = 28.0 Hz, <sup>2</sup>*J*<sub>CF</sub>). <sup>19</sup>F NMR (376 MHz, CDCl<sub>3</sub>) δ -62.02. HRMS (ESI) *m/z* calcd for C<sub>11</sub>H<sub>9</sub>F<sub>3</sub>ONa<sup>+</sup> (M+Na)<sup>+</sup> 237.0498, found 237.0493.

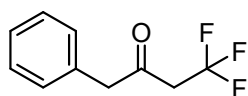

**4,4,4-trifluoro-1-phenylbutan-2-one (3ac):**

Yield 62%; 125 mg; white oil; TLC (PE): R<sub>f</sub>= 0.1; <sup>1</sup>H NMR (400 MHz, CDCl<sub>3</sub>) δ 7.40–7.30 (m, 3H), 7.20 (d, *J* = 6.8 Hz, 2H), 3.80 (s, 2H), 3.23 (q, *J* = 10.4 Hz, 2H). <sup>13</sup>C NMR (100 MHz, CDCl<sub>3</sub>) δ 197.69(q, *J* = 2.0 Hz, <sup>3</sup>*J*<sub>CF</sub>), 132.4, 129.5, 129.1, 127.7, 123.6(q, *J* = 275.0 Hz, <sup>1</sup>*J*<sub>CF</sub>), 50.60(q, *J* = 2.0 Hz, <sup>4</sup>*J*<sub>CF</sub>), 45.0(q, *J* = 29.0 Hz, <sup>2</sup>*J*<sub>CF</sub>). <sup>19</sup>F NMR (376 MHz, CDCl<sub>3</sub>) δ -62.37. HRMS (ESI) *m/z* calcd for C<sub>10</sub>H<sub>9</sub>F<sub>3</sub>ONa<sup>+</sup> (M+Na)<sup>+</sup> 225.0498, found 225.0497.

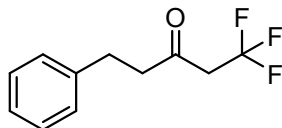

**4,4,4-trifluoro-1-phenylbutan-2-one (3ad):**

Yield 68%; 145 mg; yellow oil; TLC (PE): R<sub>f</sub>= 0.1; <sup>1</sup>H NMR (400 MHz, CDCl<sub>3</sub>) δ 7.29 (t, *J* = 7.2 Hz, 2H), 7.24–7.15 (m, 3H), 3.18 (q, *J* = 10.4 Hz, 2H), 2.92 (dd, *J* = 11.2, 4.4 Hz, 2H), 2.87–2.81 (m, 2H). <sup>13</sup>C NMR (100 MHz, CDCl<sub>3</sub>) δ 199.3(q, *J* = 2.0 Hz, <sup>3</sup>*J*<sub>CF</sub>), 140.2, 128.7, 128.3, 126.4, 123.6(q, *J* = 275.0 Hz, <sup>1</sup>*J*<sub>CF</sub>), 46.4(q, *J* = 28.0 Hz, <sup>2</sup>*J*<sub>CF</sub>), 45.00, 44.98, 29.2. <sup>19</sup>F NMR (376 MHz, CDCl<sub>3</sub>) δ -62.37. HRMS (ESI) *m/z* calcd for C<sub>11</sub>H<sub>11</sub>F<sub>3</sub>ONa<sup>+</sup> (M+Na)<sup>+</sup> 239.06542, found 239.06544.

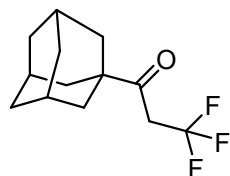

**1-((1r,3R,5S)-adamantan-1-yl)-3,3,3-trifluoropropan-1-one (3ae):**

Yield 67%; 164 mg; white solid; mp 59-61 °C; TLC (PE): R<sub>f</sub>= 0.1; <sup>1</sup>H NMR (400 MHz, CDCl<sub>3</sub>) δ 3.30 (q, *J* = 10.0 Hz, 2H), 2.08 (s, 3H), 1.79 (dd, *J* = 14.0, 8.0 Hz, 9H), 1.69 (d, *J* = 12.0 Hz, 3H). <sup>13</sup>C NMR (100 MHz, CDCl<sub>3</sub>) δ 204.9(q, *J* = 2.0 Hz, <sup>3</sup>*J*<sub>CF</sub>), 124.3(q, *J* = 275.0 Hz, <sup>1</sup>*J*<sub>CF</sub>), 47.0(q, *J* = 1.0 Hz, <sup>4</sup>*J*<sub>CF</sub>), 39.1(q, *J* = 28.0 Hz, <sup>2</sup>*J*<sub>CF</sub>), 37.6, 36.3, 27.6. <sup>19</sup>F NMR (376 MHz,

CDCl<sub>3</sub>)  $\delta$  -62.27. HRMS (ESI)  $m/z$  calcd for C<sub>13</sub>H<sub>17</sub>F<sub>3</sub>ONa<sup>+</sup> (M+Na)<sup>+</sup> 269.1124, found 269.1124.

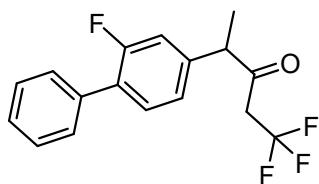

**1,1,1-trifluoro-4-(2-fluoro-[1,1'-biphenyl]-4-yl)pentan-3-one (3af):**

Yield 68%; 210 mg; yellow oil; TLC (PE:EtOAc, 100:1 v/v): R<sub>f</sub>= 0.2; <sup>1</sup>H NMR (400 MHz, CDCl<sub>3</sub>)  $\delta$  7.54 (d,  $J$  = 8.0 Hz, 2H), 7.48–7.42 (m, 3H), 7.38 (t,  $J$  = 7.2 Hz, 1H), 7.09–6.97 (m, 2H), 3.84 (q,  $J$  = 6.8 Hz, 1H), 3.21 (dd,  $J$  = 22.4, 10.4 Hz, 2H), 1.46 (d,  $J$  = 6.8 Hz, 3H). <sup>13</sup>C NMR (100 MHz, CDCl<sub>3</sub>)  $\delta$  199.43(q,  $J$  = 2.0 Hz, <sup>3</sup>J<sub>CF</sub>), 160.0(q,  $J$  = 248.0 Hz, <sup>1</sup>J<sub>CF</sub>), 140(d,  $J$  = 8.0 Hz, <sup>2</sup>J<sub>CF</sub>), 135.0, 131.7(d,  $J$  = 4.0 Hz, <sup>3</sup>J<sub>CF</sub>), 128.9(d,  $J$  = 3.0 Hz, <sup>3</sup>J<sub>CF</sub>), 128.7(d,  $J$  = 13.0 Hz, <sup>2</sup>J<sub>CF</sub>), 128.57, 128.0, 123.9(d,  $J$  = 3.0 Hz, <sup>3</sup>J<sub>CF</sub>), 123.6(q,  $J$  = 276.0 Hz, <sup>1</sup>J<sub>CF</sub>), 115.6(d,  $J$  = 24.0 Hz, <sup>2</sup>J<sub>CF</sub>), 53.1, 44.2(q,  $J$  = 28.0 Hz, <sup>2</sup>J<sub>CF</sub>), 17.1. <sup>19</sup>F NMR (376 MHz, CDCl<sub>3</sub>)  $\delta$  -62.38, -116.26. HRMS (ESI)  $m/z$  calcd for C<sub>17</sub>H<sub>14</sub>F<sub>4</sub>O<sub>3</sub>Na<sup>+</sup> (M+Na)<sup>+</sup> 333.0873, found 333.0885.

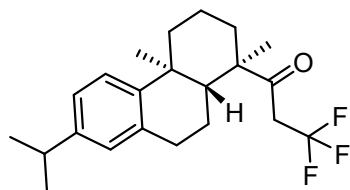

**3,3,3-trifluoro-1-((1R,4aS,10aR)-7-isopropyl-1,4a-dimethyl-1,2,3,4,4a,9,10,10a-octahydrophenanthren-1-yl)propan-1-one (3ag):**

Yield 62%; 227 mg; colorless oil; TLC (PE): R<sub>f</sub>= 0.2; <sup>1</sup>H NMR (400 MHz, CDCl<sub>3</sub>)  $\delta$  7.17 (d,  $J$  = 8.4 Hz, 1H), 7.02 (d,  $J$  = 8.0 Hz, 1H), 6.90 (s, 1H), 3.49–3.16 (m, 2H), 2.96–2.74 (m, 3H), 2.36 (d,  $J$  = 13.2 Hz, 1H), 2.06 (dd,  $J$  = 12.4, 1.6 Hz, 1H), 1.85–1.72 (m, 3H), 1.58–1.47 (m, 3H), 1.23 (t,  $J$  = 6.8 Hz, 13H). <sup>13</sup>C NMR (100 MHz, CDCl<sub>3</sub>)  $\delta$  205.3(q,  $J$  = 1.0 Hz, <sup>3</sup>J<sub>CF</sub>), 146.5, 146.1, 134.4, 127.1, 124.3(q,  $J$  = 276.0 Hz, <sup>1</sup>J<sub>CF</sub>), 124.12, 124.07, 53.1(q,  $J$  = 1.0 Hz, <sup>4</sup>J<sub>CF</sub>), 43.5, 39.8(q,  $J$  = 28.0 Hz, <sup>2</sup>J<sub>CF</sub>), 37.8, 36.9, 35.0, 33.5, 29.8, 25.2, 24.01, 23.99, 21.5, 18.3, 15.6. <sup>19</sup>F NMR (376 MHz, CDCl<sub>3</sub>)  $\delta$  -62.2. HRMS (ESI)  $m/z$  calcd for C<sub>30</sub>H<sub>30</sub>F<sub>3</sub>O<sub>2</sub>Na<sup>+</sup> (M+Na)<sup>+</sup> 405.1802, found 405.1810.

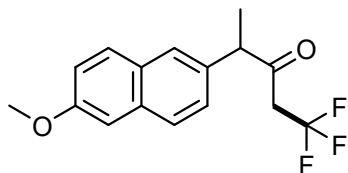

**3-(2-fluorophenyl)-1-(2-hydroxyphenyl)-3-(2-methyl-6-(trimethylgermyl)phenyl)propan-1-one (3ah):**

Yield 64%; 189 mg; white solid; mp 54–56 °C ; TLC (PE:EtOAc, 50:1 v/v): R<sub>f</sub>= 0.2; <sup>1</sup>H NMR (400 MHz, CDCl<sub>3</sub>)  $\delta$  7.72 (dd,  $J$  = 14.0, 8.8 Hz, 2H), 7.59 (s, 1H), 7.26–7.22 (m, 1H), 7.18 (dd,  $J$  = 8.8, 2.4 Hz, 1H), 7.13 (d,  $J$  = 2.4 Hz, 1H), 3.91 (s, 3H), 3.26–3.04 (m, 2H), 1.49

(d,  $J = 6.8$  Hz, 4H).  $^{13}\text{C}$  NMR (100 MHz,  $\text{CDCl}_3$ )  $\delta$  200.3(q,  $J = 2.0$  Hz,  $^3J_{\text{CF}}$ ), 158.0, 134.0, 133.9, 129.24, 129.15, 128.2, 126.9, 126.0, 123.7(q,  $J = 275.0$  Hz,  $^1J_{\text{CF}}$ ), 119.6, 105.6, 55.4, 53.8, 43.9(q,  $J = 28.0$  Hz,  $^2J_{\text{CF}}$ ), 17.1.  $^{19}\text{F}$  NMR (376 MHz,  $\text{CDCl}_3$ )  $\delta$  -62.4. HRMS (ESI)  $m/z$  calcd for  $\text{C}_{16}\text{H}_{15}\text{F}_3\text{O}_2\text{Na}^+$  ( $\text{M}+\text{Na}$ ) $^+$  319.0916, found 319.0927.

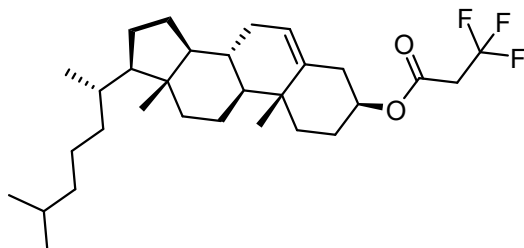

**(3S,8S,9S,10R,13R,14S,17R)-10,13-dimethyl-17-((S)-6-methylheptan-2-yl)-2,3,4,7,8,9,10,11,12,13,14,15,16,17-tetradecahydro-1H-cyclopenta[a]phenanthren-3-yl 3,3,3-trifluoropropanoate (3ai):**

Yield 71%; 352 mg; white solid; mp 99–100°C; TLC (PE);  $^1\text{H}$  NMR (400 MHz,  $\text{CDCl}_3$ )  $\delta$  5.39 (d,  $J = 4.0$  Hz, 1H), 4.79–4.57 (m, 1H), 3.15 (q,  $J = 10.0$  Hz, 2H), 2.35 (d,  $J = 8.0$  Hz, 2H), 2.07–1.93 (m, 2H), 1.92–1.77 (m, 3H), 1.66–1.42 (m, 7H), 1.39–0.97 (m, 17H), 0.91 (d,  $J = 6.4$  Hz, 3H), 0.86 (dd,  $J = 6.8, 1.6$  Hz, 6H), 0.68 (s, 3H).  $^{13}\text{C}$  NMR (100 MHz,  $\text{CDCl}_3$ )  $\delta$  163.5(q,  $J = 4.0$  Hz,  $^3J_{\text{CF}}$ ), 139.1, 123.5(q,  $J = 275.0$  Hz,  $^1J_{\text{CF}}$ ), 123.1, 75.7, 56.7, 56.1, 50.0, 42.3, 40.0(q,  $J = 30.0$  Hz,  $^2J_{\text{CF}}$ ), 39.7, 39.5, 37.8, 36.9, 36.5, 36.2, 35.8, 31.9, 31.8, 28.3, 28.0, 27.5, 24.3, 23.9, 22.9, 22.6, 21.0, 19.3, 18.7, 11.9.  $^{19}\text{F}$  NMR (376 MHz,  $\text{CDCl}_3$ )  $\delta$  -63.48. HRMS (ESI)  $m/z$  calcd for  $\text{C}_{30}\text{H}_{47}\text{F}_3\text{O}_2\text{Na}^+$  ( $\text{M}+\text{Na}$ ) $^+$  519.3420, found 519.3423.

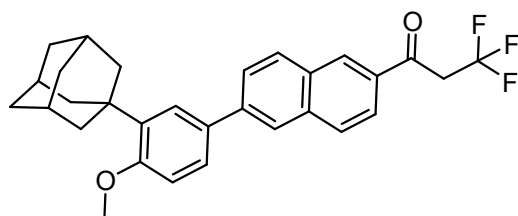

**1-(6-(3-((3r,5r,7r)-adamantan-1-yl)-4-methoxyphenyl)naphthalen-2-yl)-3,3,3-trifluoropropan-1-one (3aj):**

Yield 65%; 310 mg; white solid; mp 186–187 °C; TLC (PE:EtOAc, 100:1 v/v):  $R_f = 0.2$ ;  $^1\text{H}$  NMR (400 MHz,  $\text{CDCl}_3$ )  $\delta$  8.39 (s, 1H), 8.07–7.96 (m, 3H), 7.93 (d,  $J = 8.8$  Hz, 1H), 7.82 (d,  $J = 8.4$  Hz, 1H), 7.60 (s, 1H), 7.54 (dd,  $J = 8.4, 1.2$  Hz, 1H), 6.99 (d,  $J = 8.4$  Hz, 1H), 3.99–3.84 (m, 5H), 2.18 (s, 6H), 2.11 (s, 3H), 1.80 (s, 6H).  $^{13}\text{C}$  NMR (100 MHz,  $\text{CDCl}_3$ )  $\delta$  189.5(q,  $J = 2.0$  Hz,  $^3J_{\text{CF}}$ ), 159.2, 142.4, 139.1, 136.5, 132.7(q,  $J = 1.0$  Hz,  $^4J_{\text{CF}}$ ), 132.2, 131.0, 130.4, 130.1, 129.0, 127.0, 126.0, 125.6, 124.7, 124.2(q,  $J = 275.0$  Hz,  $^1J_{\text{CF}}$ ), 123.9, 112.1, 55.2, 42.2(q,  $J = 28.0$  Hz,  $^2J_{\text{CF}}$ ), 40.6, 37.3, 37.1, 29.1.  $^{19}\text{F}$  NMR (376 MHz,  $\text{CDCl}_3$ )  $\delta$  -61.8. HRMS (ESI)  $m/z$  calcd for  $\text{C}_{30}\text{H}_{30}\text{F}_3\text{O}_2\text{Na}^+$  ( $\text{M}+\text{Na}$ ) $^+$  479.2192, found 479.2191.

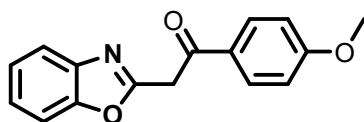

**2-(benzo[d]oxazol-2-yl)-1-(4-methoxyphenyl)ethan-1-one (8):**

Yield 85%; 227mg; white solid; mp 86-88°C; TLC (PE:EtOAc, 5:1 v/v): Rf= 0.3; <sup>1</sup>H NMR (400 MHz, CDCl<sub>3</sub>) δ 8.03 (d, *J* = 8.4 Hz, 2H), 7.71 (dd, *J* = 5.2, 3.2 Hz, 1H), 7.53–7.46 (m, 1H), 7.32 (dd, *J* = 5.6, 3.2 Hz, 2H), 6.96 (d, *J* = 8.4 Hz, 2H), 4.59 (s, 2H), 3.86 (s, 3H). <sup>13</sup>C NMR (100 MHz, CDCl<sub>3</sub>) δ 190.9, 164.2, 160.9, 151.3, 141.2, 131.1, 128.8, 125.0, 124.4, 120.0, 114.1, 110.7, 55.6, 39.5. HRMS (ESI) *m/z* calcd for C<sub>16</sub>H<sub>14</sub>NO<sub>3</sub><sup>+</sup> (M+H)<sup>+</sup> 268.0968, found 268.0964.

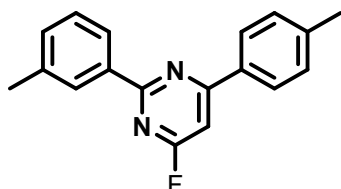**4-fluoro-2-(*m*-tolyl)-6-(*p*-tolyl)pyrimidine (9):**

Yield 83%; 230 mg; white solid; mp 57-58 °C; TLC (PE): Rf= 0.3; <sup>1</sup>H NMR (400 MHz, CDCl<sub>3</sub>) δ 8.35 (d, *J* = 6.8 Hz, 2H), 8.07 (d, *J* = 8.0 Hz, 2H), 7.39 (t, *J* = 8.0 Hz, 1H), 7.32 (d, *J* = 8.0 Hz, 3H), 7.11 (s, 1H), 2.46 (s, 3H), 2.43 (s, 3H). <sup>13</sup>C NMR (100 MHz, CDCl<sub>3</sub>) δ 171.3(d, *J* = 248.0 Hz), 168.6(d, *J* = 8.0 Hz), 165.4(d, *J* = 14.0 Hz), 142.0, 138.3, 136.5, 133.3(d, *J* = 4.0 Hz), 129.8, 129.1, 128.5, 127.3, 125.9, 99.0(d, *J* = 32.0 Hz), 21.6, 21.5. <sup>19</sup>F NMR (376 MHz, CDCl<sub>3</sub>) δ -61.2. HRMS (ESI) *m/z* calcd for C<sub>18</sub>H<sub>16</sub>FN<sub>2</sub><sup>+</sup> (M+H)<sup>+</sup> 279.1292, found 279.1301.

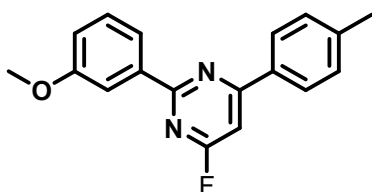**4-fluoro-2-(3-methoxyphenyl)-6-(*p*-tolyl)pyrimidine (10):**

Yield 85%; 250 mg; white solid; mp 71-72°C; TLC (PE:EtOAc, 100:1 v/v): Rf= 0.3; <sup>1</sup>H NMR (400 MHz, CDCl<sub>3</sub>) δ 8.16 (d, *J* = 7.6 Hz, 1H), 8.07 (d, *J* = 8.4 Hz, 3H), 7.41 (t, *J* = 8.0 Hz, 1H), 7.31 (d, *J* = 8.0 Hz, 2H), 7.13 (s, 1H), 7.06 (dd, *J* = 8.0, 2.4 Hz, 1H), 3.91 (s, 3H), 2.43 (s, 3H). <sup>13</sup>C NMR (100 MHz, CDCl<sub>3</sub>) δ 171.3(d, *J* = 247.0 Hz), 168.5(d, *J* = 7.0 Hz), 165.0(d, *J* = 14.0 Hz), 159.9, 142.1, 138.0, 133.3(d, *J* = 5.0 Hz), 129.8, 129.6, 127.3, 121.2, 117.7, 113.3, 99.2(d, *J* = 31.0 Hz), 55.5, 21.6. <sup>19</sup>F NMR (376 MHz, CDCl<sub>3</sub>) δ -61.2. HRMS (ESI) *m/z* calcd for C<sub>18</sub>H<sub>16</sub>FO<sup>+</sup> (M+H)<sup>+</sup> 295.1241, found 295.1242.

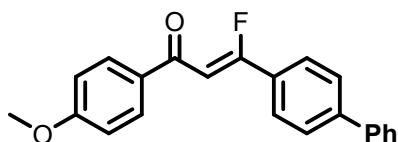**(*Z*)-3-([1,1'-biphenyl]-4-yl)-3-fluoro-1-(4-methoxyphenyl)prop-2-en-1-one (11):**

Yield 64%; 212 mg; white solid; mp 131-133°C; TLC (PE:EtOAc, 5:1 v/v): Rf= 0.3; <sup>1</sup>H NMR (400 MHz, CDCl<sub>3</sub>) δ 7.98 (d, *J* = 8.8 Hz, 2H), 7.79 (d, *J* = 8.4 Hz, 2H), 7.67 (d, *J* = 8.4 Hz, 2H), 7.61 (d, *J* = 7.6 Hz, 2H), 7.46 (t, *J* = 7.6 Hz, 2H), 7.40 (d, *J* = 7.2 Hz, 1H), 6.96



(d,  $J = 8.8$  Hz, 2H), 6.79 (d,  $J = 34.4$  Hz, 1H), 3.86 (s, 3H).  $^{13}\text{C}$  NMR (100 MHz,  $\text{CDCl}_3$ )  $\delta$  187.3, 164.4(d,  $J = 275.0$  Hz,  $^1J_{\text{CF}}$ ), 163.4, 144.1, 139.6, 131.4, 130.7, 129.7(d,  $J = 27.0$  Hz), 128.9, 128.1, 127.4(d,  $J = 2.0$  Hz), 127.0, 126. (d,  $J = 8.0$  Hz), 113.7, 101.6(d,  $J = 8.0$  Hz), 55.4.  $^{19}\text{F}$  NMR (376 MHz,  $\text{CDCl}_3$ )  $\delta$  -98.4. HRMS (ESI)  $m/z$  calcd for  $\text{C}_{22}\text{H}_{18}\text{FO}_2^+$  (M+H) $^+$  333.1285, found 333.1281.

## Crystallographic data and molecular structure of **3i**

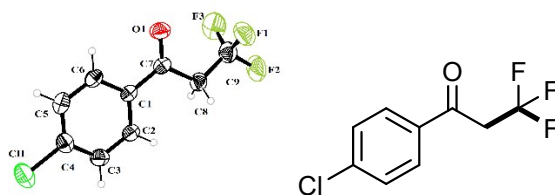

**Figure S1.** X-ray crystal structure of **3i** with 30% probability ellipsoids (ORTEP) Crystal Data for Compound **3i**: CCDC 2182469 contains the supplementary crystallographic data for this paper. These data can be obtained free of charge from The Cambridge Crystallographic.

Sample preparation: In a 10 mL glass bottle, 15 mg of pure **3i** was completely dissolved in the mixed solvent of 3 mL CHCl<sub>2</sub>, and then 2 mL of n-hexane was added slowly. After a week of solvent evaporation, some yellow transparent crystals were obtained. The crystals were mounted on a glass fiber for diffraction experiments. Intensity data were collected on a Bruker SMART APEX CCD diffractometer with Mo K $\alpha$  radiation (0.71073 Å) at room temperature.

---

|                                                               |                          |                                      |                          |
|---------------------------------------------------------------|--------------------------|--------------------------------------|--------------------------|
| Bond precision:                                               | C-C = 0.0037 Å           | Wavelength=0.71073                   |                          |
| Cell:                                                         | a=15.120 (3)<br>alpha=90 | b=5.9966 (13)<br>beta=90             | c=20.980 (4)<br>gamma=90 |
| Temperature:                                                  | 296 K                    |                                      |                          |
|                                                               | Calculated               | Reported                             |                          |
| Volume                                                        | 1902.2 (7)               | 1902.3 (7)                           |                          |
| Space group                                                   | P b c a                  | P b c a                              |                          |
| Hall group                                                    | -P 2ac 2ab               | -P 2ac 2ab                           |                          |
| Moiety formula                                                | C9 H6 Cl F3 O            | C9 H6 Cl F3 O                        |                          |
| Sum formula                                                   | C9 H6 Cl F3 O            | C9 H6 Cl F3 O                        |                          |
| Mr                                                            | 222.59                   | 222.59                               |                          |
| Dx, g cm <sup>-3</sup>                                        | 1.554                    | 1.554                                |                          |
| Z                                                             | 8                        | 8                                    |                          |
| Mu (mm <sup>-1</sup> )                                        | 0.409                    | 0.409                                |                          |
| F000                                                          | 896.0                    | 896.0                                |                          |
| F000'                                                         | 897.84                   |                                      |                          |
| h, k, lmax                                                    | 18, 7, 25                | 18, 7, 25                            |                          |
| Nref                                                          | 1867                     | 1861                                 |                          |
| Tmin, Tmax                                                    | 0.943, 0.960             | 0.561, 0.746                         |                          |
| Tmin'                                                         | 0.940                    |                                      |                          |
| Correction method= # Reported T Limits: Tmin=0.561 Tmax=0.746 |                          |                                      |                          |
| AbsCorr = MULTI-SCAN                                          |                          |                                      |                          |
| Data completeness=                                            | 0.997                    | Theta (max)= 25.991                  |                          |
| R(reflections)=                                               | 0.0534 ( 1527)           | wR2 (reflections)=<br>0.1467 ( 1861) |                          |
| S =                                                           | 1.067                    | Npar= 128                            |                          |

## References

- (1) 1. (a) J. Vaitla, A. Bayer and K. H. Hopmann, *Angew. Chem. Int. Ed.*, 2017, 56, 4277; (b) M. Barday, C. Janot, N. R. Halcovitch, J. Muir and C. Aïssa, *Angew. Chem. Int. Ed.*, 2017, 56, 13117; (c) Y. Xu, X. Zhou, G. Zheng and X. Li, *Org. Lett.*, 2017, 19, 5256; (d) C. Janot, P. Palamini, B. C. Dobson, J. Muir and C. Aïssa, *Org. Lett.*, 2018, 21, 296.

## NMR spectra of compounds

$^1\text{H}$  NMR (400 MHz,  $\text{CDCl}_3$ ) of compound **3a**

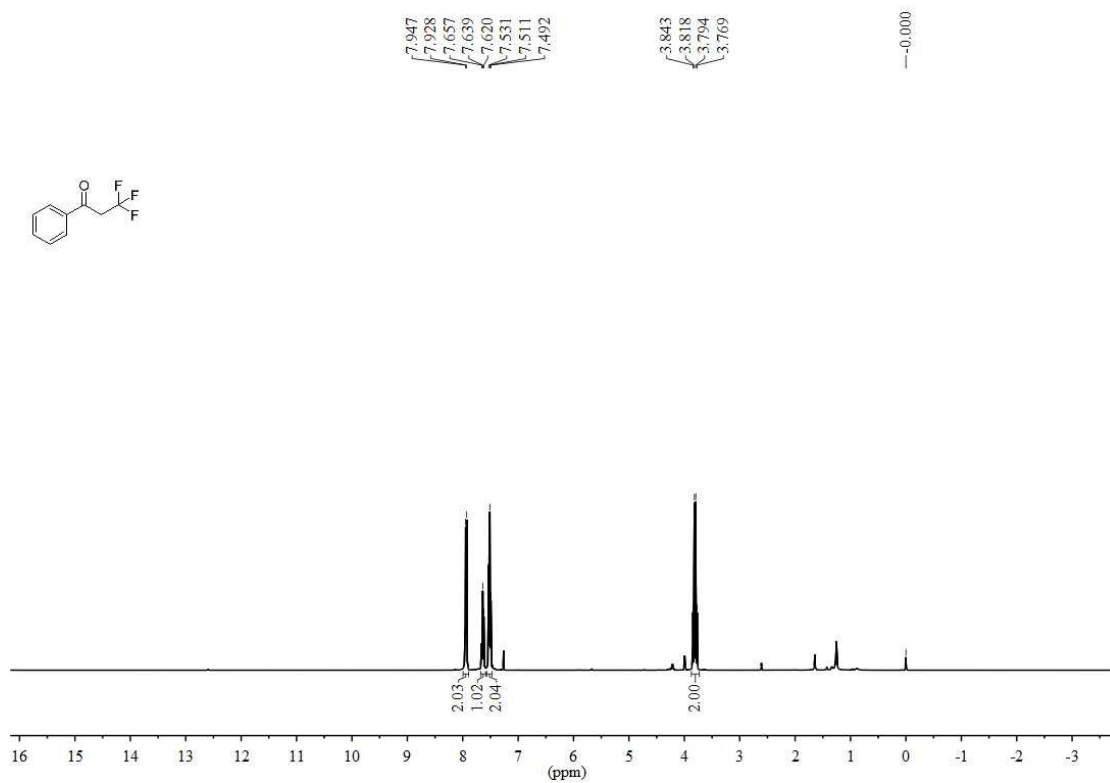

$^{13}\text{C}\{^1\text{H}\}$  NMR (100 MHz,  $\text{CDCl}_3$ ) of compound **3a**

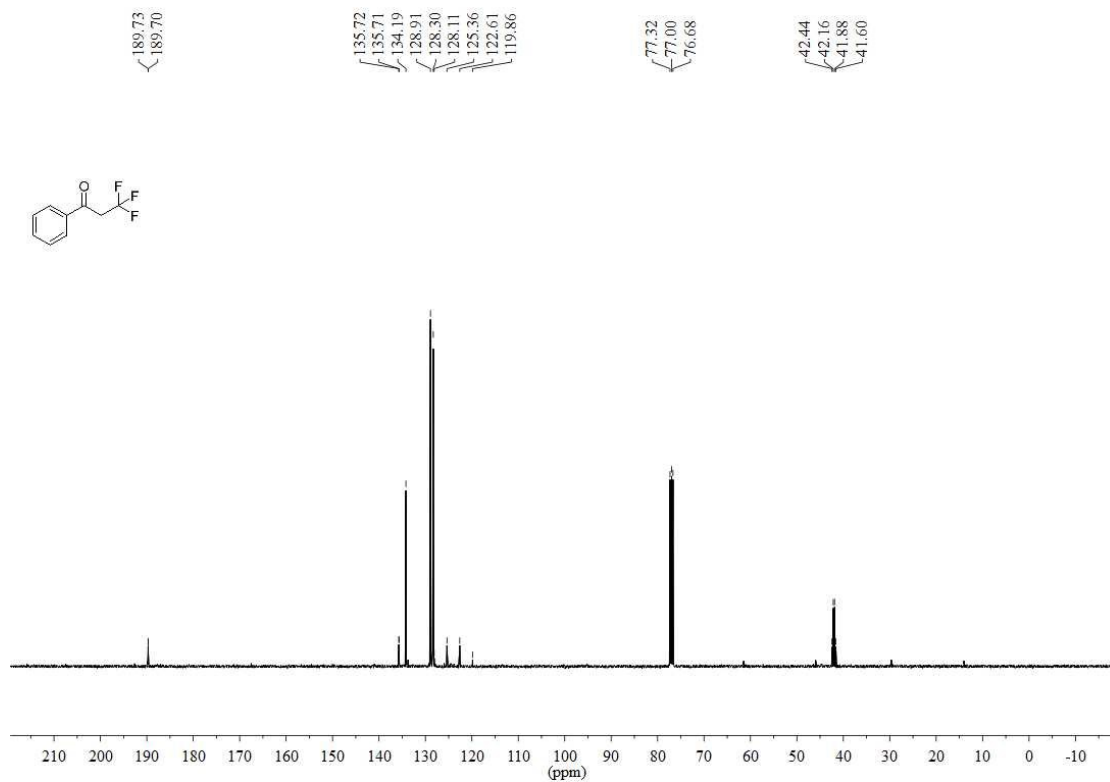

$^{19}\text{F}$  NMR (376 MHz,  $\text{CDCl}_3$ ) of compound **3a**

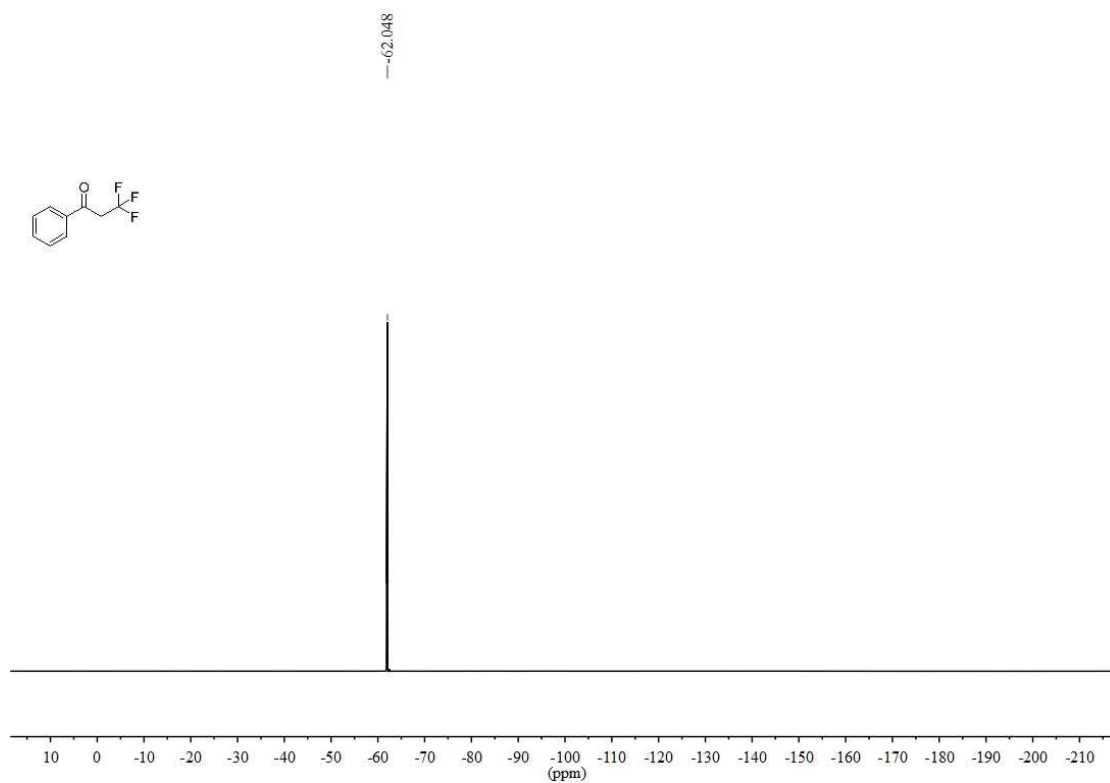

$^1\text{H}$  NMR (400 MHz,  $\text{CDCl}_3$ ) of compound **3b**

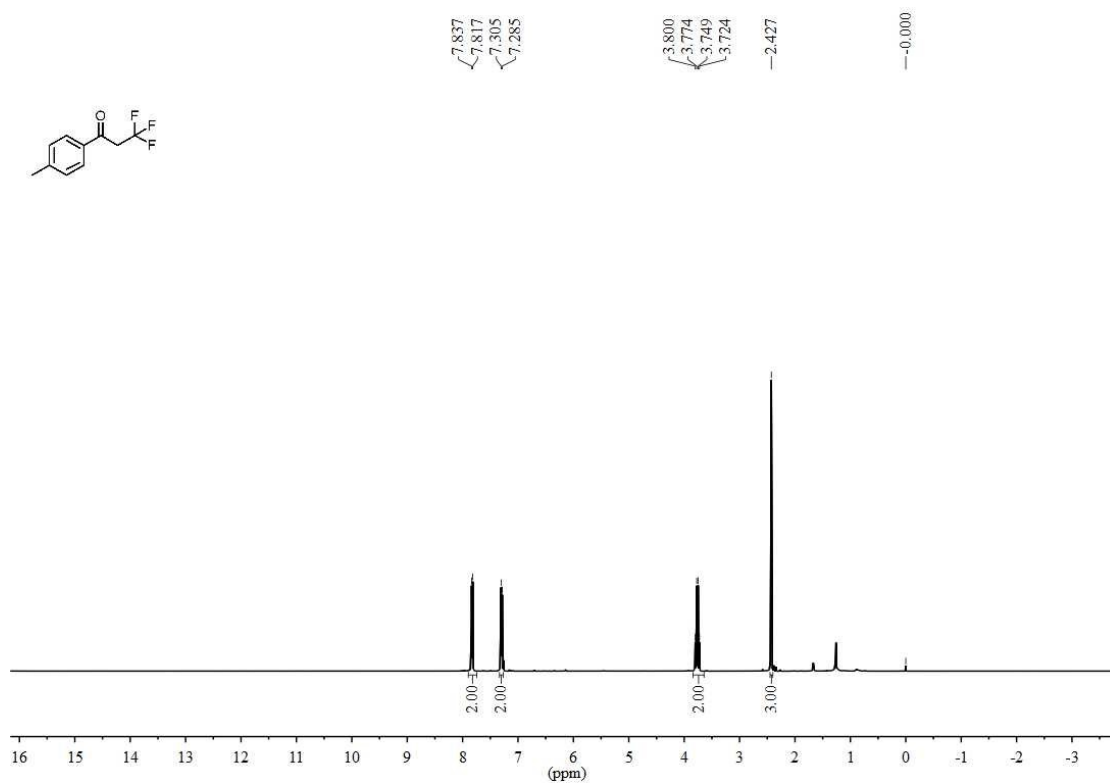

$^{13}\text{C}\{^1\text{H}\}$  NMR (100 MHz,  $\text{CDCl}_3$ ) of compound **3b**

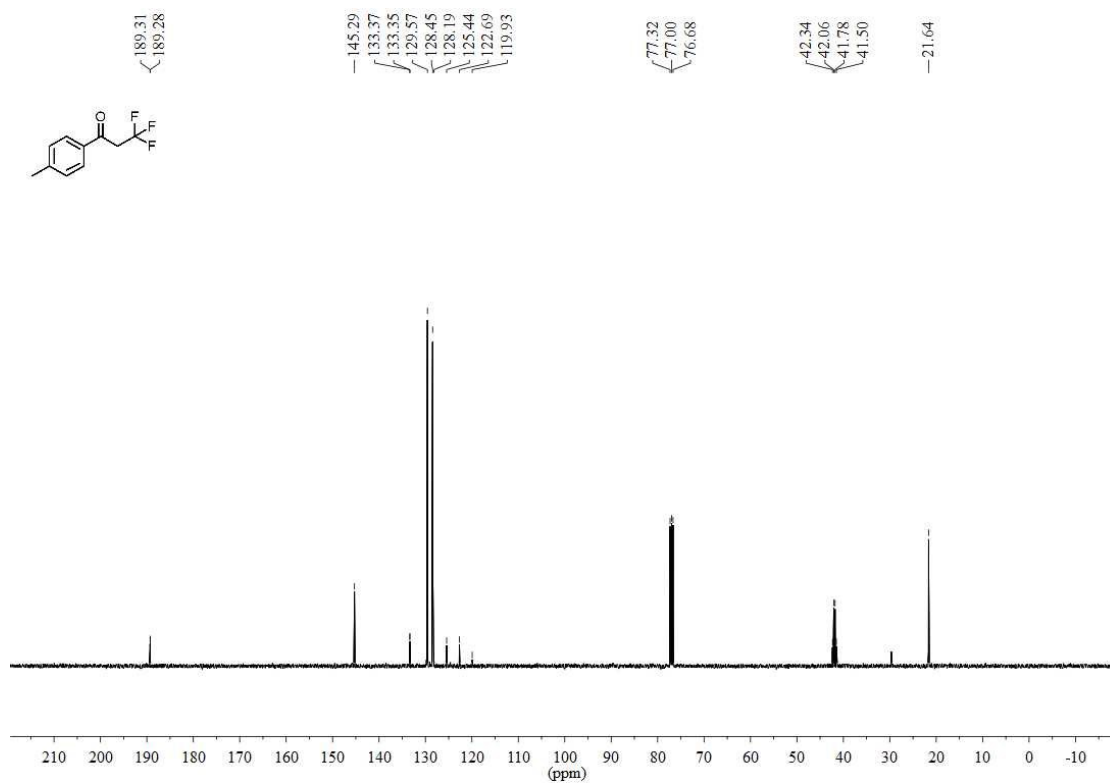

$^{19}\text{F}$  NMR (376 MHz,  $\text{CDCl}_3$ ) of compound **3b**

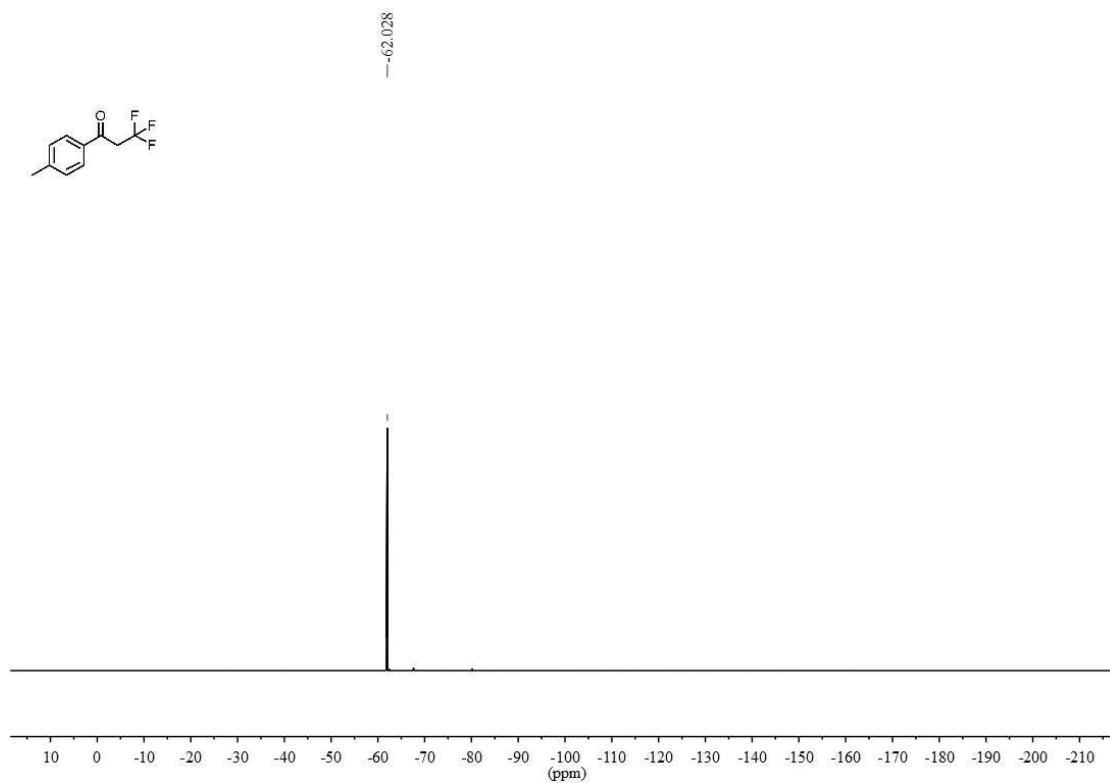

$^1\text{H}$  NMR (400 MHz,  $\text{CDCl}_3$ ) of compound **3c**

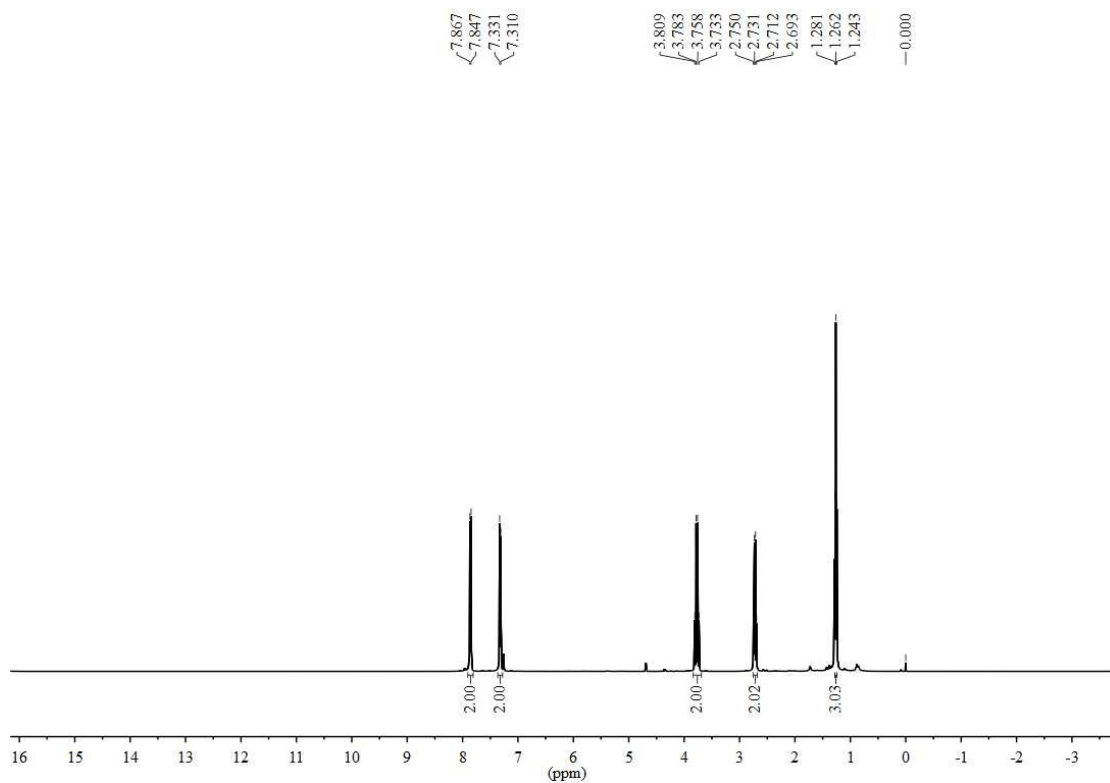

$^{13}\text{C}\{^1\text{H}\}$  NMR (100 MHz,  $\text{CDCl}_3$ ) of compound **3c**

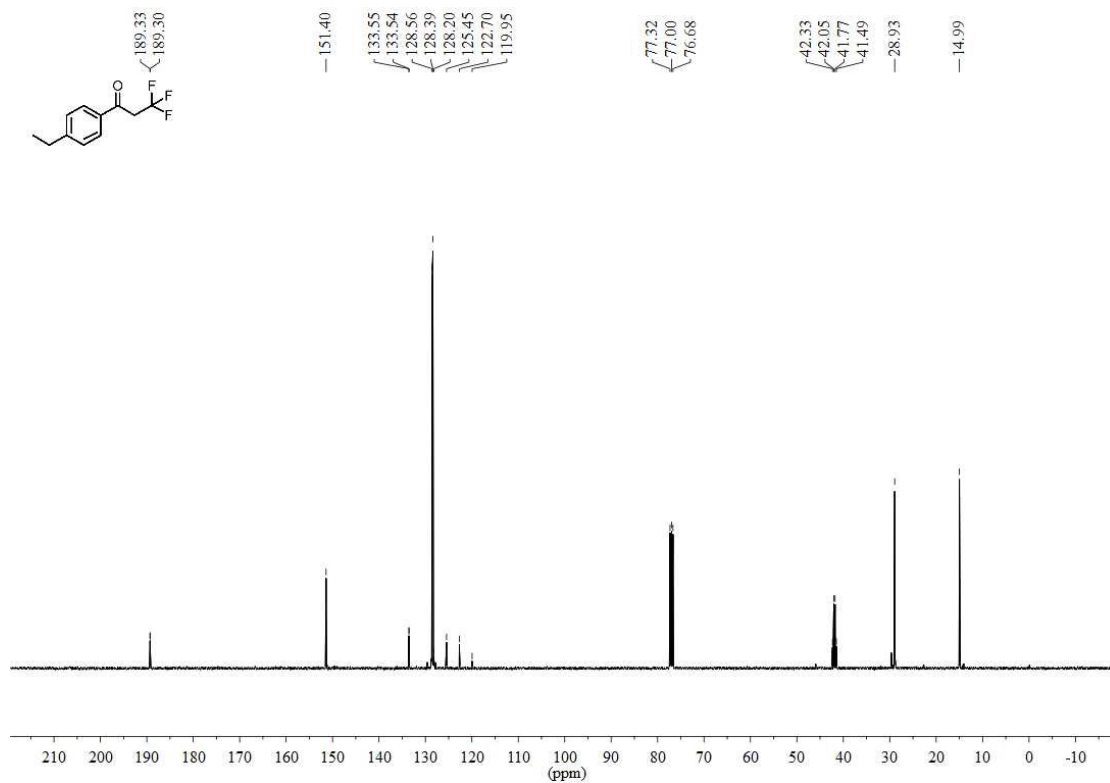

$^{19}\text{F}$  NMR (376 MHz,  $\text{CDCl}_3$ ) of compound **3c**

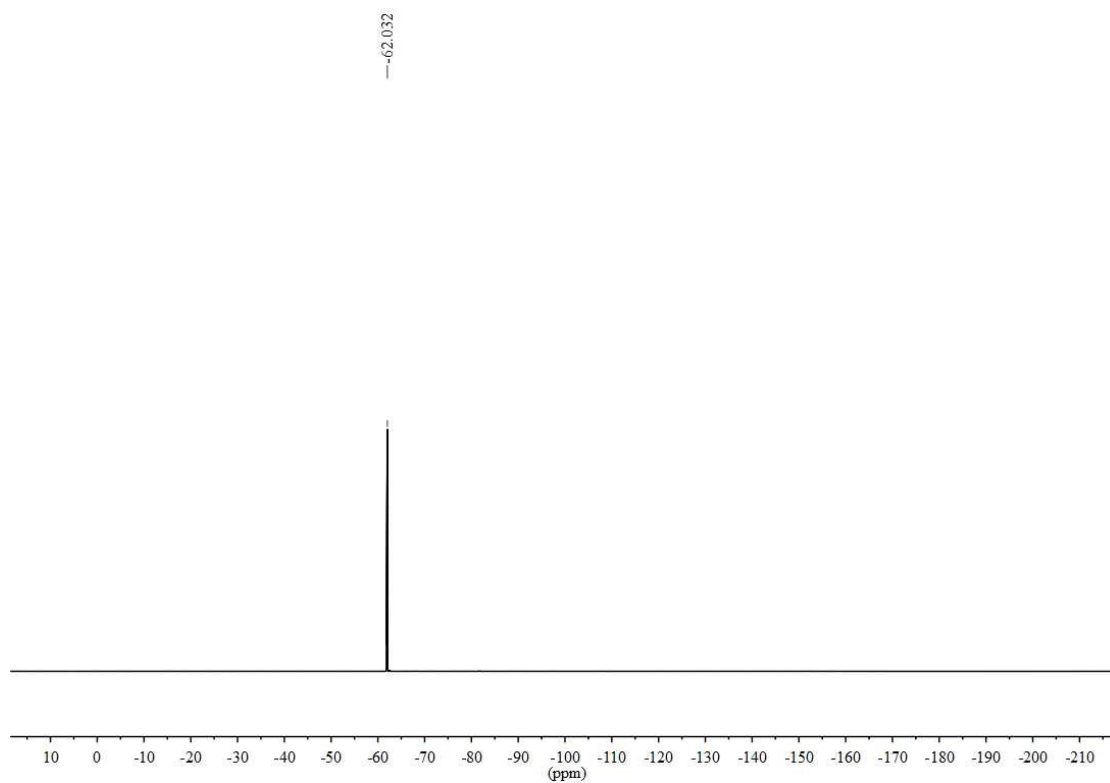

$^1\text{H}$  NMR (400 MHz,  $\text{CDCl}_3$ ) of compound **3d**

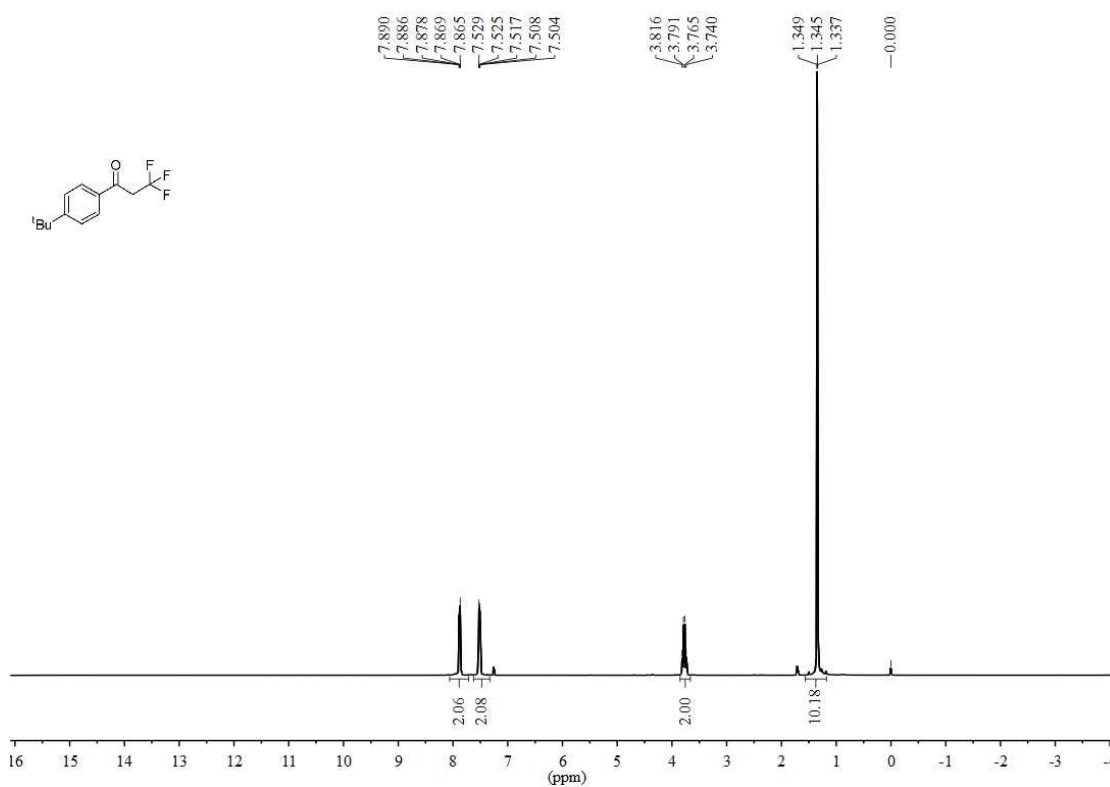

$^{13}\text{C}\{^1\text{H}\}$  NMR (100 MHz,  $\text{CDCl}_3$ ) of compound **3d**

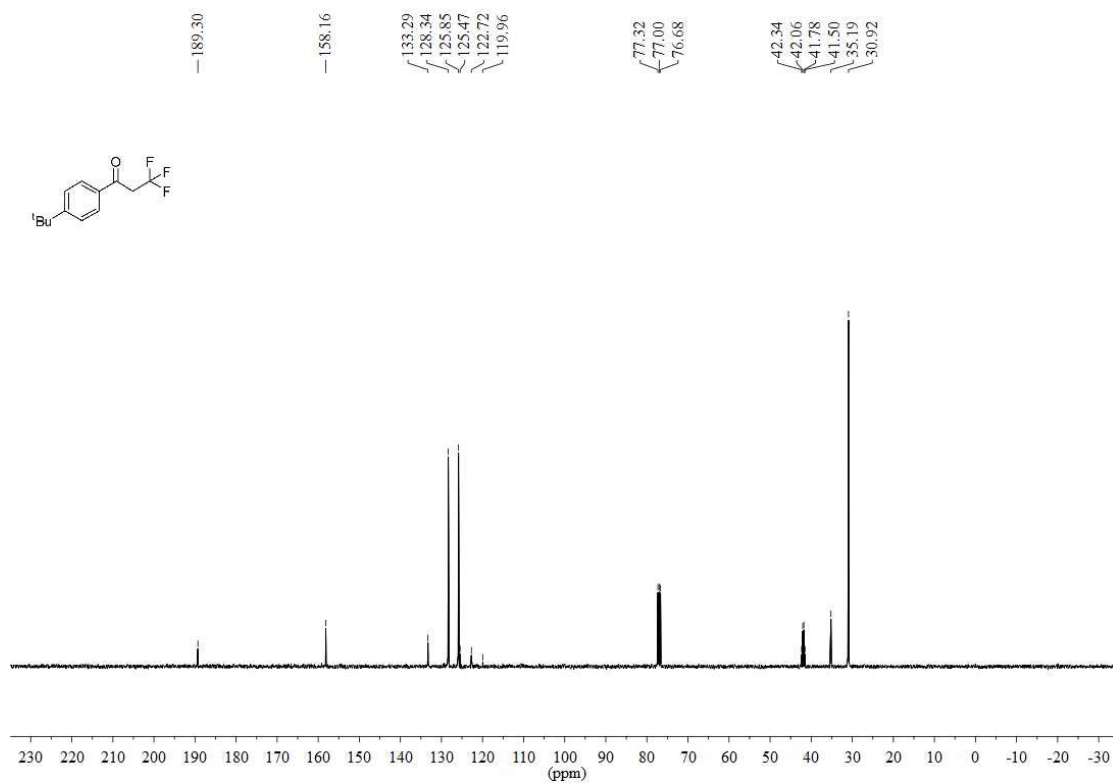

$^{19}\text{F}$  NMR (376 MHz,  $\text{CDCl}_3$ ) of compound **3d**

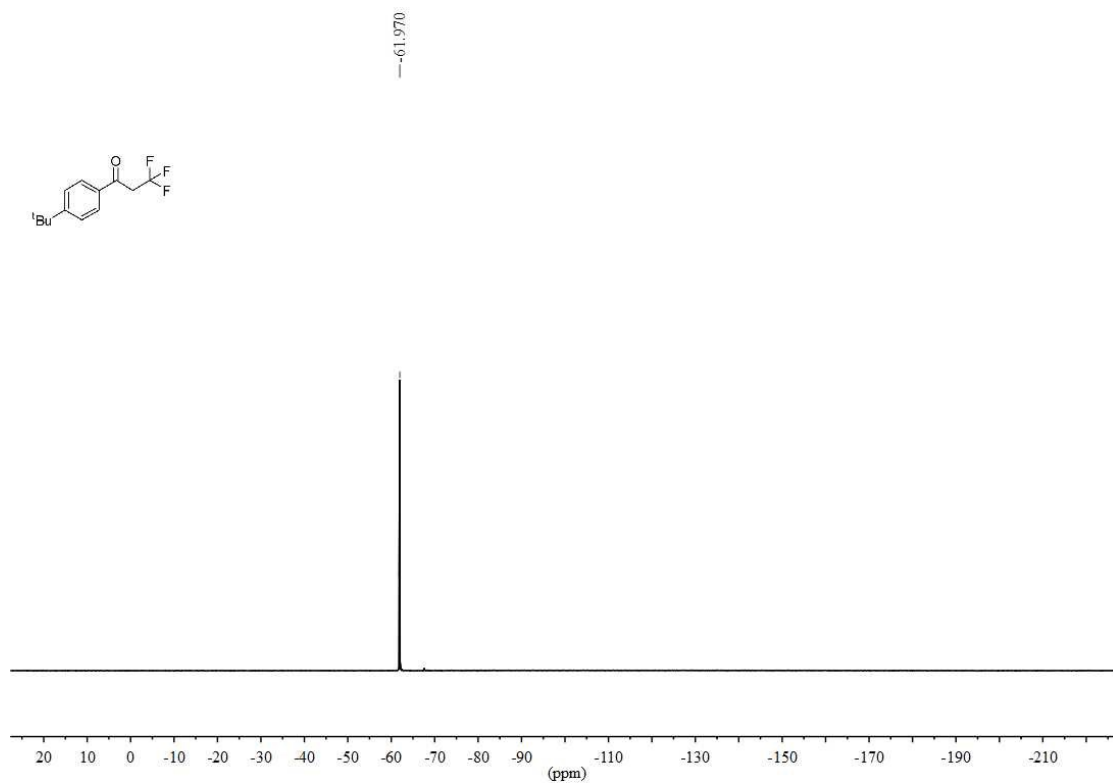

$^1\text{H}$  NMR (400 MHz,  $\text{CDCl}_3$ ) of compound **3e**



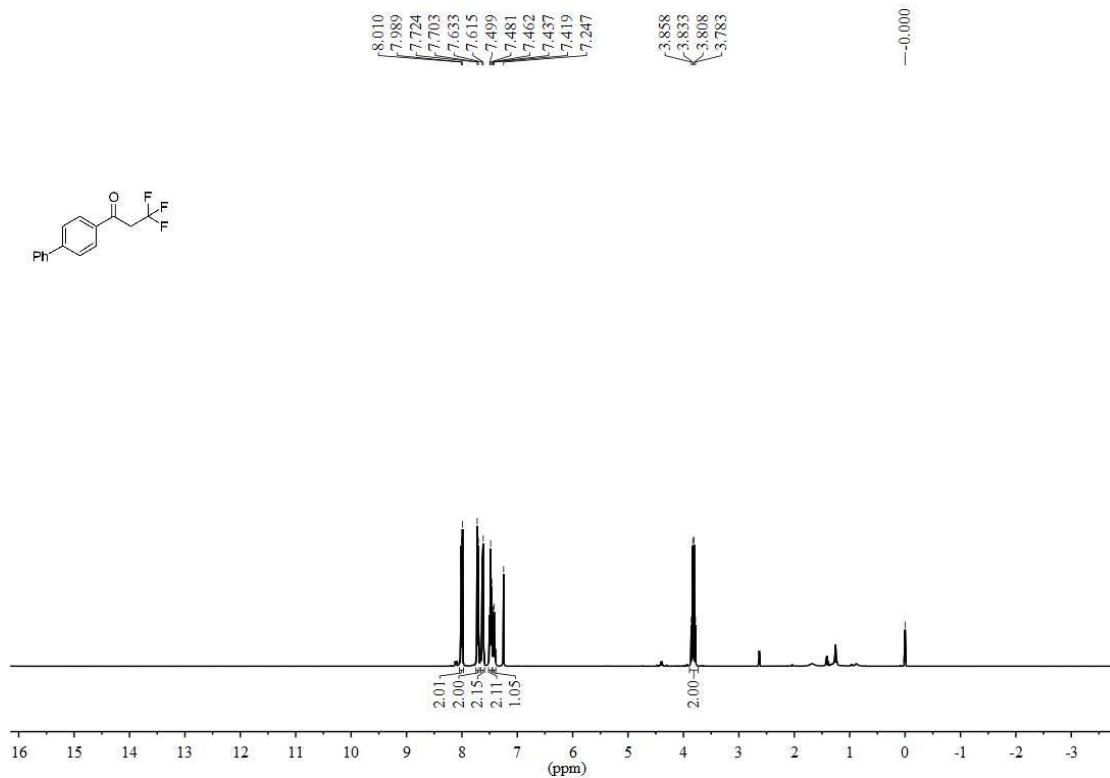

$^{13}\text{C}\{^1\text{H}\}$  NMR (100 MHz,  $\text{CDCl}_3$ ) of compound **3e**

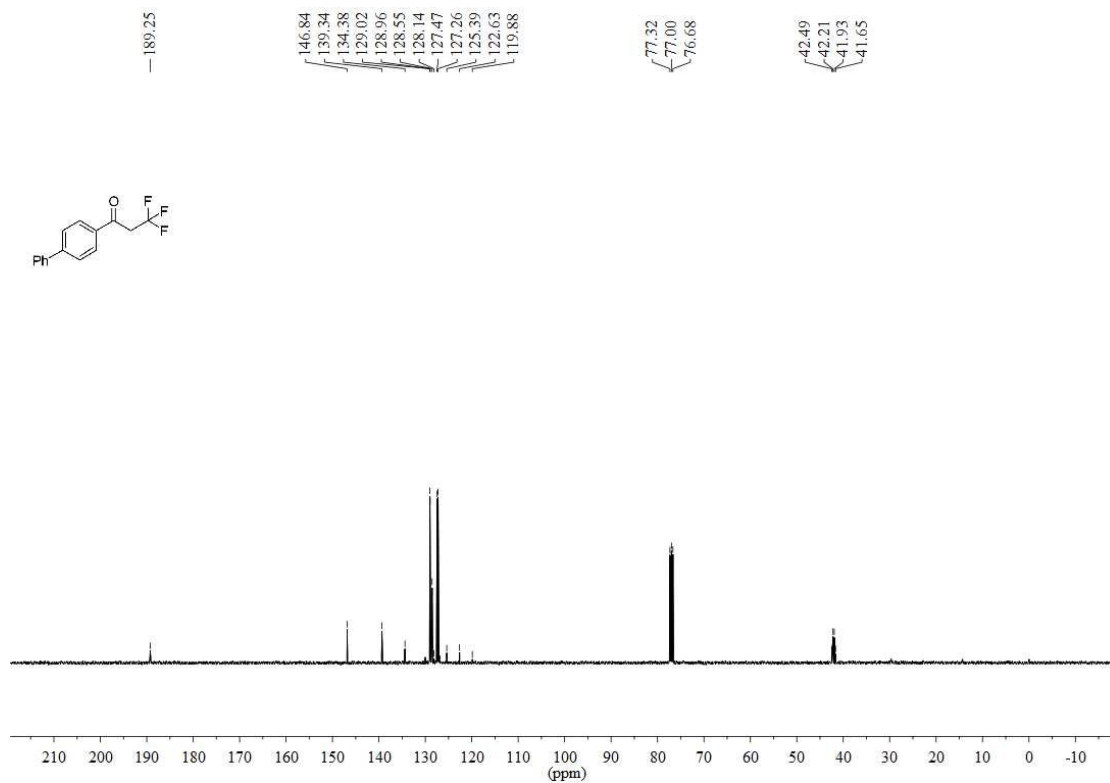

$^{19}\text{F}$  NMR (376 MHz,  $\text{CDCl}_3$ ) of compound **3e**

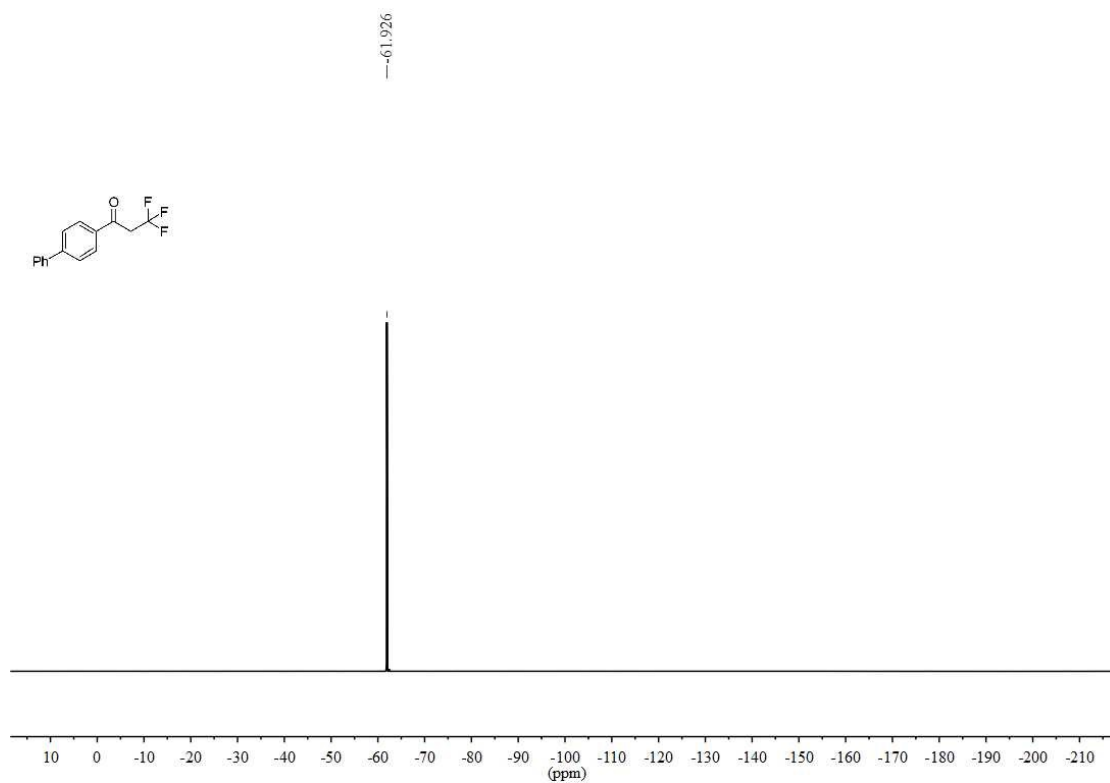

$^1\text{H}$  NMR (400 MHz,  $\text{CDCl}_3$ ) of compound **3f**

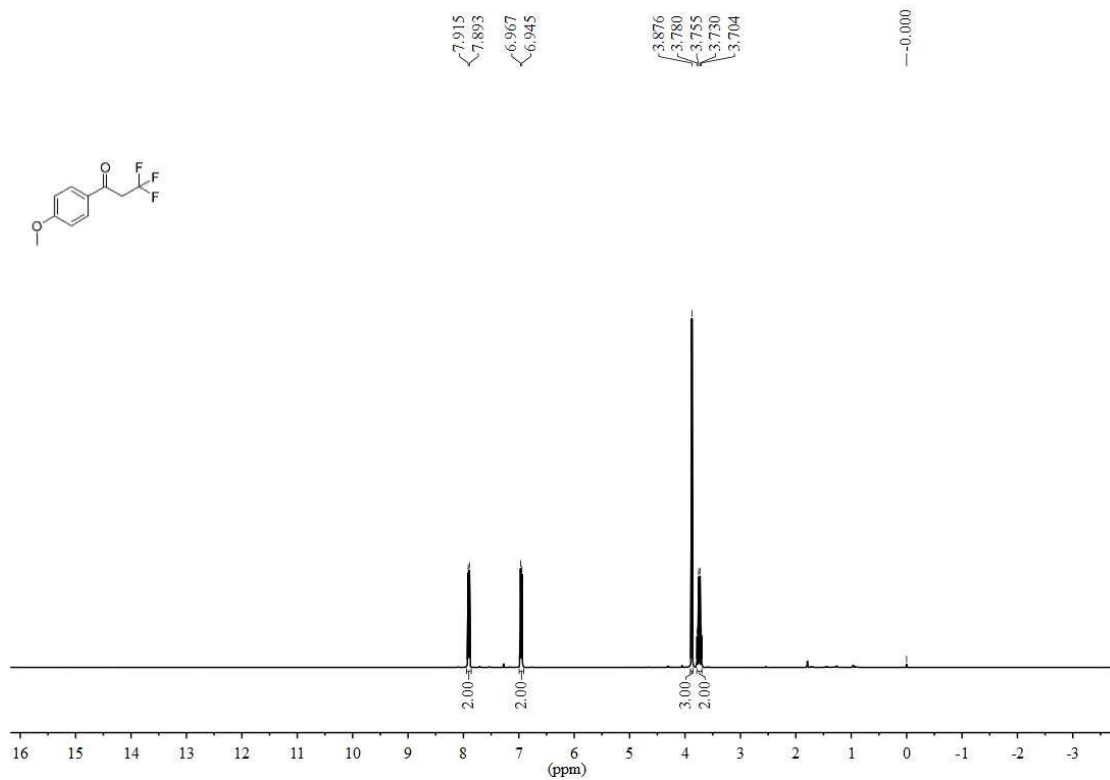

$^{13}\text{C}\{^1\text{H}\}$  NMR (100 MHz,  $\text{CDCl}_3$ ) of compound **3f**

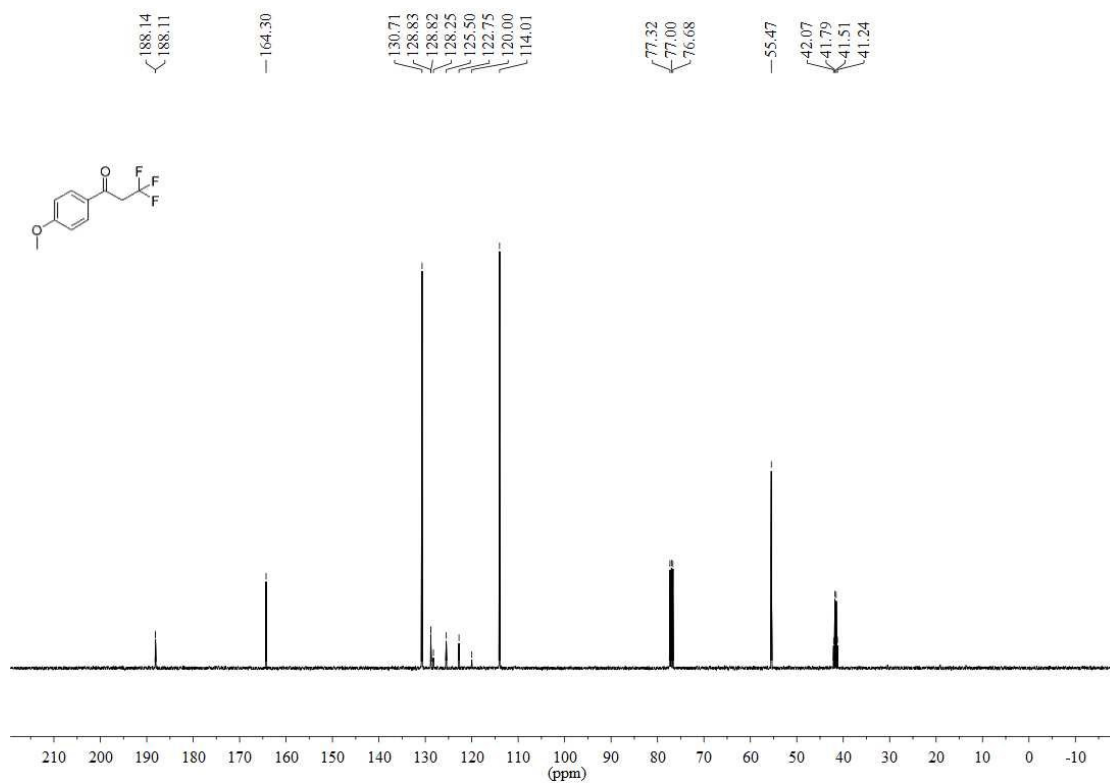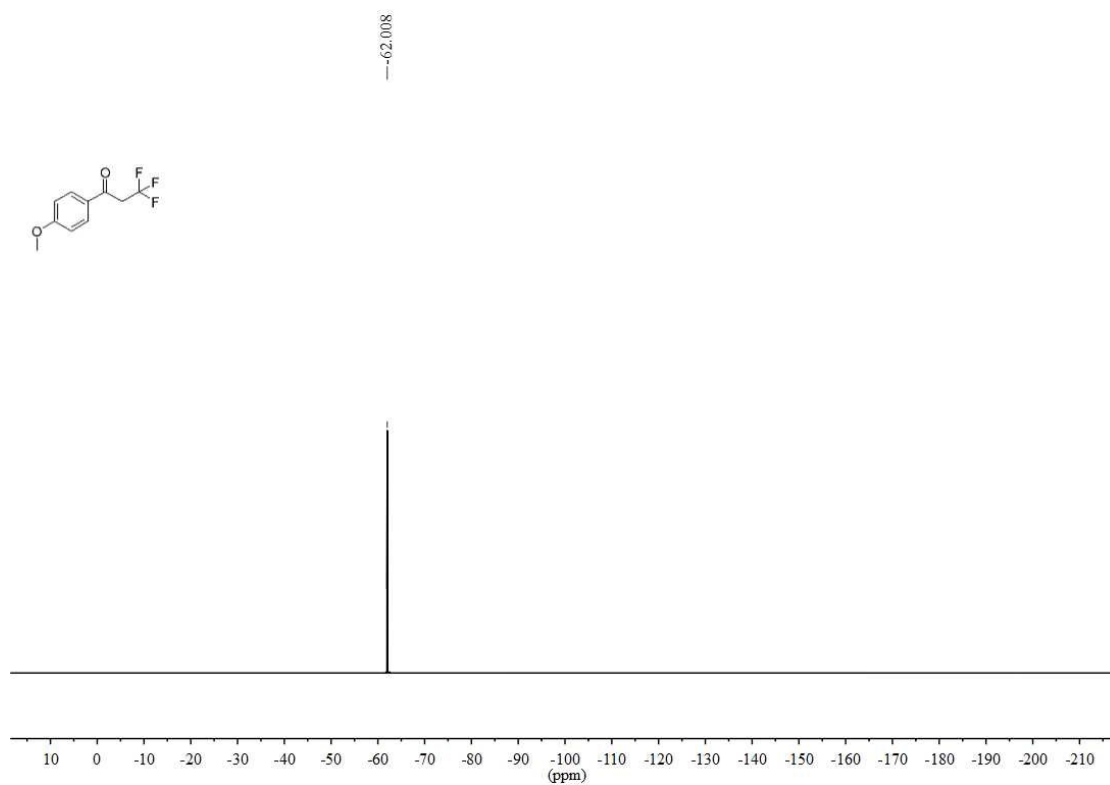

$^1\text{H}$  NMR (400 MHz,  $\text{CDCl}_3$ ) of compound **3g**

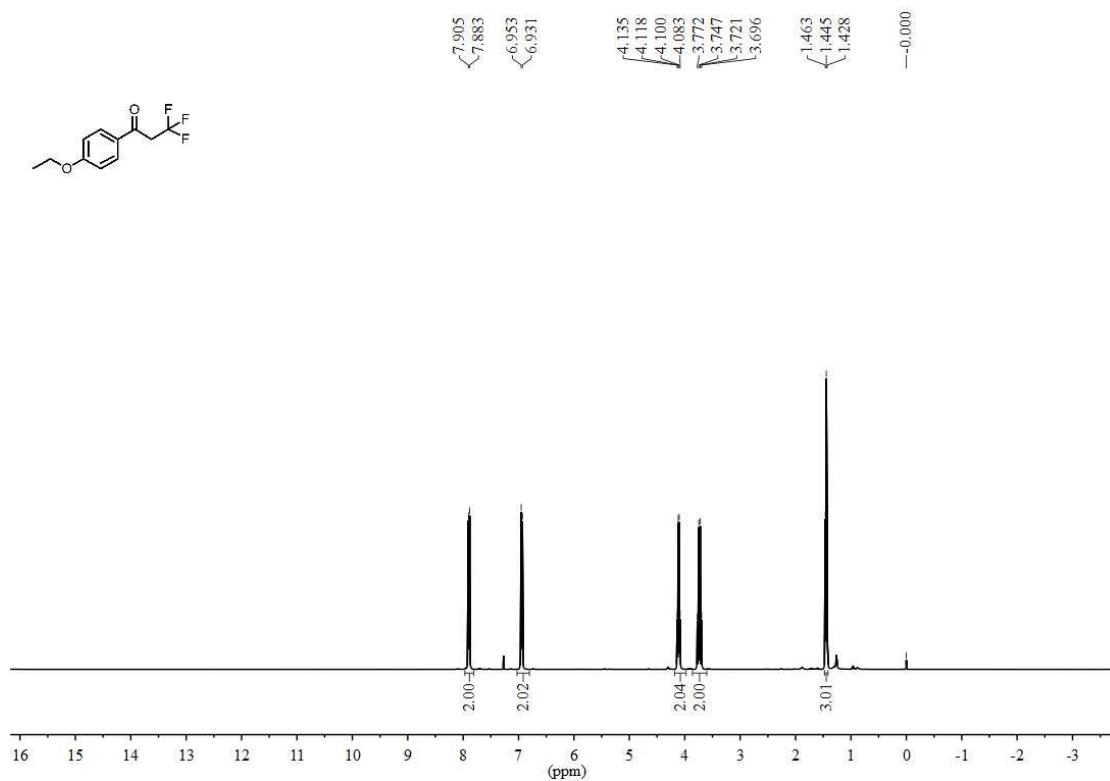

$^{13}\text{C}\{^1\text{H}\}$  NMR (100 MHz,  $\text{CDCl}_3$ ) of compound **3g**

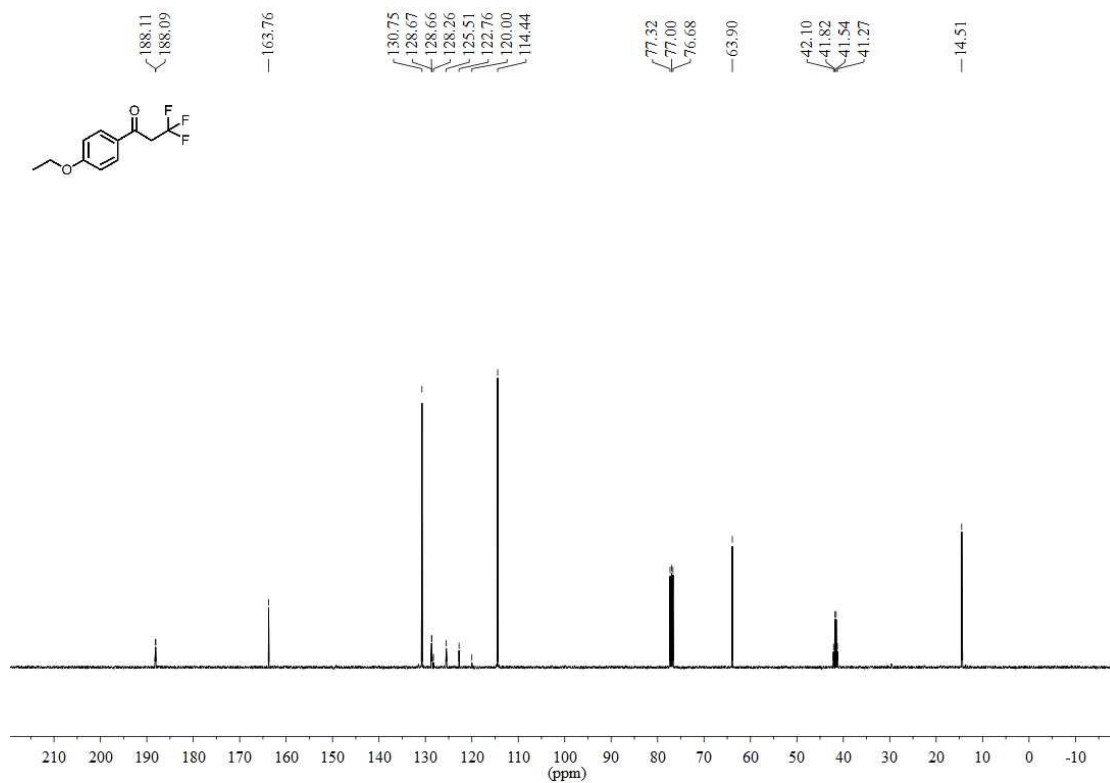

$^{19}\text{F}$  NMR (376 MHz,  $\text{CDCl}_3$ ) of compound **3g**

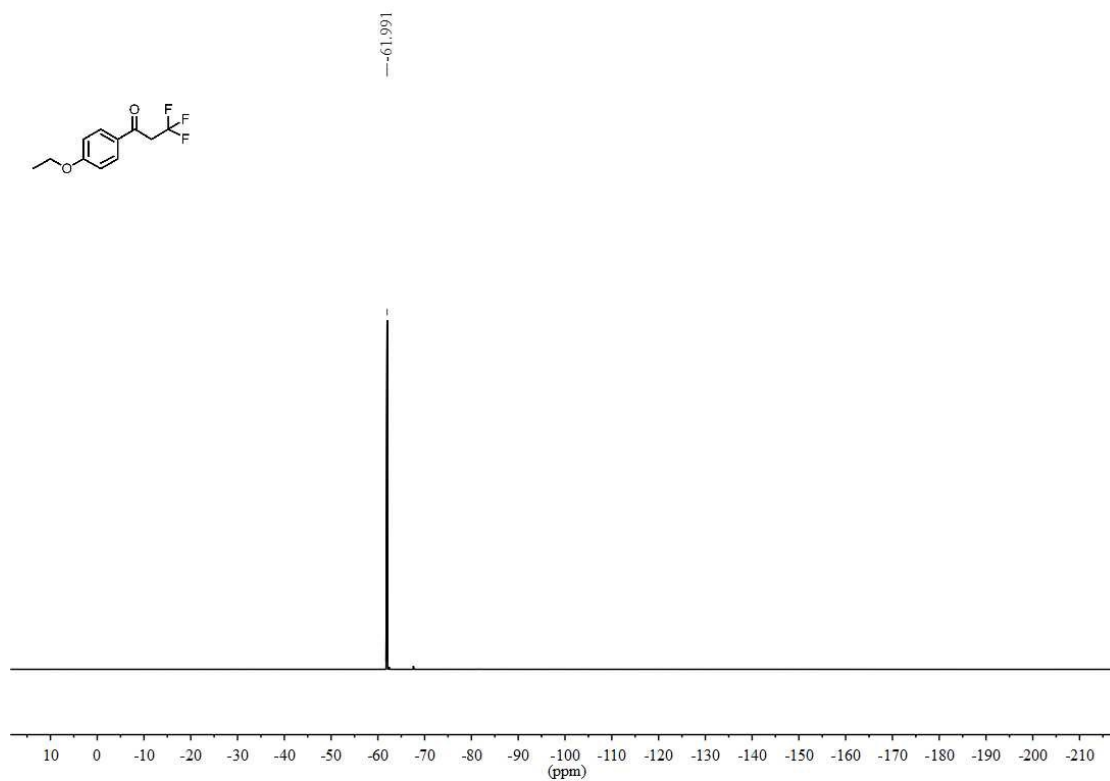

$^1\text{H}$  NMR (400 MHz,  $\text{CDCl}_3$ ) of compound **3h**

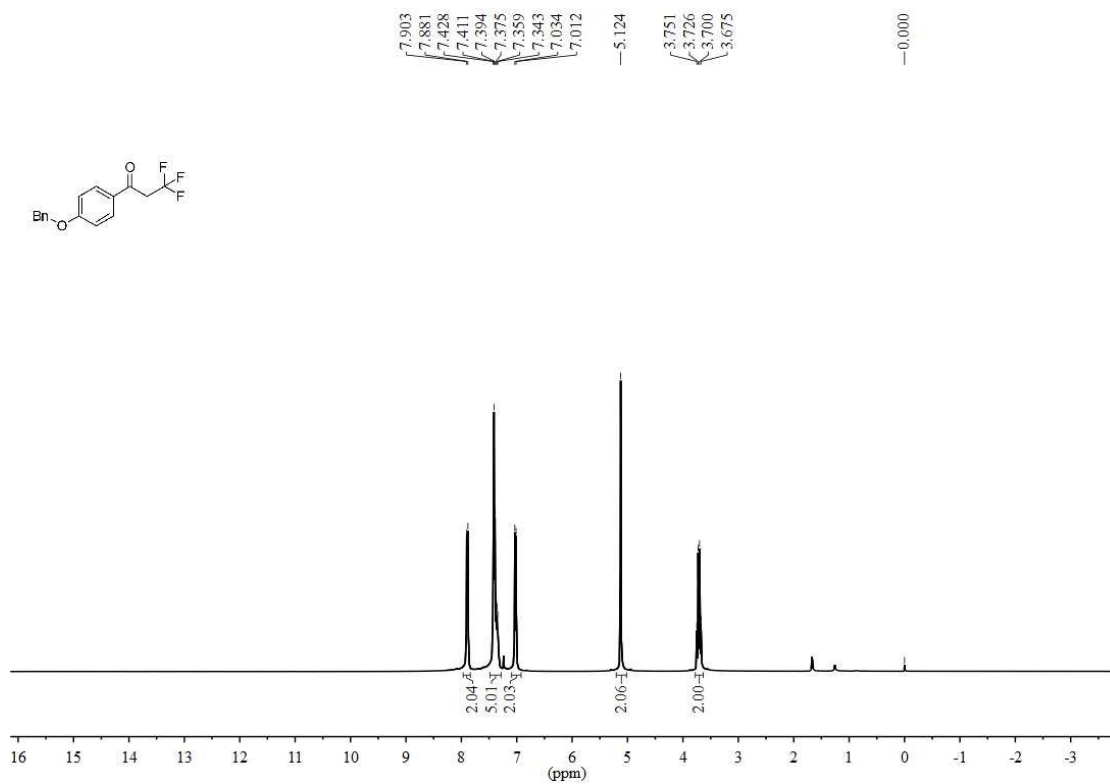

$^{13}\text{C}\{^1\text{H}\}$  NMR (100 MHz,  $\text{CDCl}_3$ ) of compound **3h**

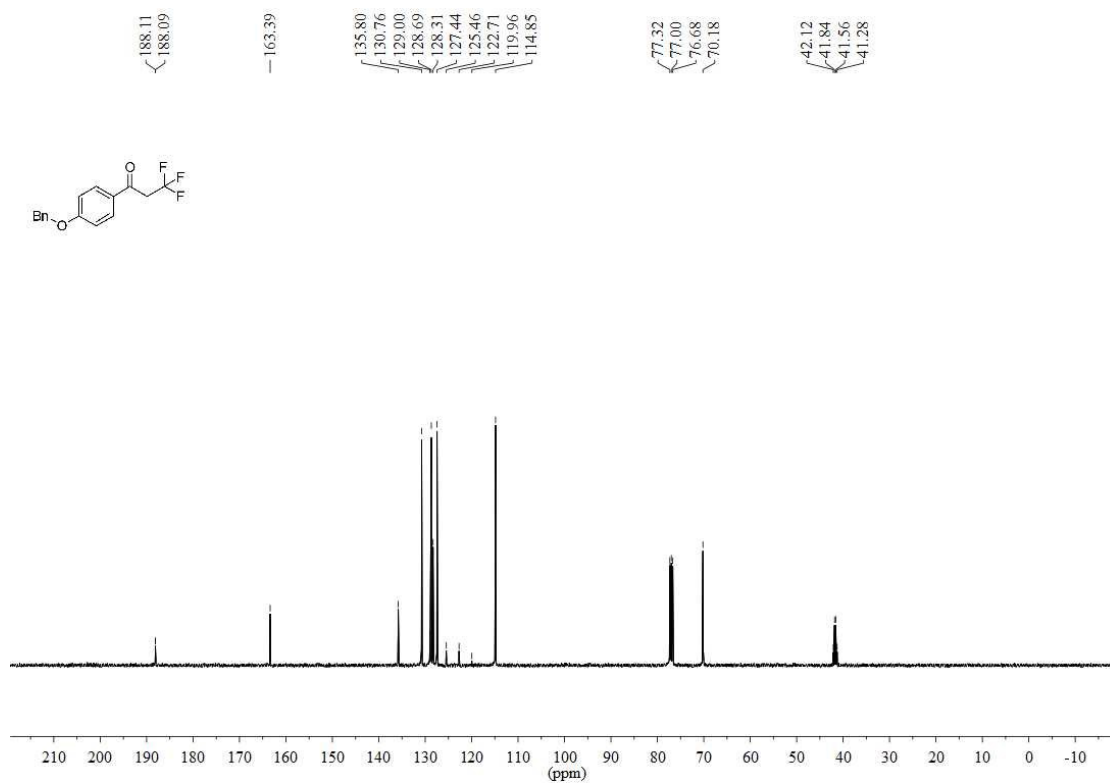

$^{19}\text{F}$  NMR (376 MHz,  $\text{CDCl}_3$ ) of compound **3h**

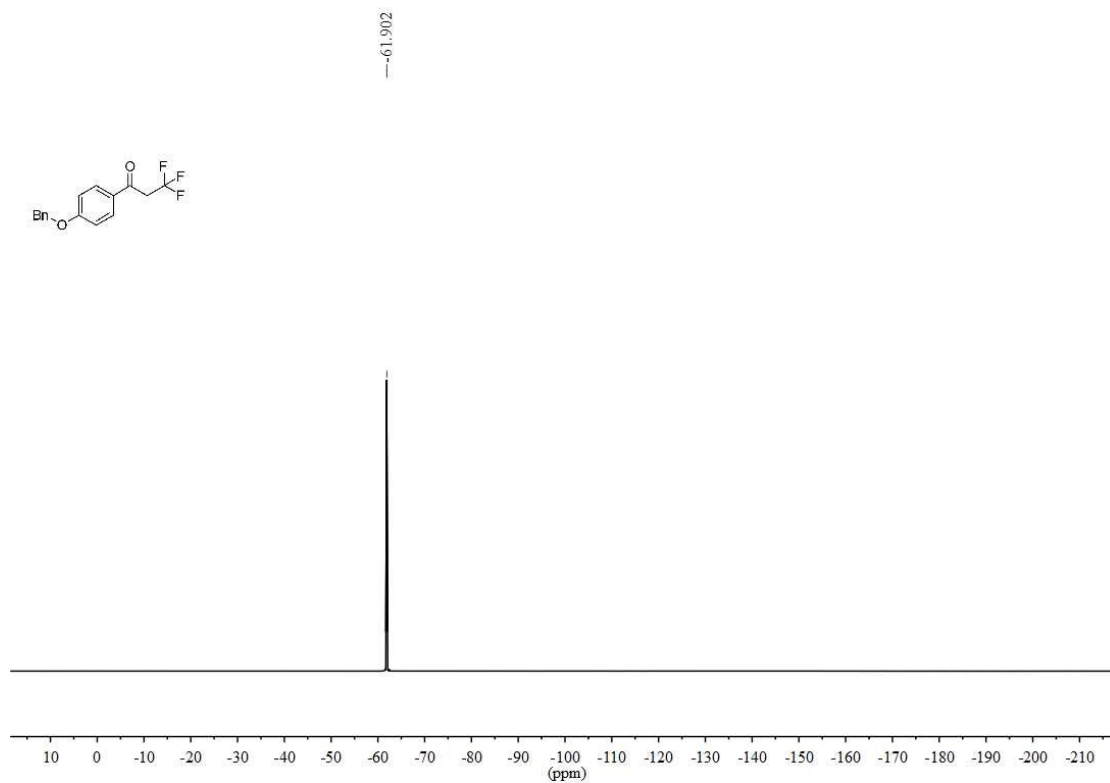

$^1\text{H}$  NMR (400 MHz,  $\text{CDCl}_3$ ) of compound **3i**

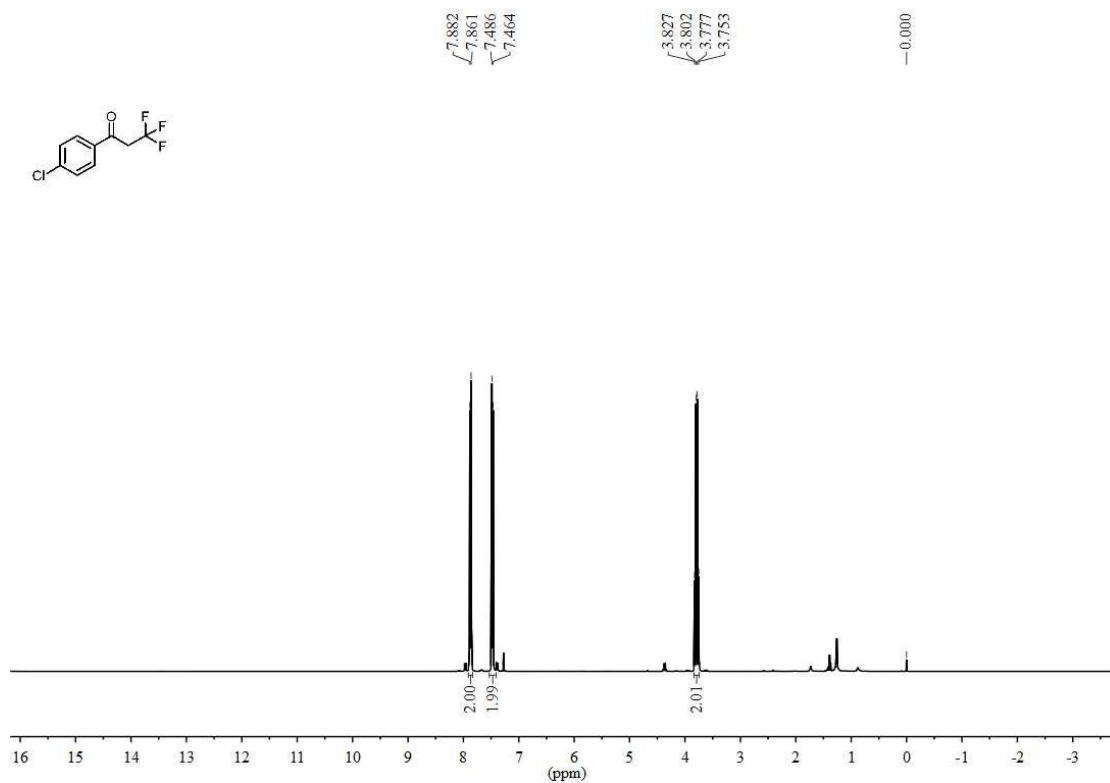

$^{13}\text{C}\{^1\text{H}\}$  NMR (100 MHz,  $\text{CDCl}_3$ ) of compound **3i**

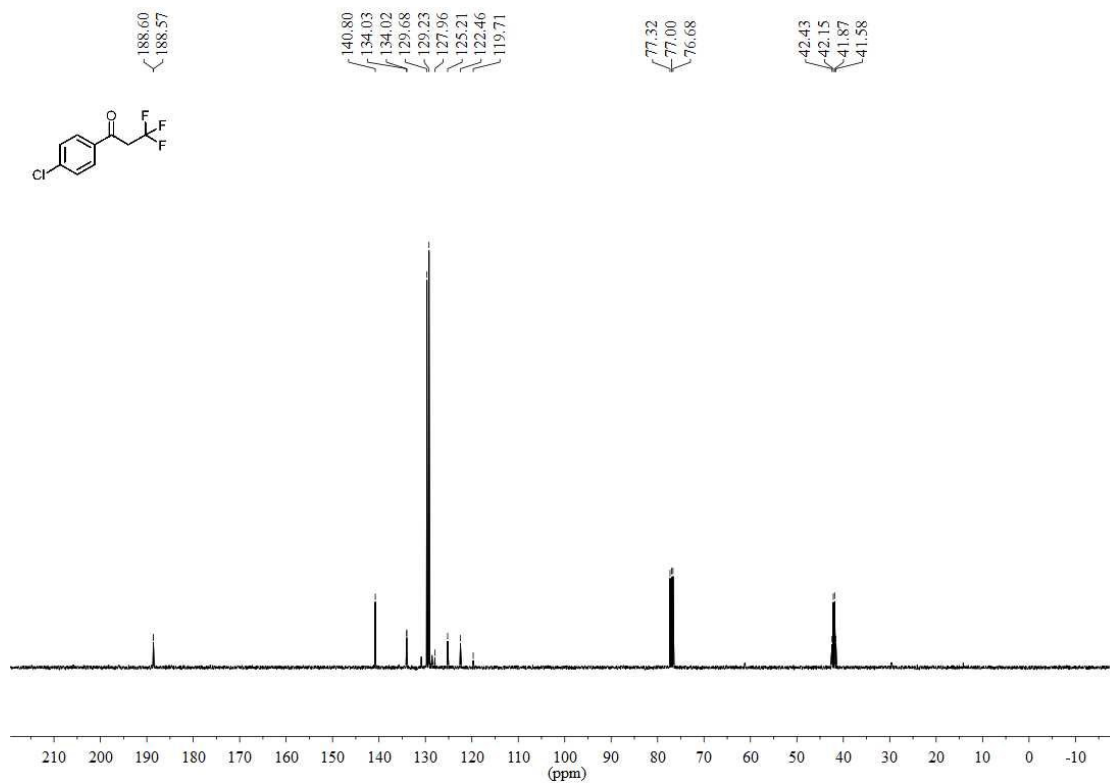

$^{19}\text{F}$  NMR (376 MHz,  $\text{CDCl}_3$ ) of compound **3i**

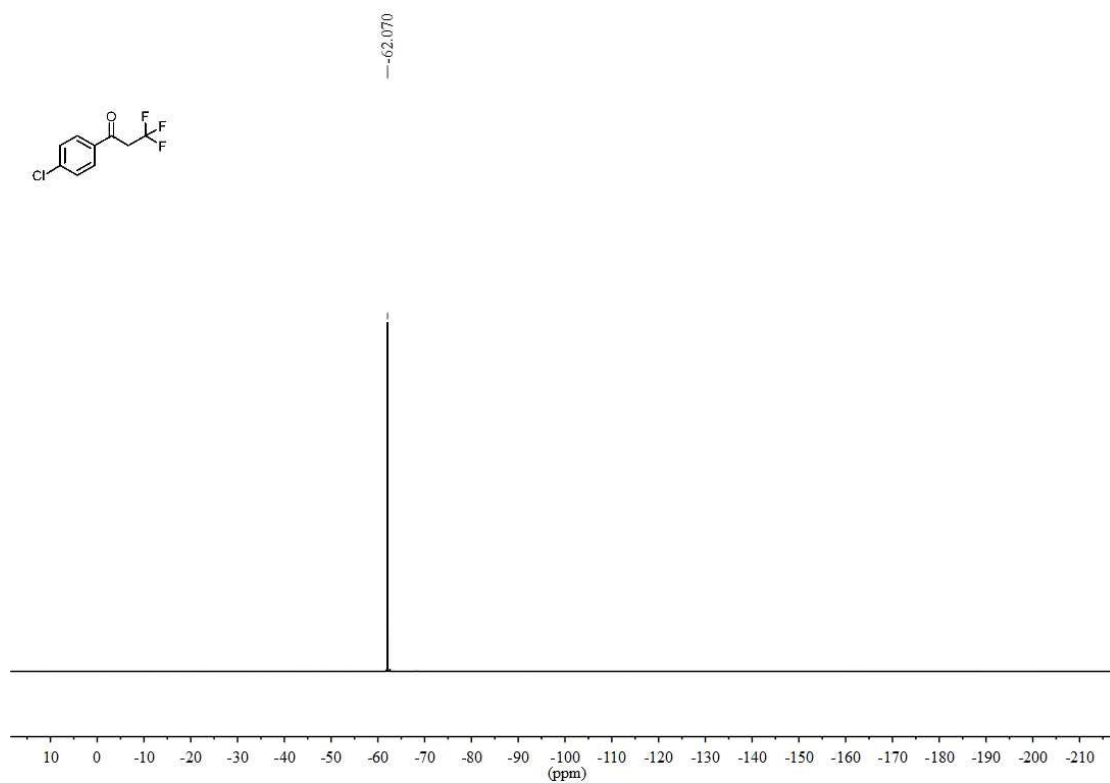

$^1\text{H}$  NMR (400 MHz,  $\text{CDCl}_3$ ) of compound **3j**

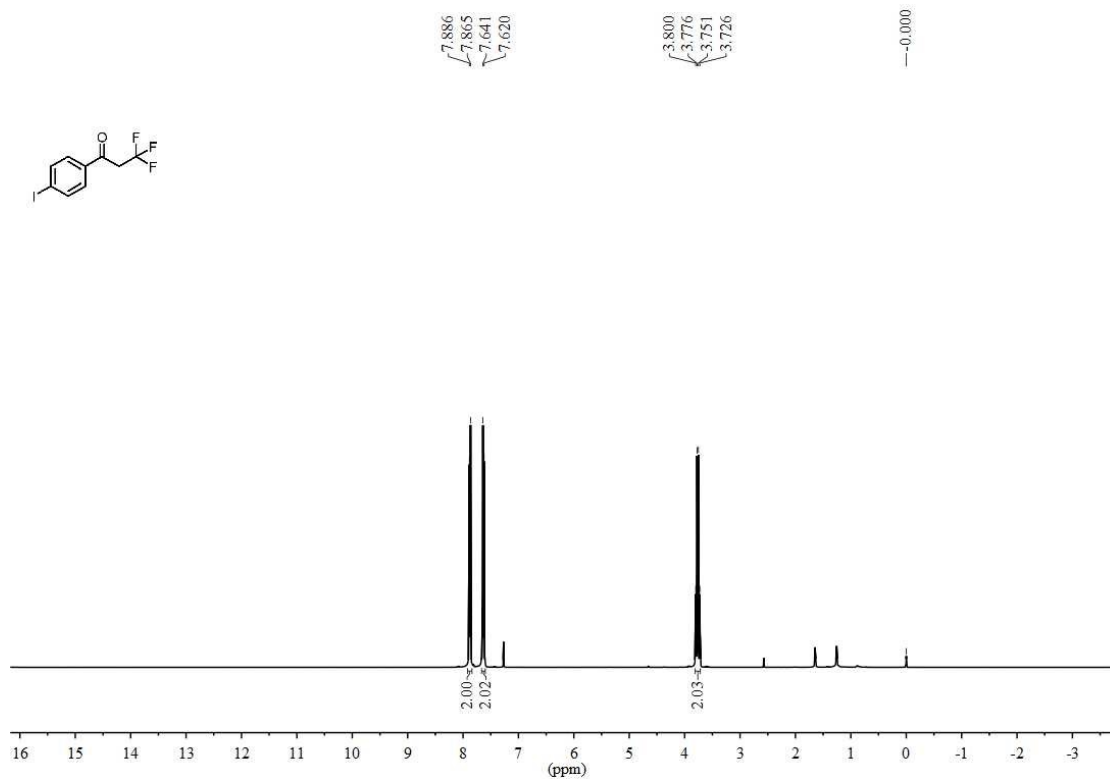

$^{13}\text{C}\{^1\text{H}\}$  NMR (100 MHz,  $\text{CDCl}_3$ ) of compound **3j**



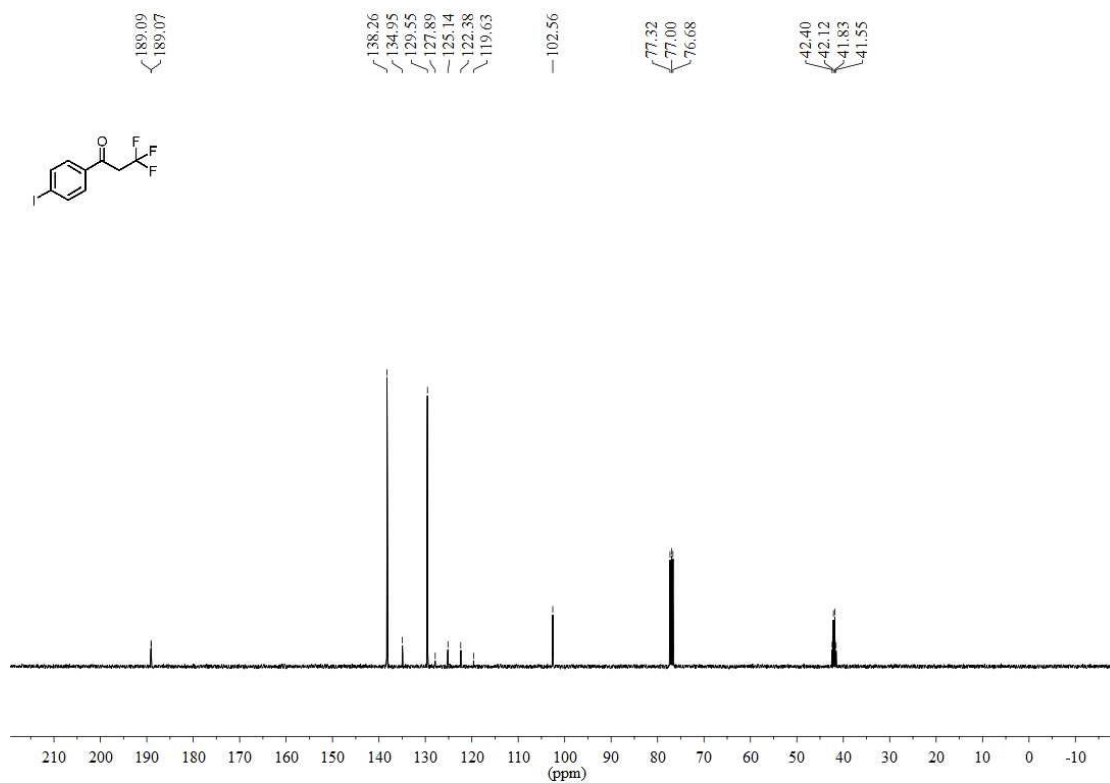

$^{19}\text{F}$  NMR (376 MHz,  $\text{CDCl}_3$ ) of compound **3j**

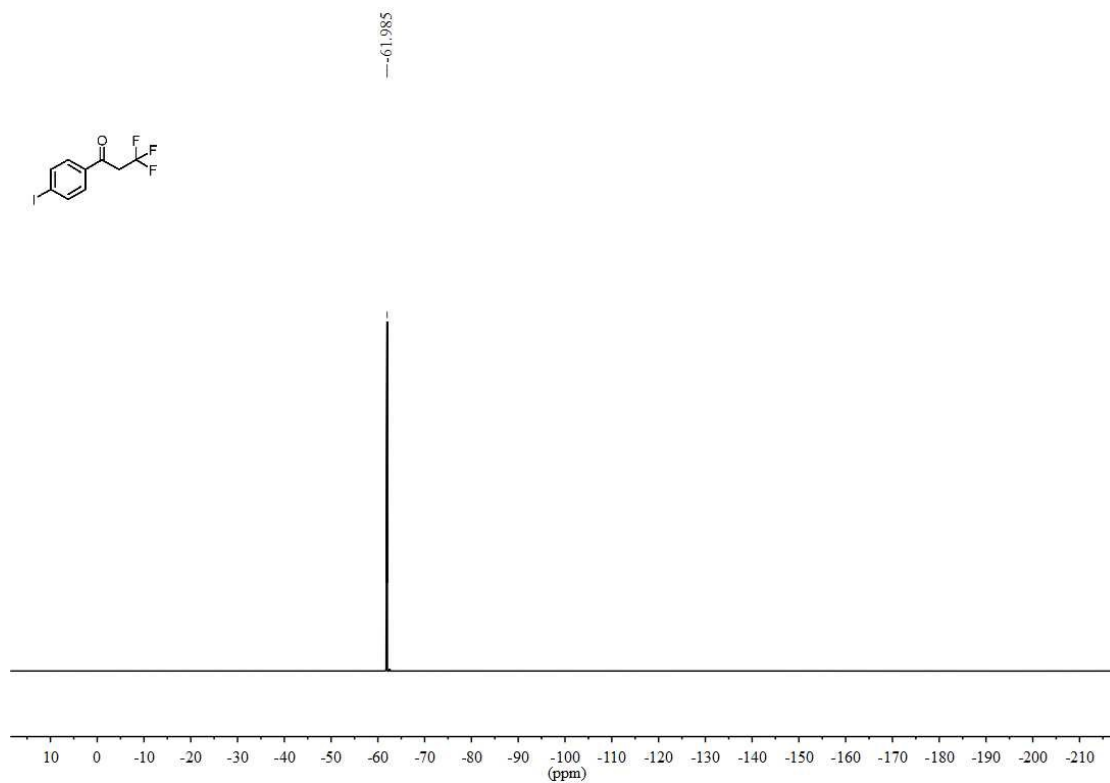

$^1\text{H}$  NMR (400 MHz,  $\text{CDCl}_3$ ) of compound **3k**

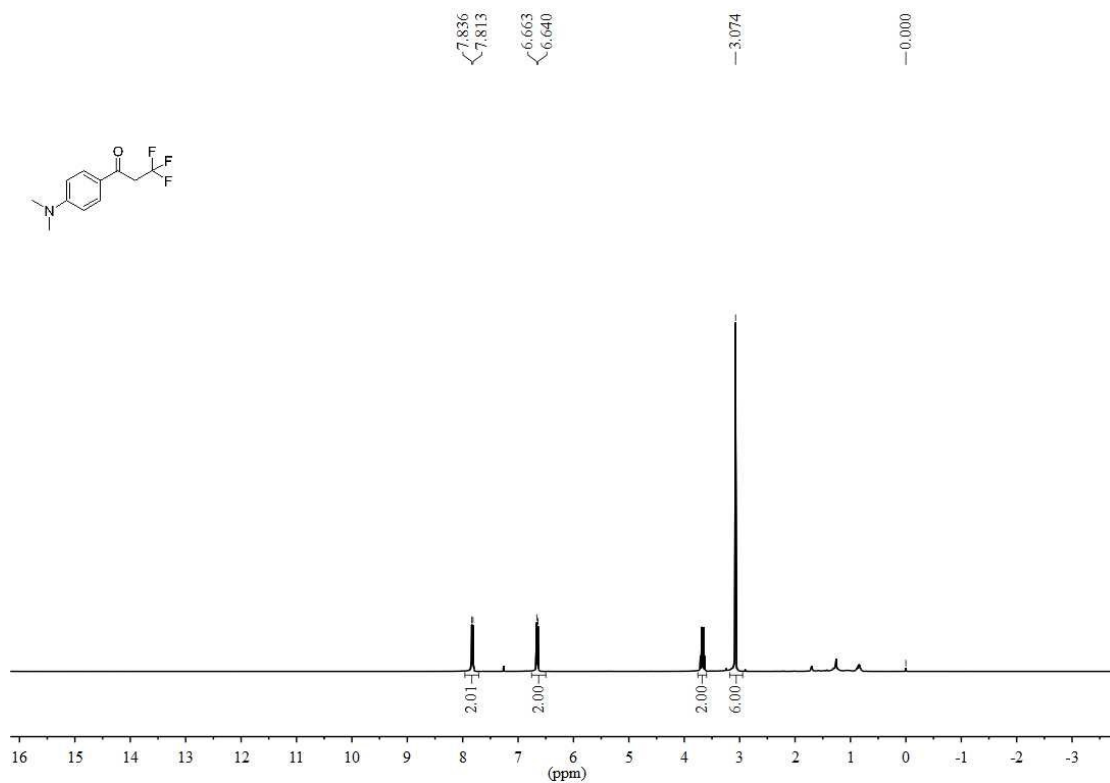

$^{13}\text{C}\{^1\text{H}\}$  NMR (100 MHz,  $\text{CDCl}_3$ ) of compound **3k**

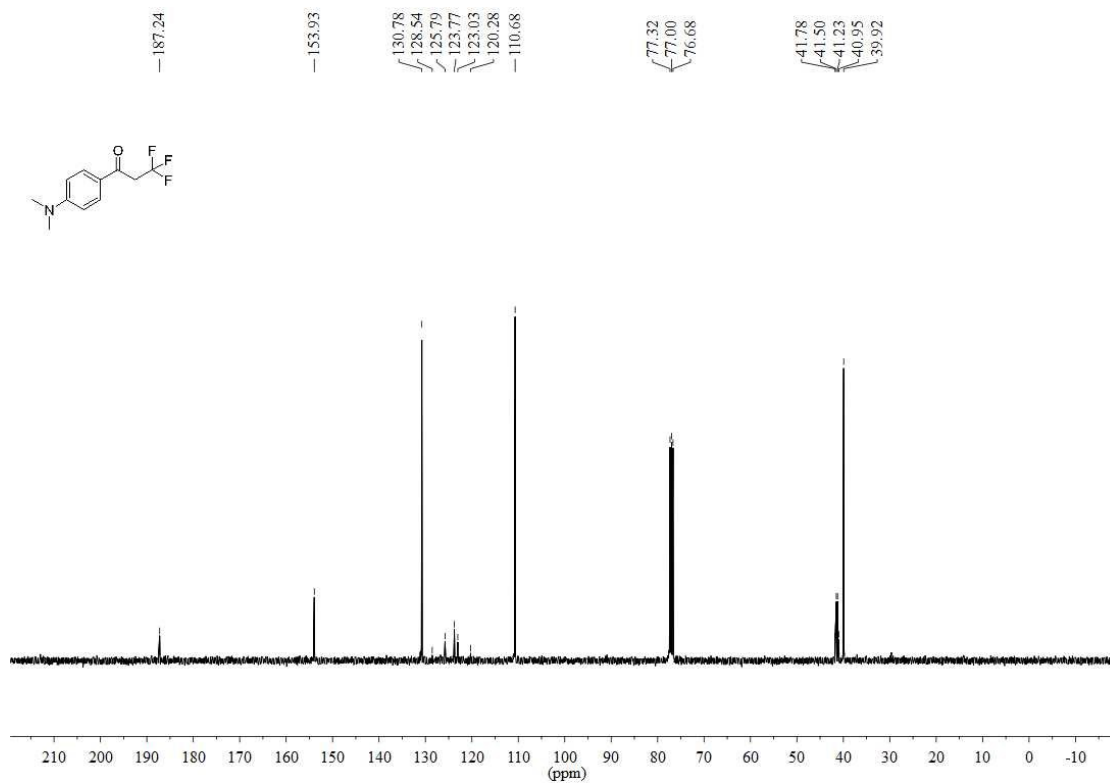

$^{19}\text{F}$  NMR (376 MHz,  $\text{CDCl}_3$ ) of compound **3k**

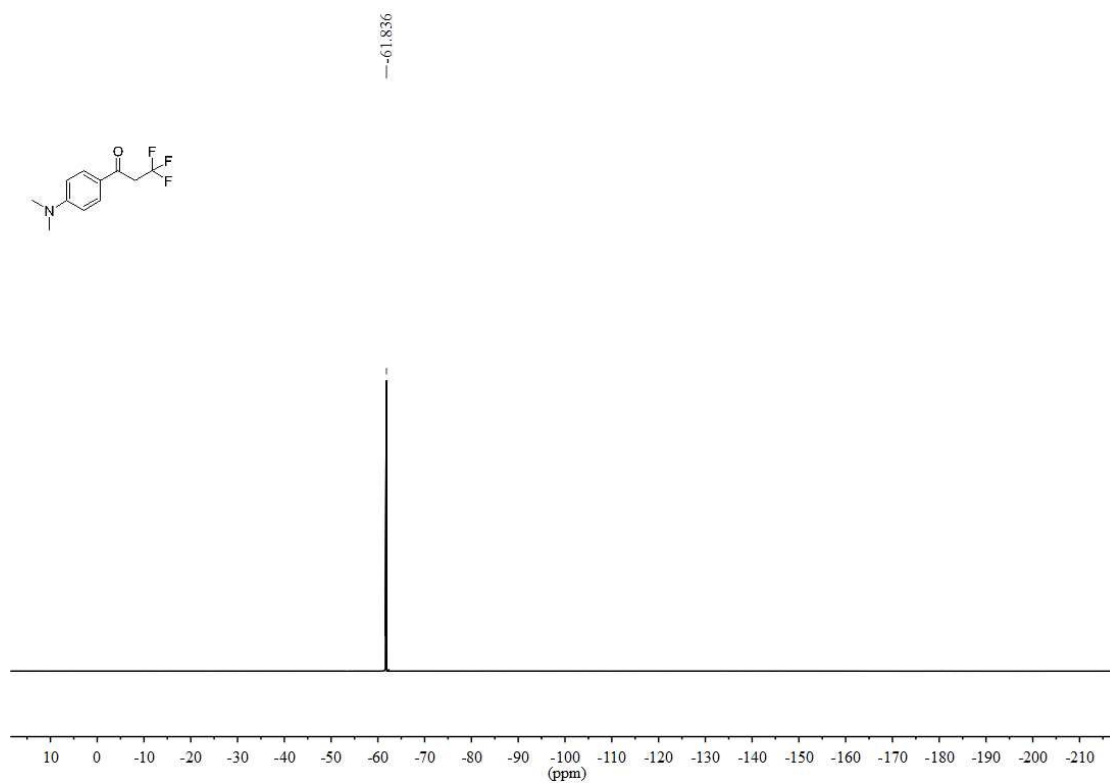

$^1\text{H}$  NMR (400 MHz,  $\text{CDCl}_3$ ) of compound **31**

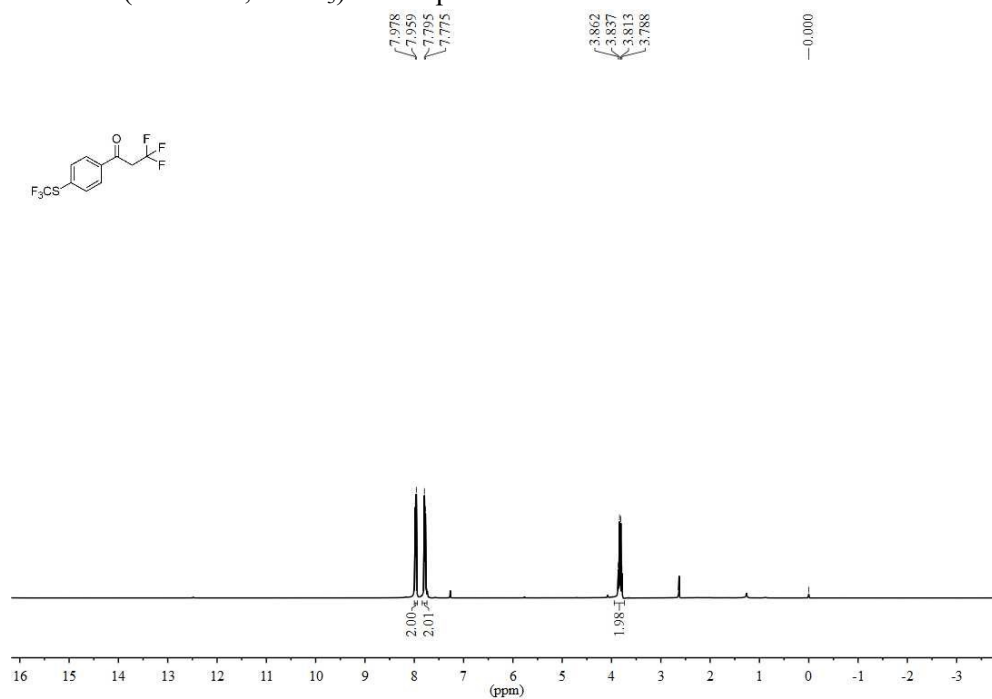

$^{13}\text{C}\{^1\text{H}\}$  NMR (100 MHz,  $\text{CDCl}_3$ ) of compound **31**

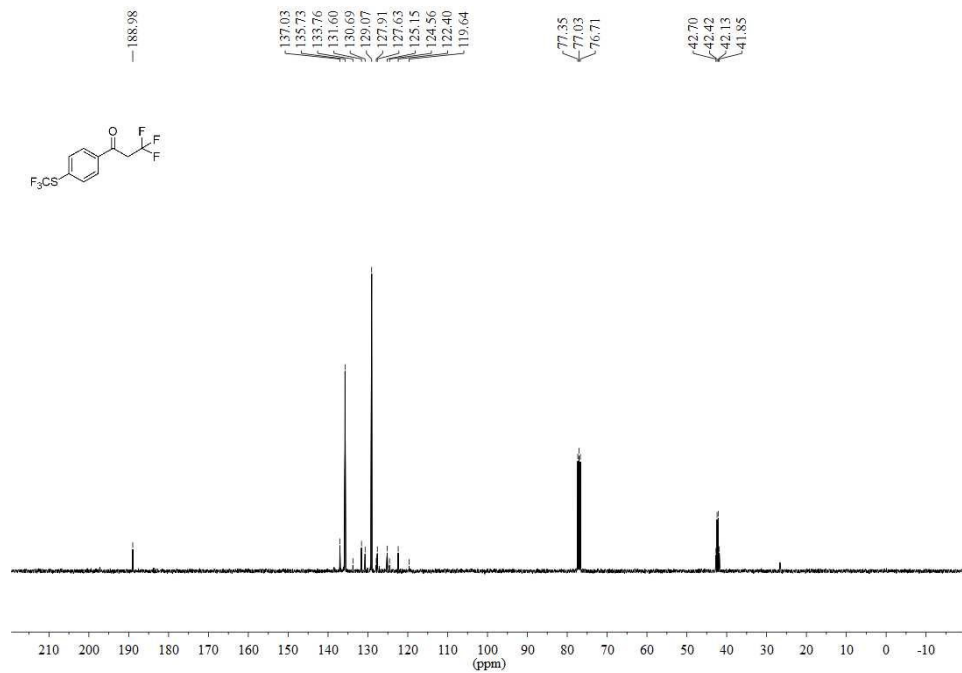

<sup>19</sup>F NMR (376 MHz, CDCl<sub>3</sub>) of compound **3l**

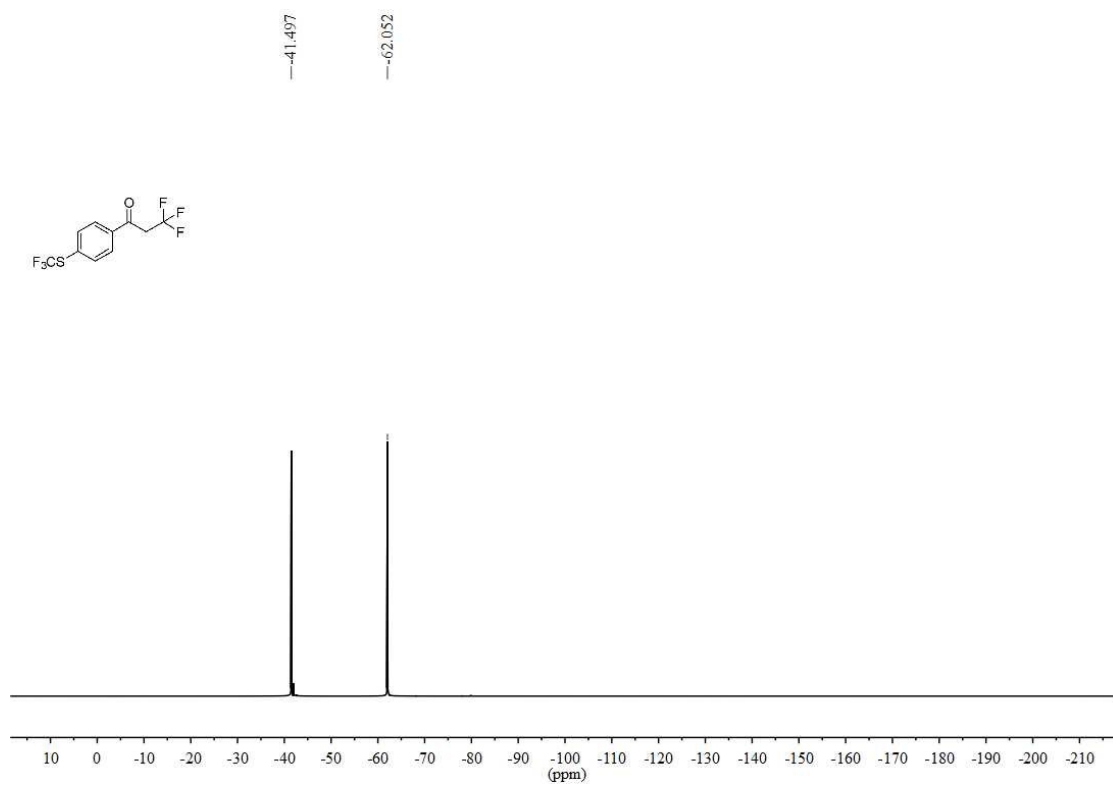

<sup>1</sup>H NMR (400 MHz, CDCl<sub>3</sub>) of compound **3m**

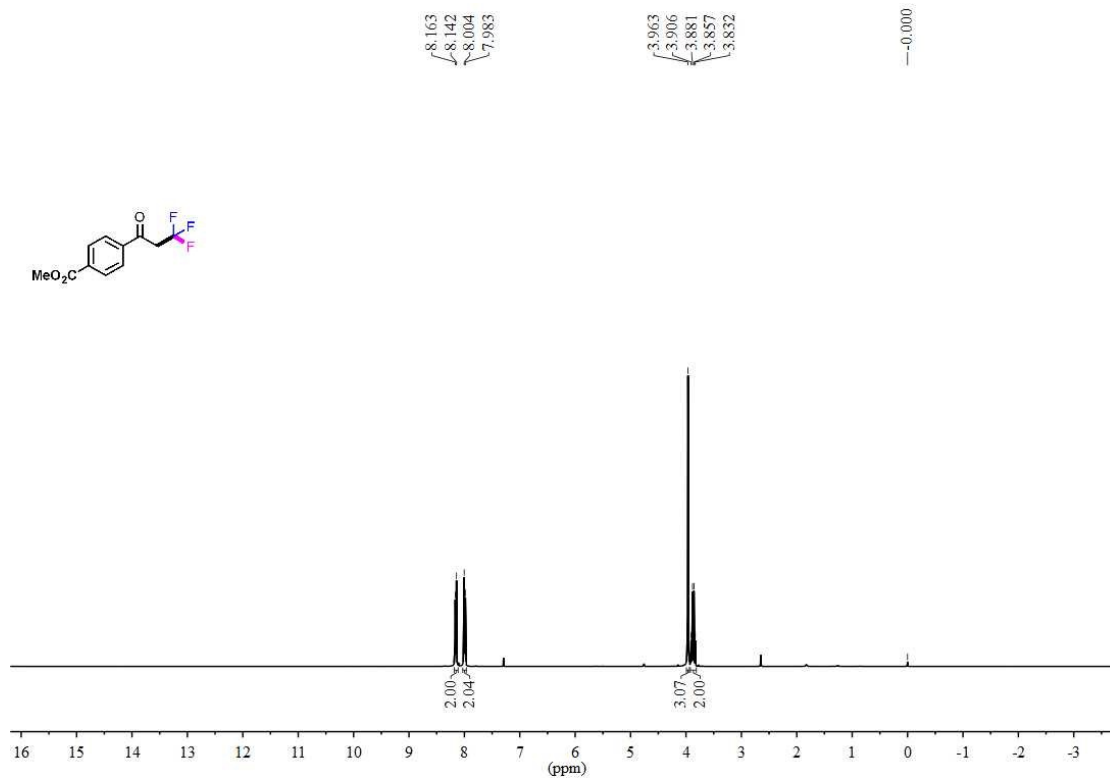

$^{13}\text{C}\{^1\text{H}\}$  NMR (100 MHz,  $\text{CDCl}_3$ ) of compound **3m**

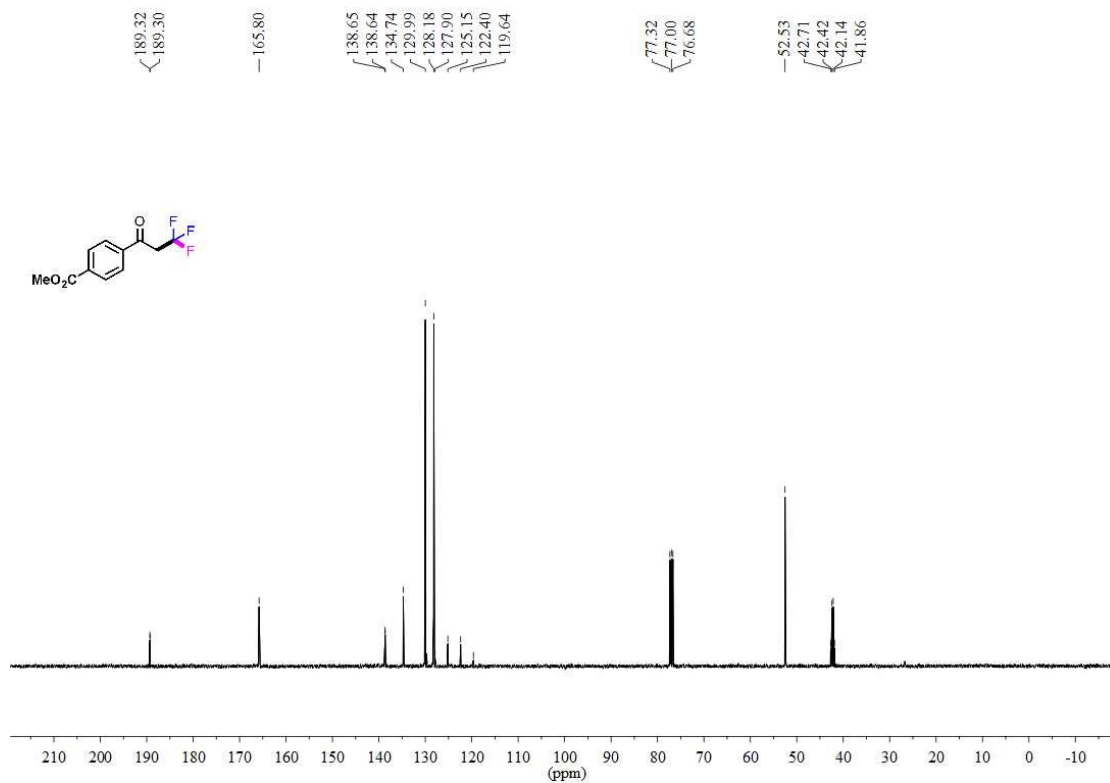

$^{19}\text{F}$  NMR (376 MHz,  $\text{CDCl}_3$ ) of compound **3m**

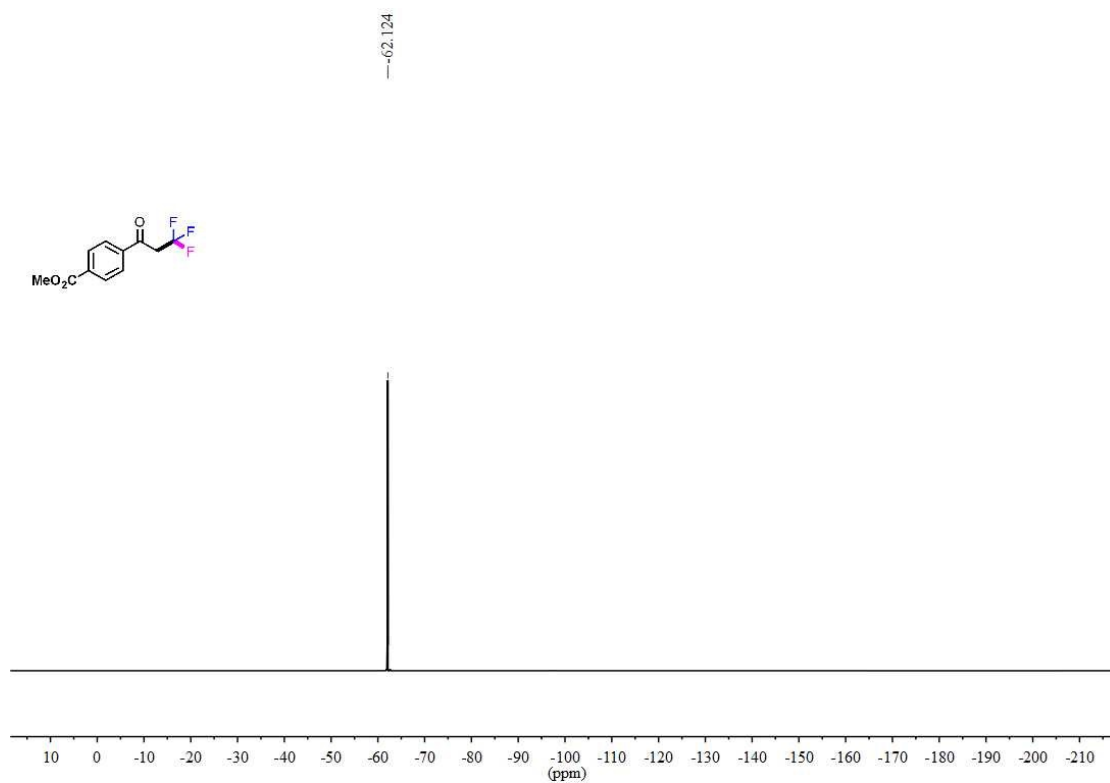

$^1\text{H}$  NMR (400 MHz,  $\text{CDCl}_3$ ) of compound **3n**

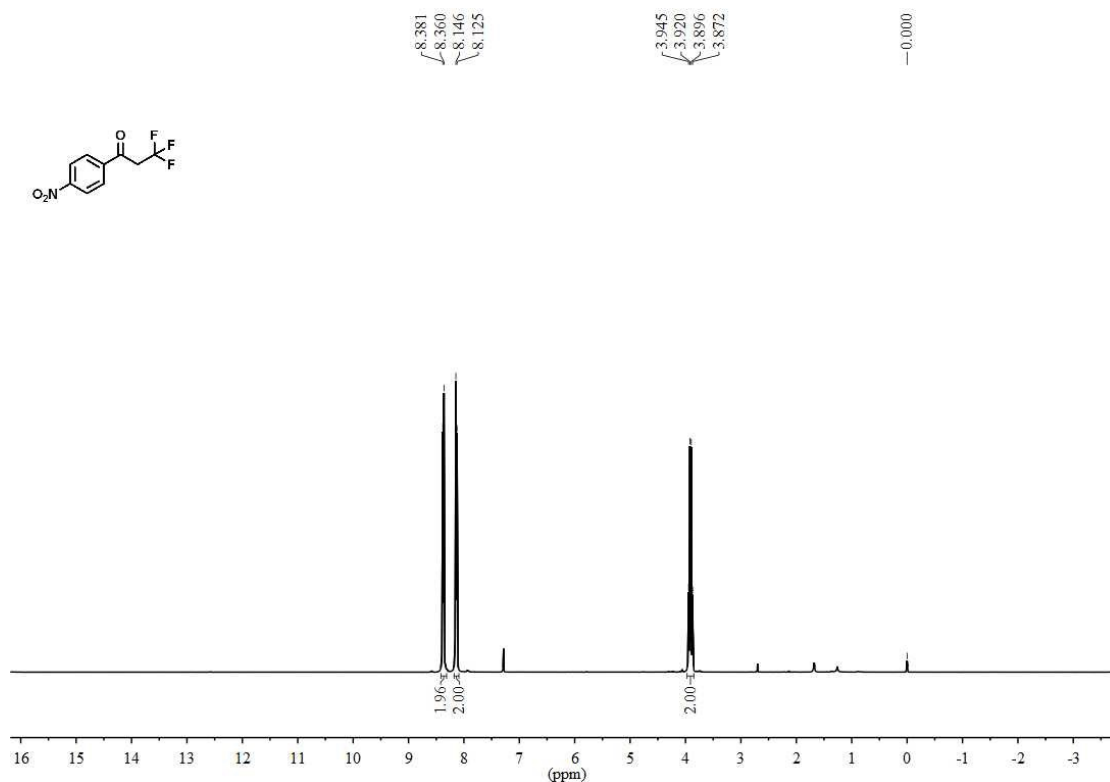

$^{13}\text{C}\{^1\text{H}\}$  NMR (100 MHz,  $\text{CDCl}_3$ ) of compound **3n**

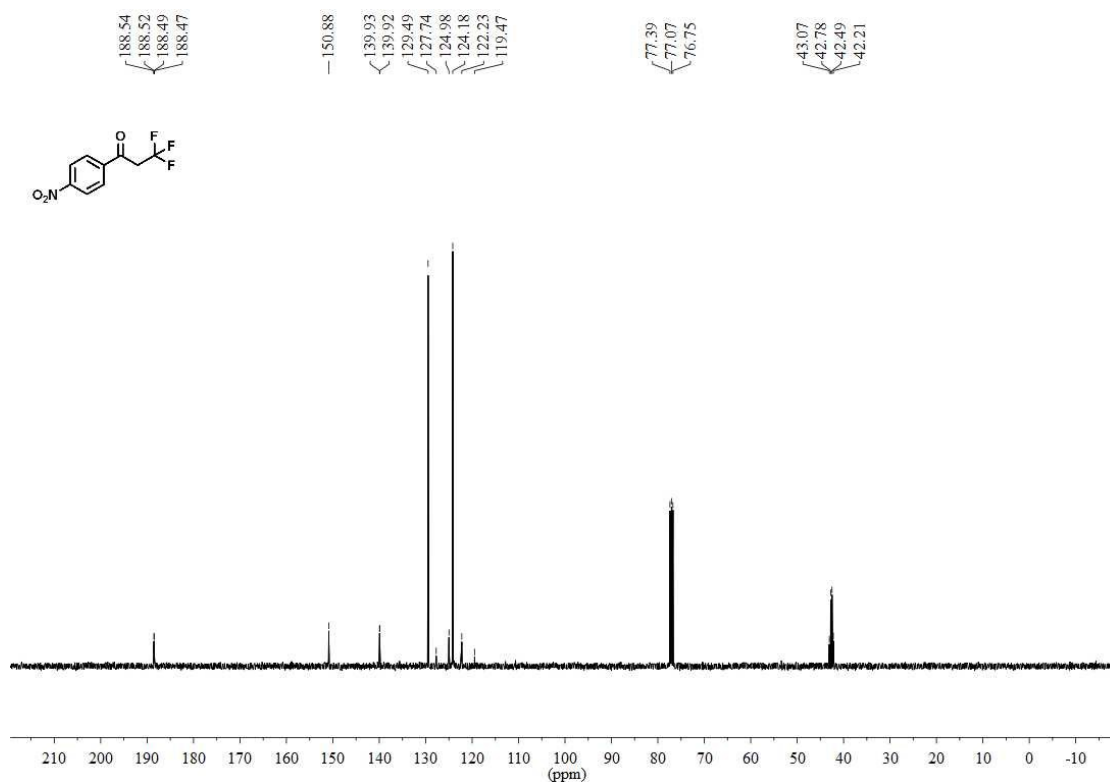

$^{19}\text{F}$  NMR (376 MHz,  $\text{CDCl}_3$ ) of compound **3n**

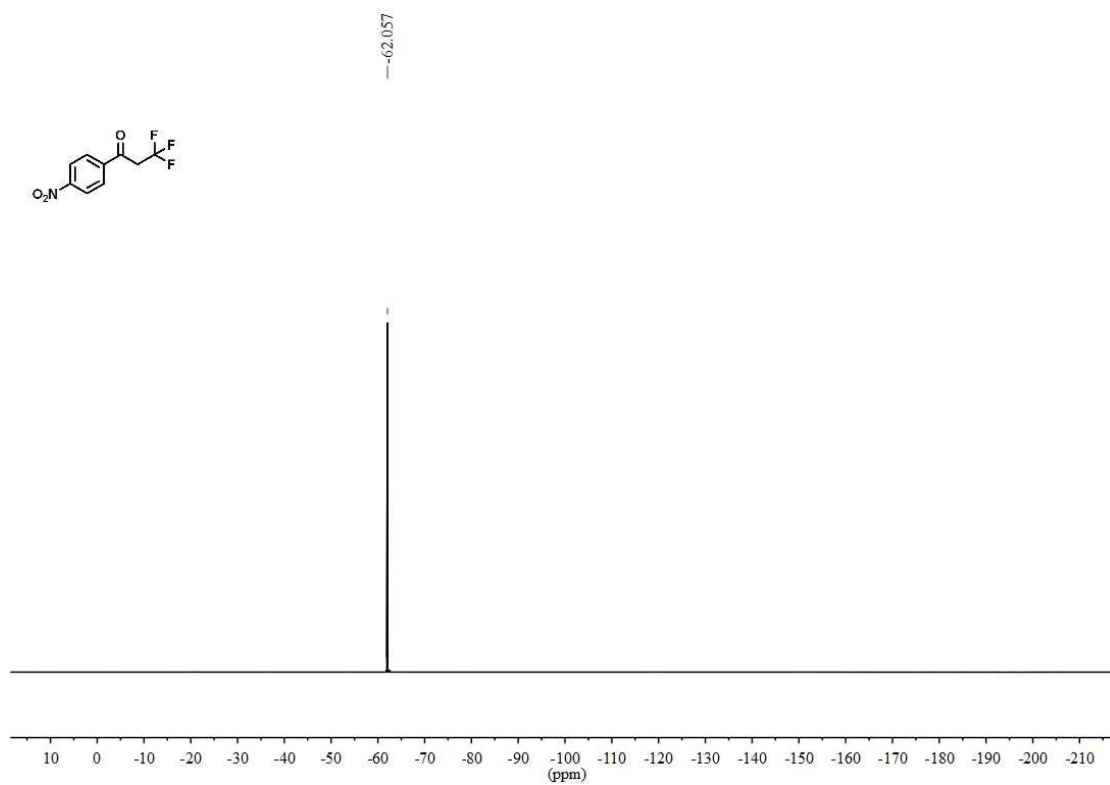

$^1\text{H}$  NMR (400 MHz,  $\text{CDCl}_3$ ) of compound **3o**

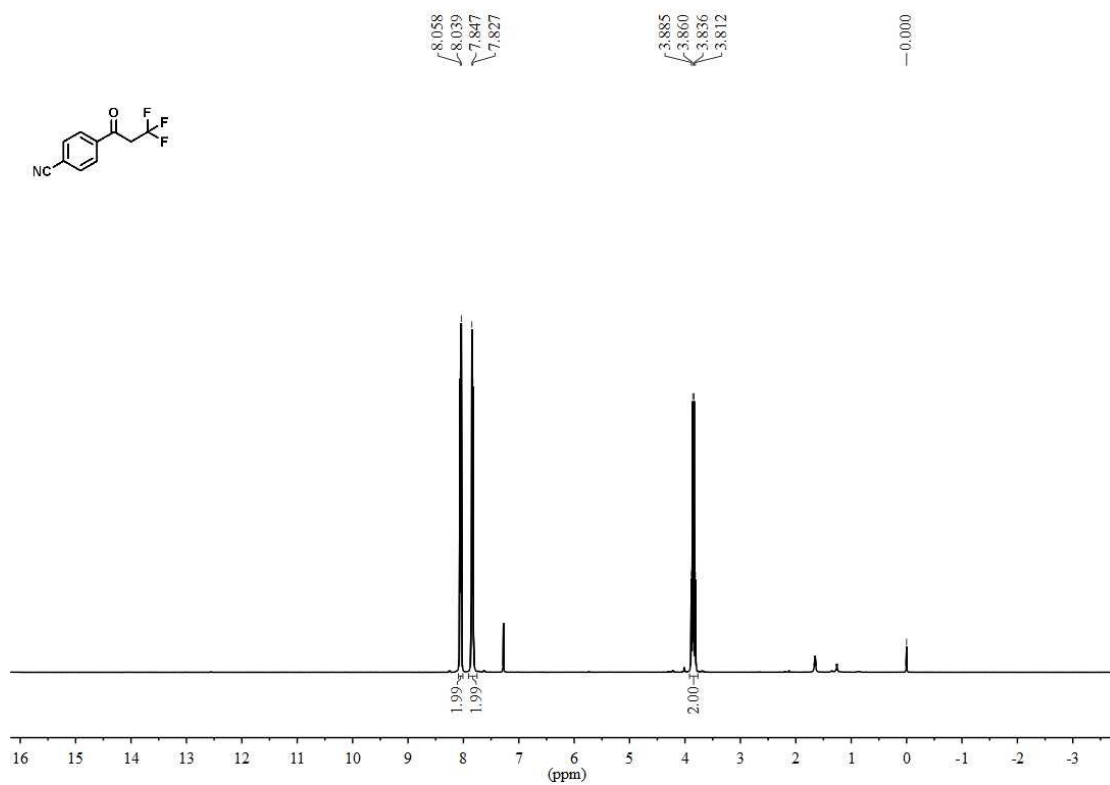

$^{13}\text{C}\{^1\text{H}\}$  NMR (100 MHz,  $\text{CDCl}_3$ ) of compound **3o**

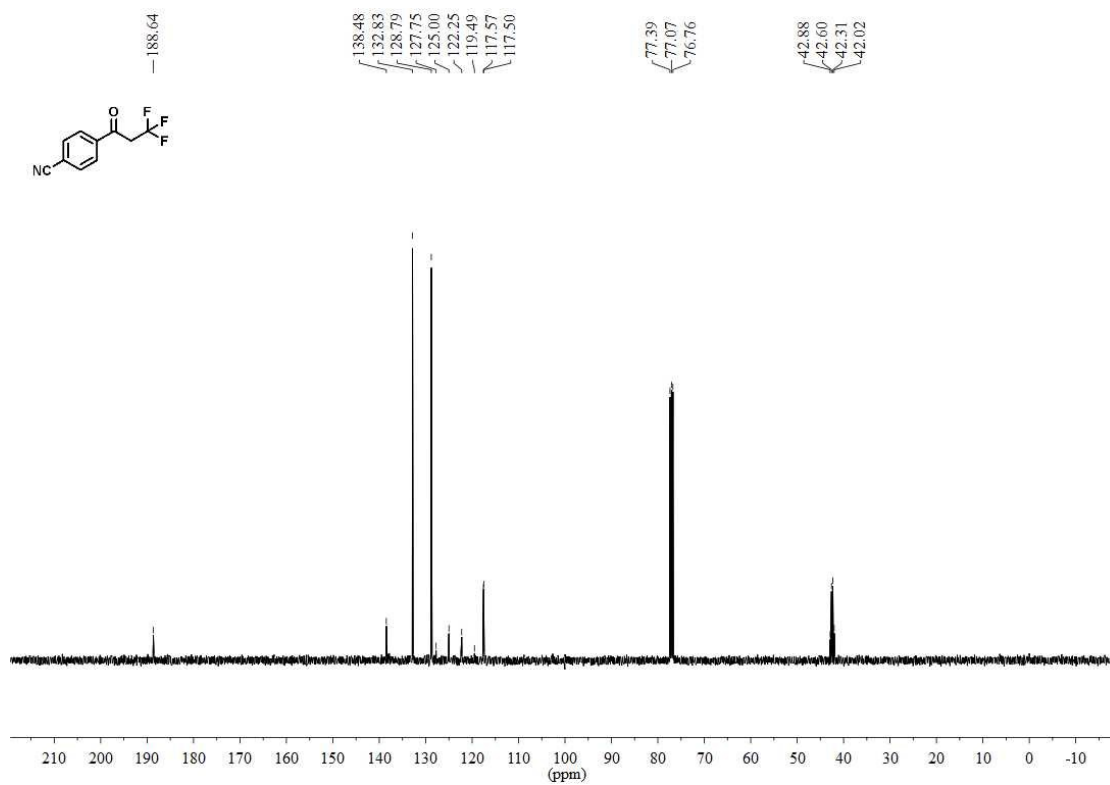

$^{19}\text{F}$  NMR (376 MHz,  $\text{CDCl}_3$ ) of compound **3o**



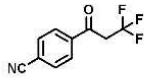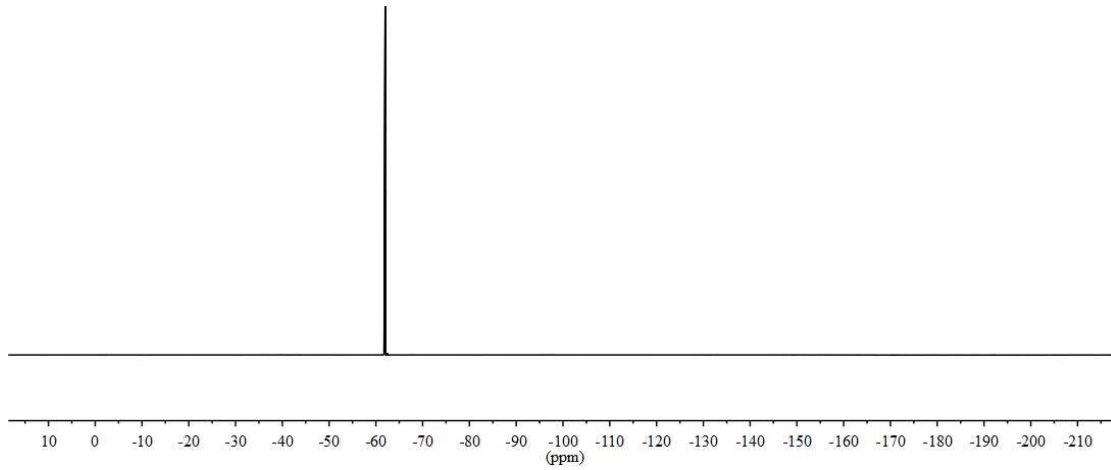

$^1\text{H}$  NMR (400 MHz,  $\text{CDCl}_3$ ) of compound **3p**

7.748, 7.733, 7.713, 7.458, 7.439, 7.412, 7.393, 7.374, 3.826, 3.801, 3.776, 3.751, -2.431, -0.000

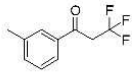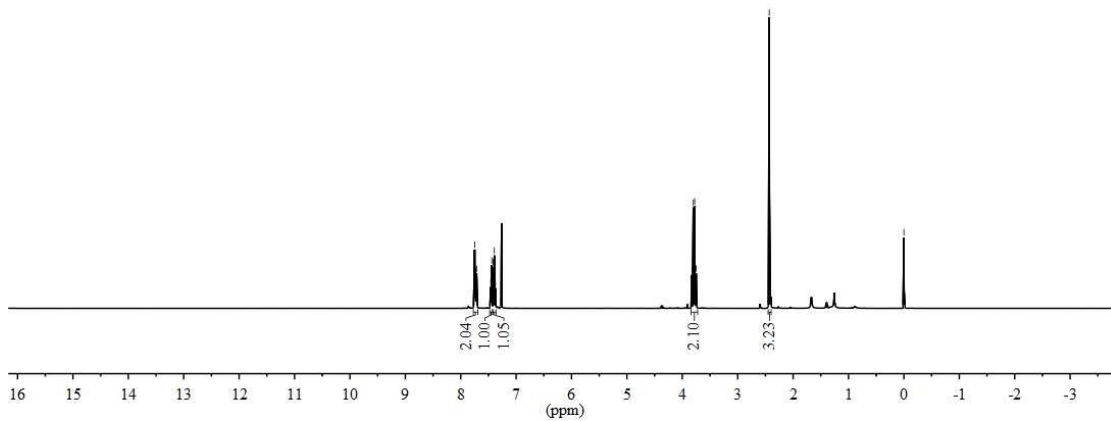

$^{13}\text{C}\{^1\text{H}\}$  NMR (100 MHz,  $\text{CDCl}_3$ ) of compound **3p**

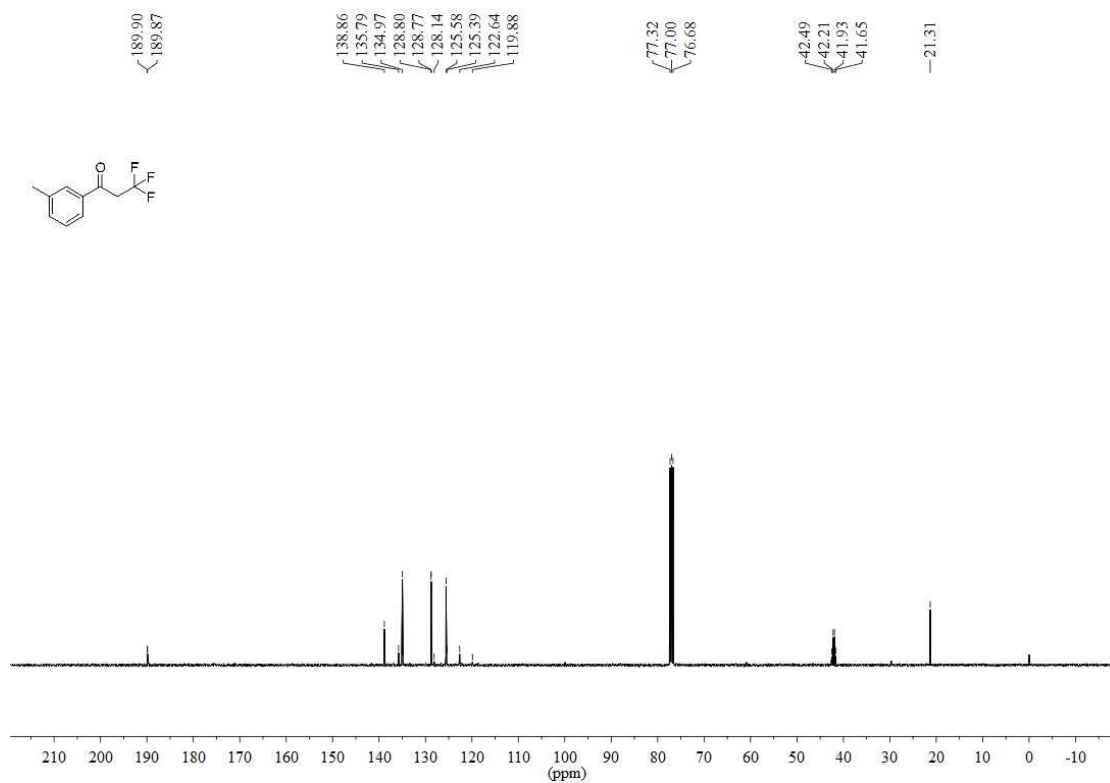

$^{19}\text{F}$  NMR (376 MHz,  $\text{CDCl}_3$ ) of compound **3p**

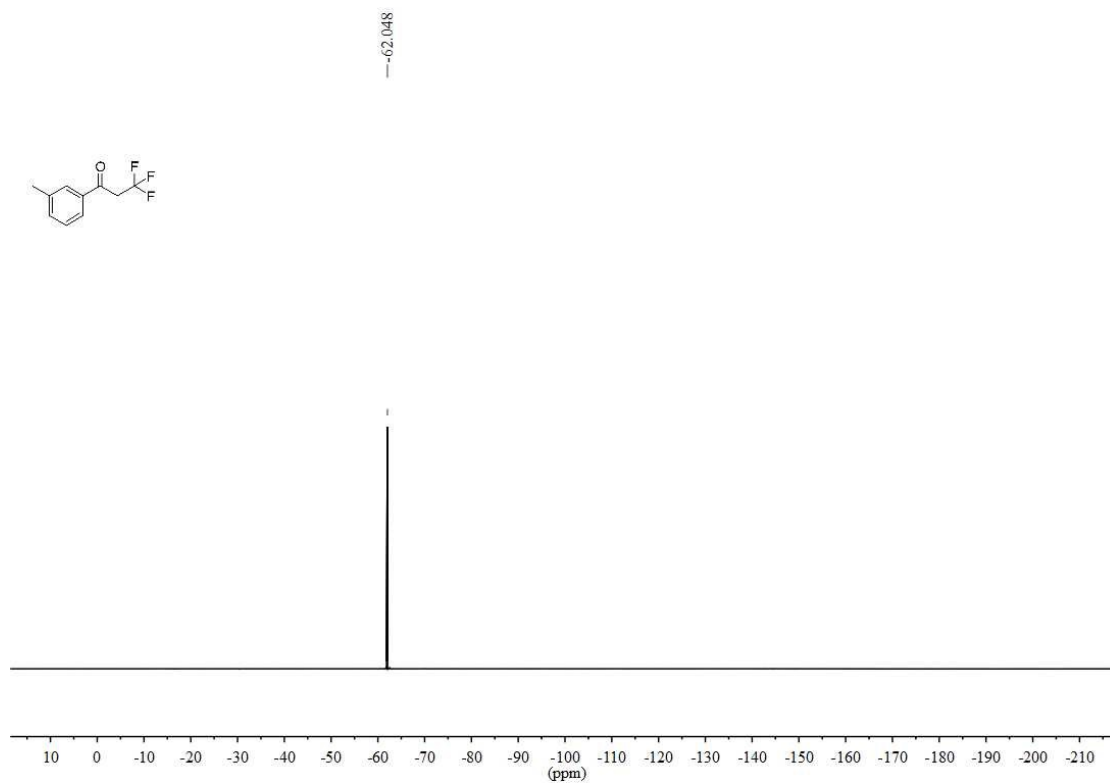

$^{13}\text{C}$  NMR (100 MHz,  $\text{CDCl}_3$ ) of compound **3p**

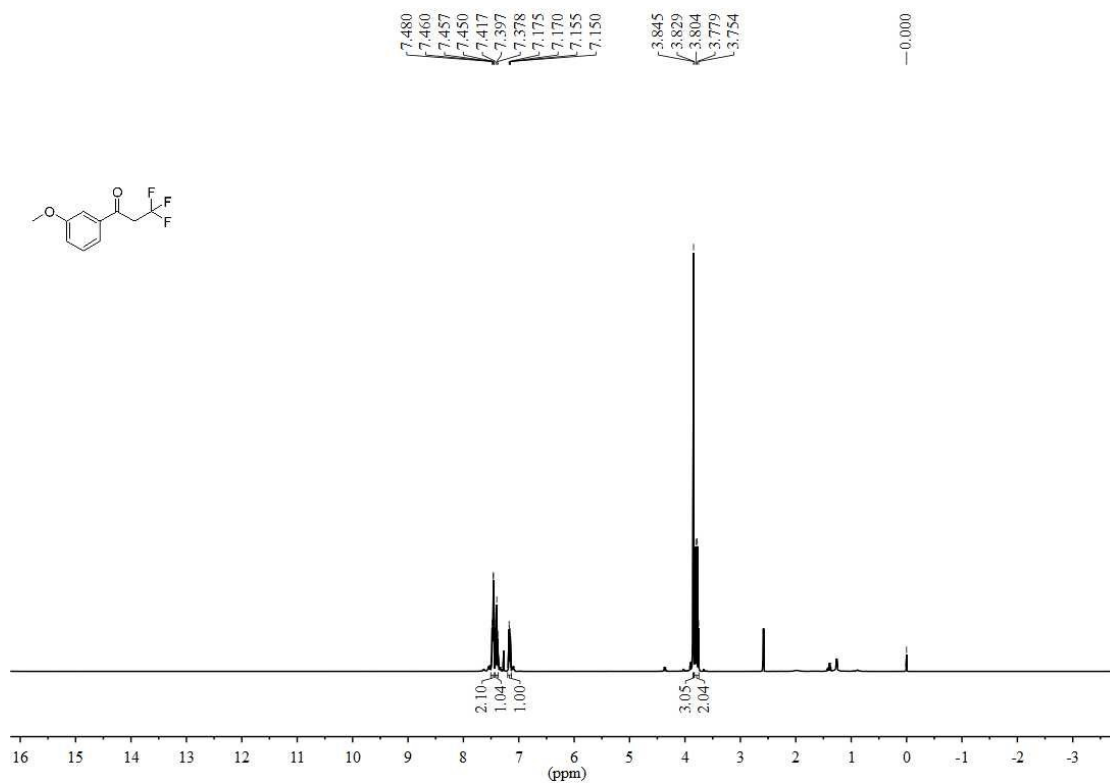

$^{13}\text{C}\{^1\text{H}\}$  NMR (100 MHz,  $\text{CDCl}_3$ ) of compound **3q**

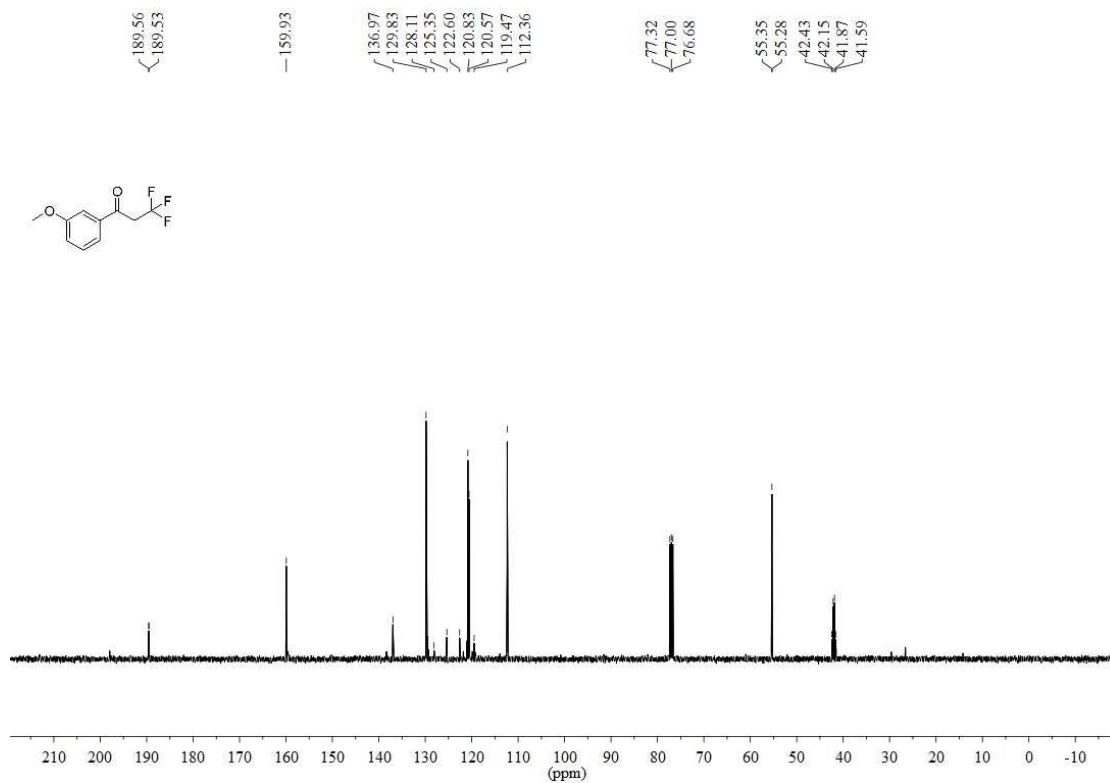

$^{19}\text{F}$  NMR (376 MHz,  $\text{CDCl}_3$ ) of compound **3q**

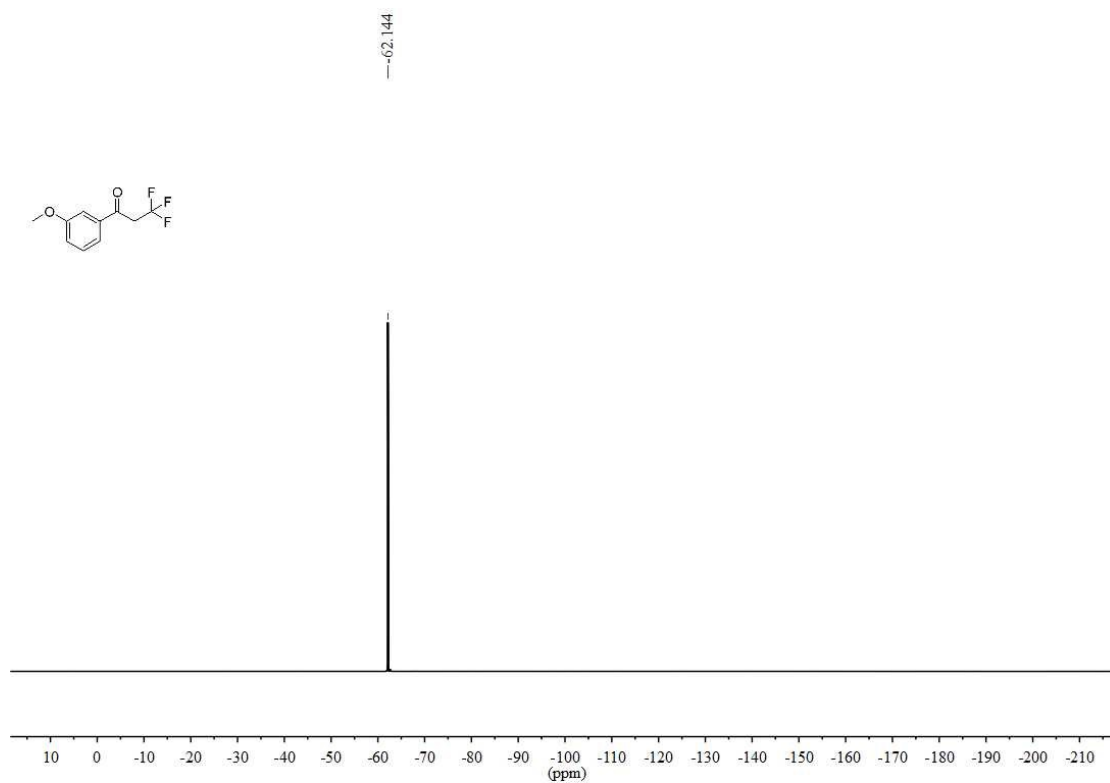

$^1\text{H}$  NMR (400 MHz,  $\text{CDCl}_3$ ) of compound **3r**

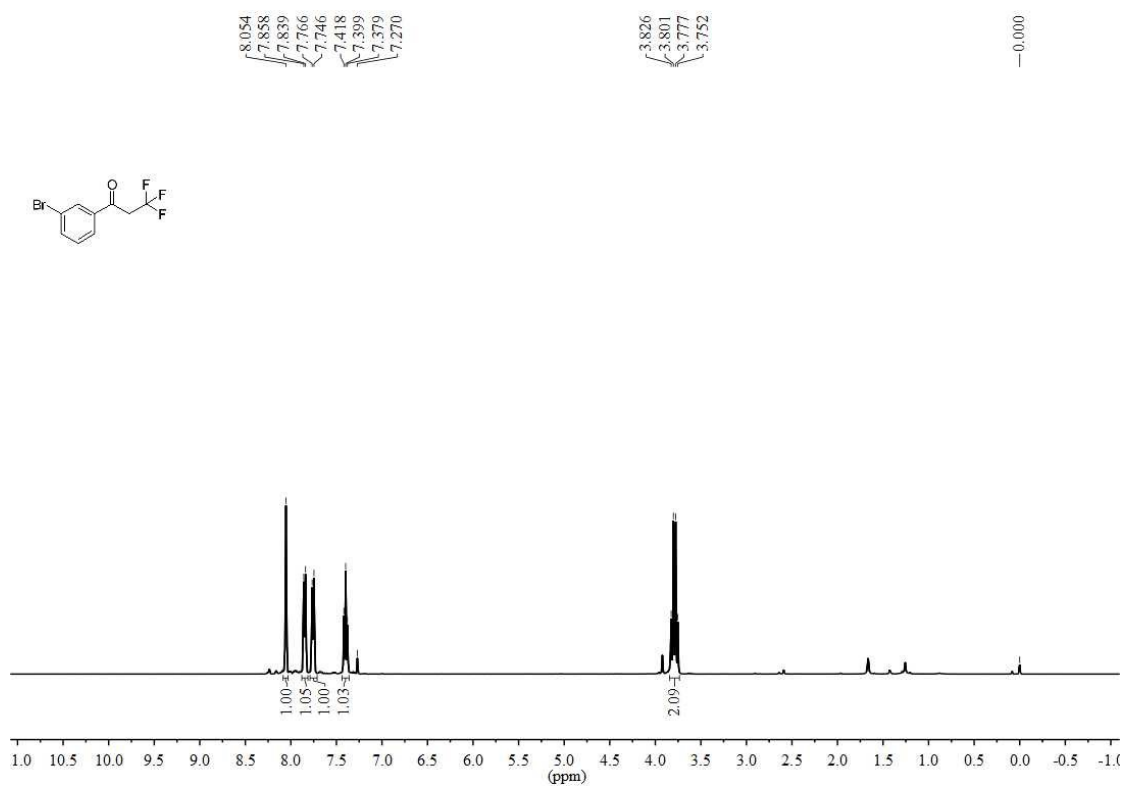

$^{13}\text{C}\{^1\text{H}\}$  NMR (100 MHz,  $\text{CDCl}_3$ ) of compound **3r**

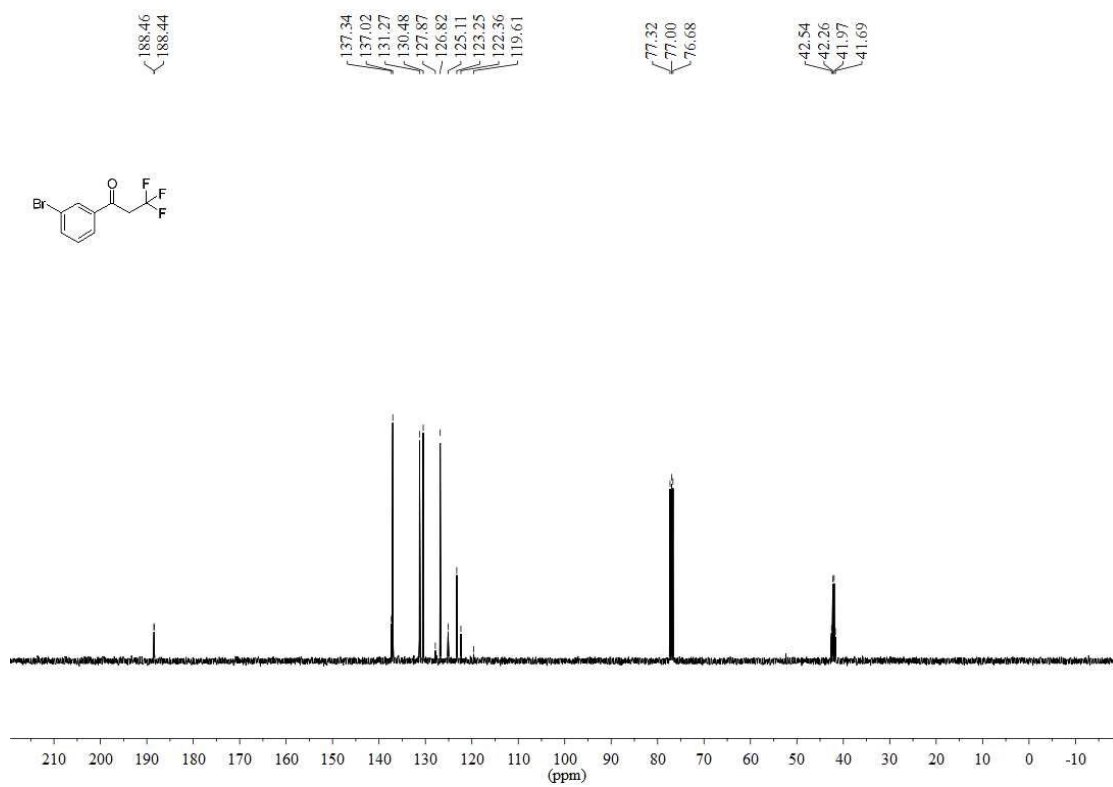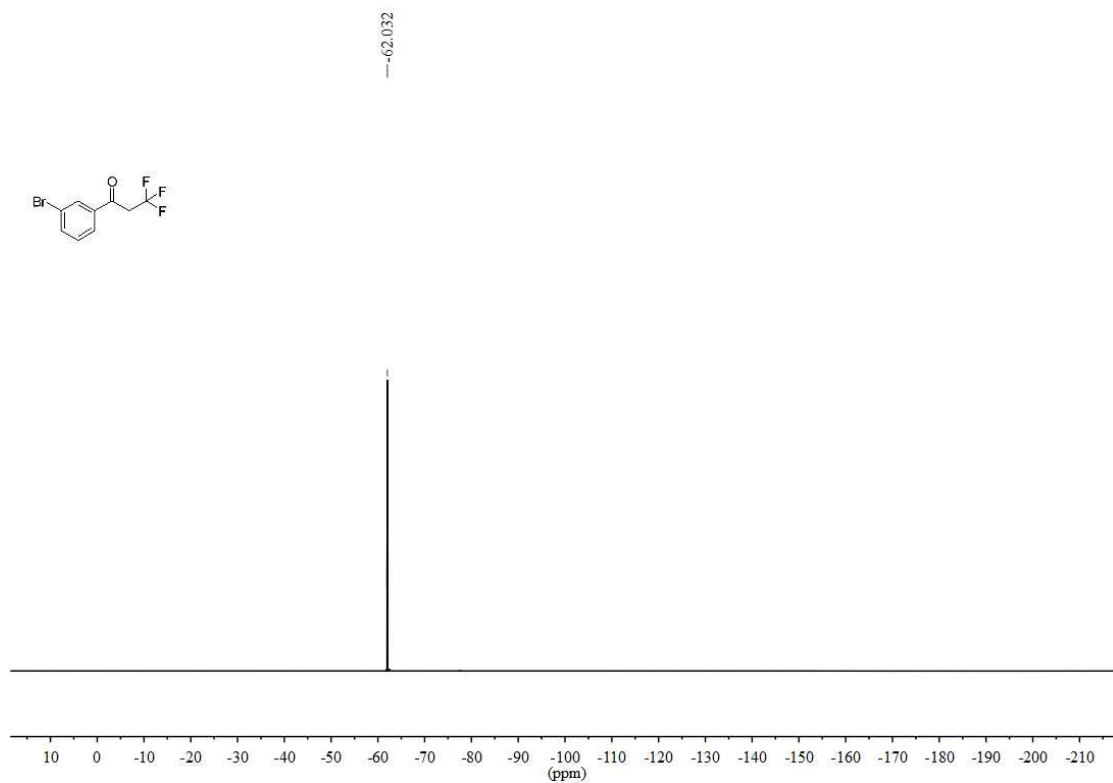

$^1\text{H}$  NMR (400 MHz,  $\text{CDCl}_3$ ) of compound **3s**

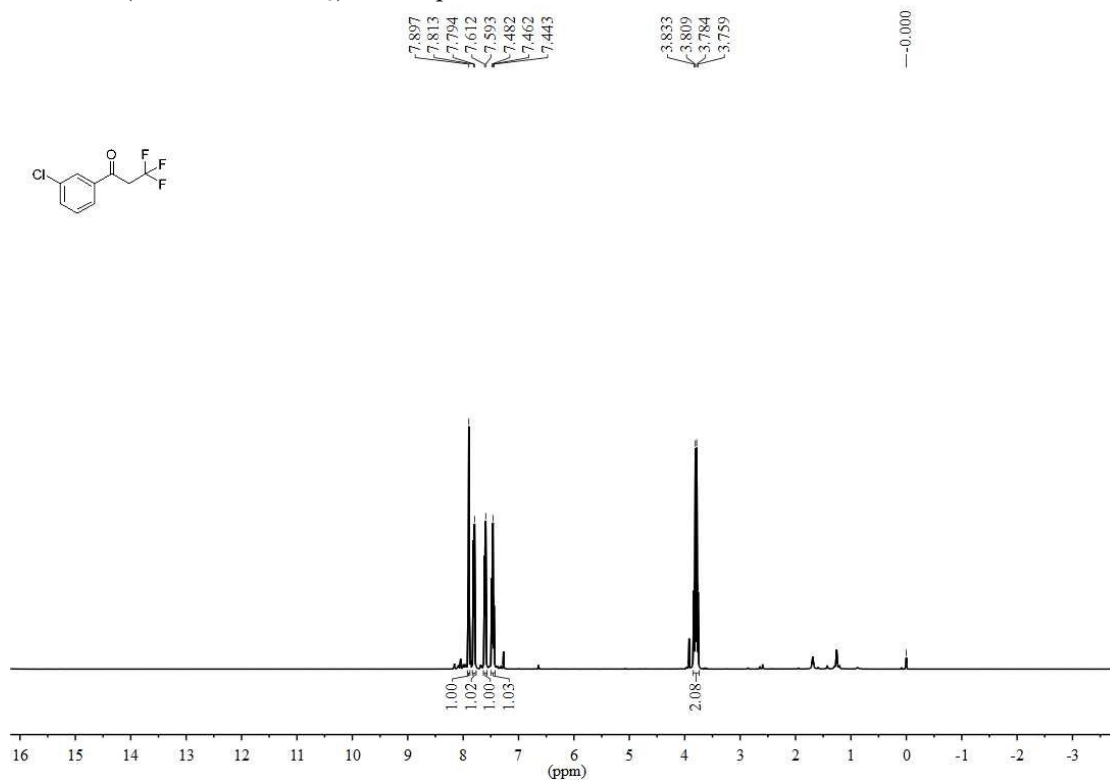

$^{13}\text{C}\{^1\text{H}\}$  NMR (100 MHz,  $\text{CDCl}_3$ ) of compound **3s**

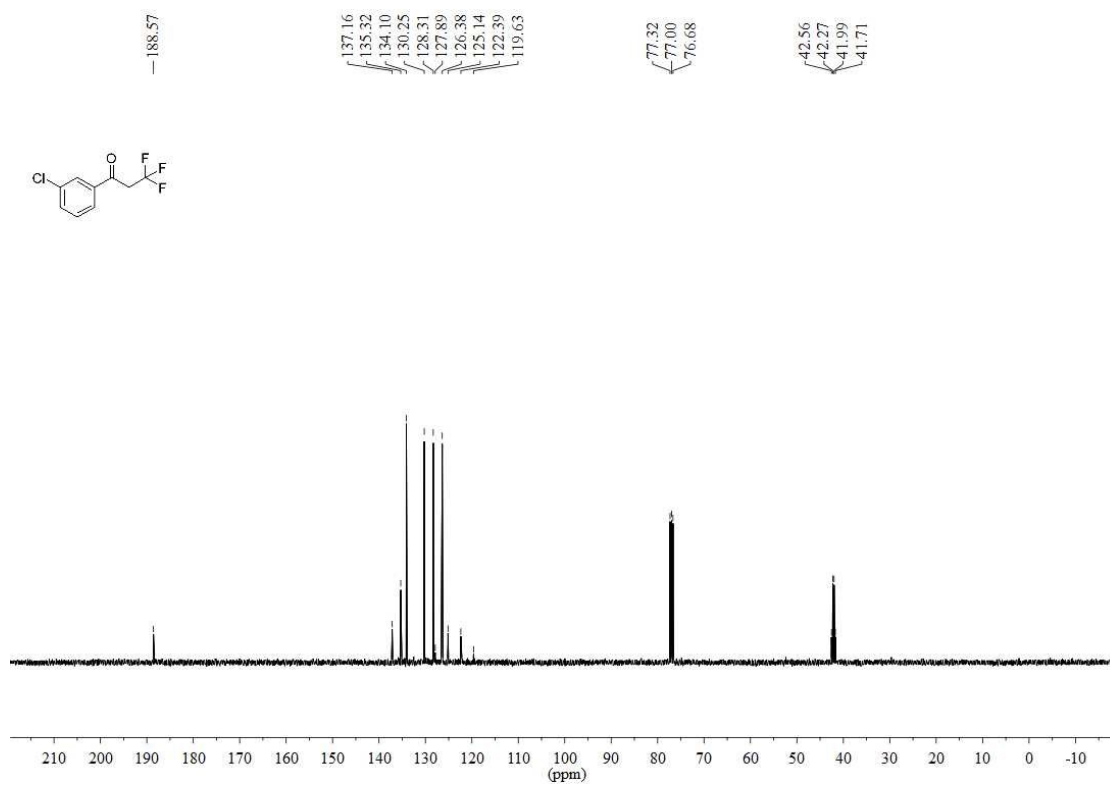

$^{19}\text{F}$  NMR (376 MHz,  $\text{CDCl}_3$ ) of compound **3s**

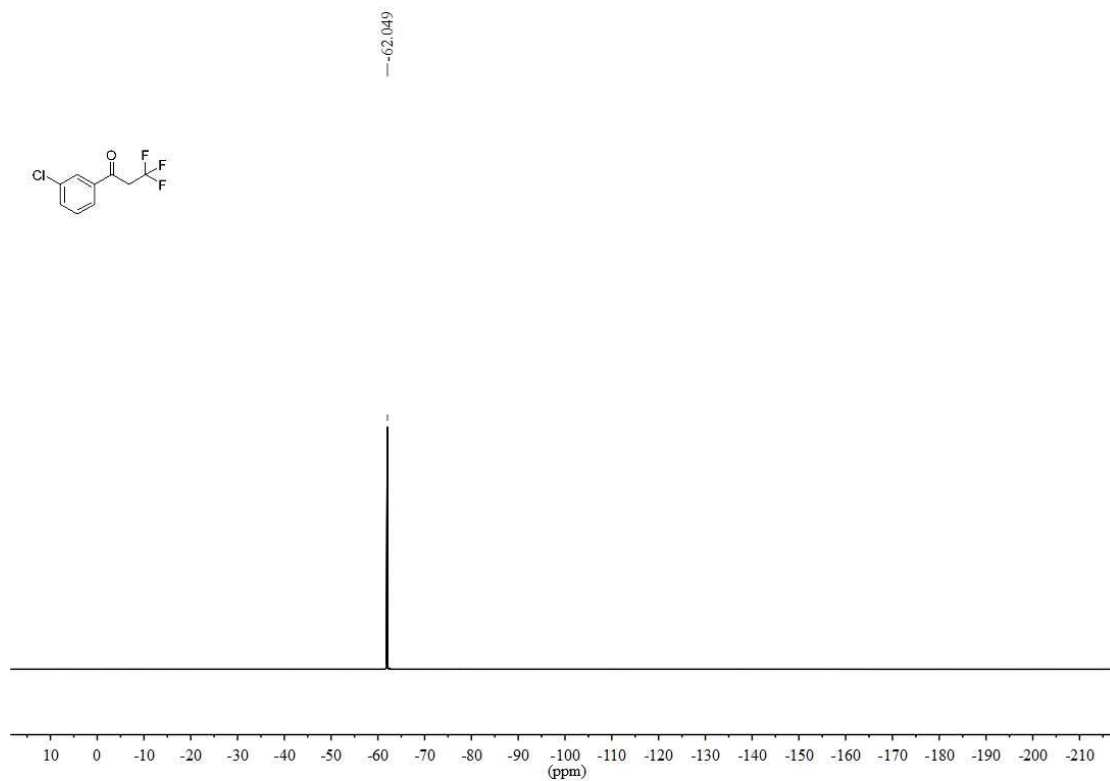

$^1\text{H}$  NMR (400 MHz,  $\text{CDCl}_3$ ) of compound **3t**

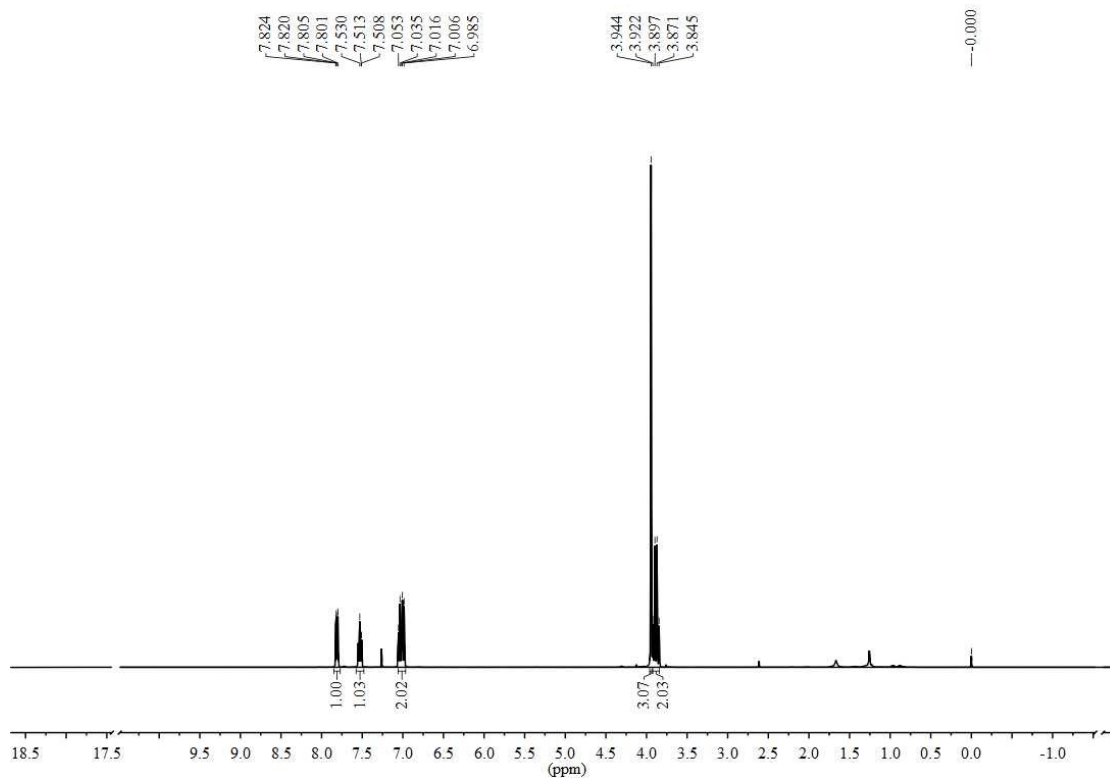

$^{13}\text{C}\{^1\text{H}\}$  NMR (100 MHz,  $\text{CDCl}_3$ ) of compound **3t**

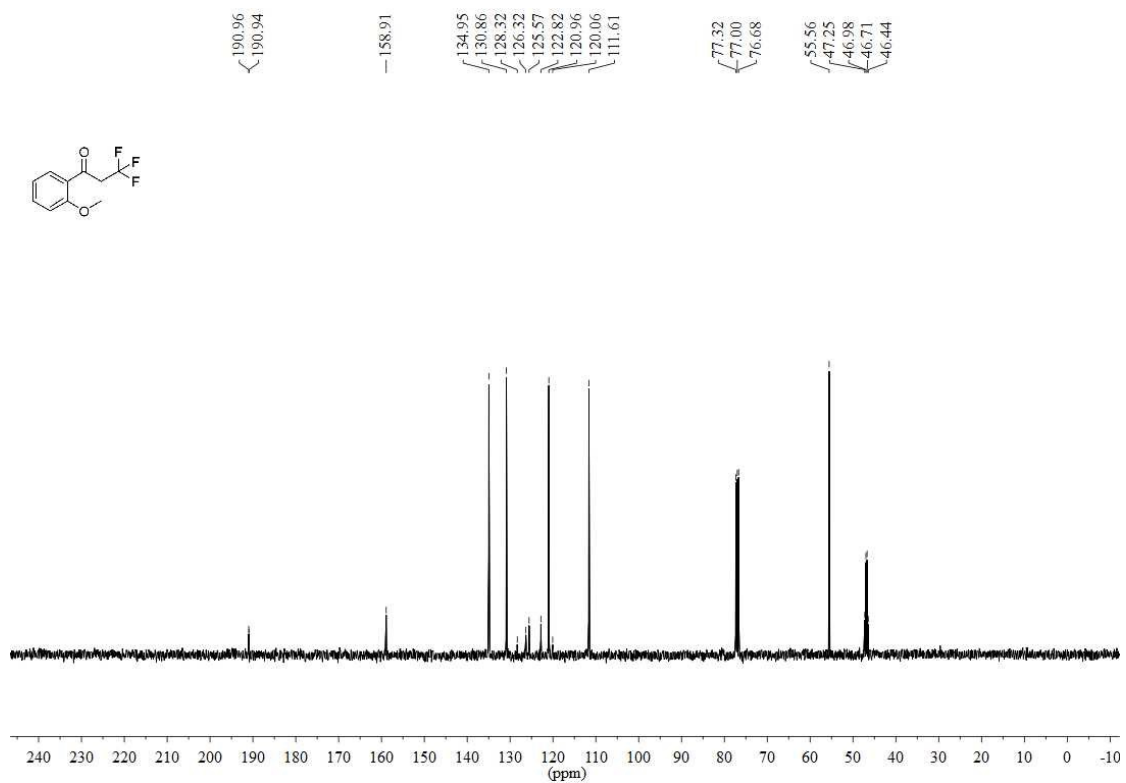

$^{19}\text{F}$  NMR (376 MHz,  $\text{CDCl}_3$ ) of compound **3t**

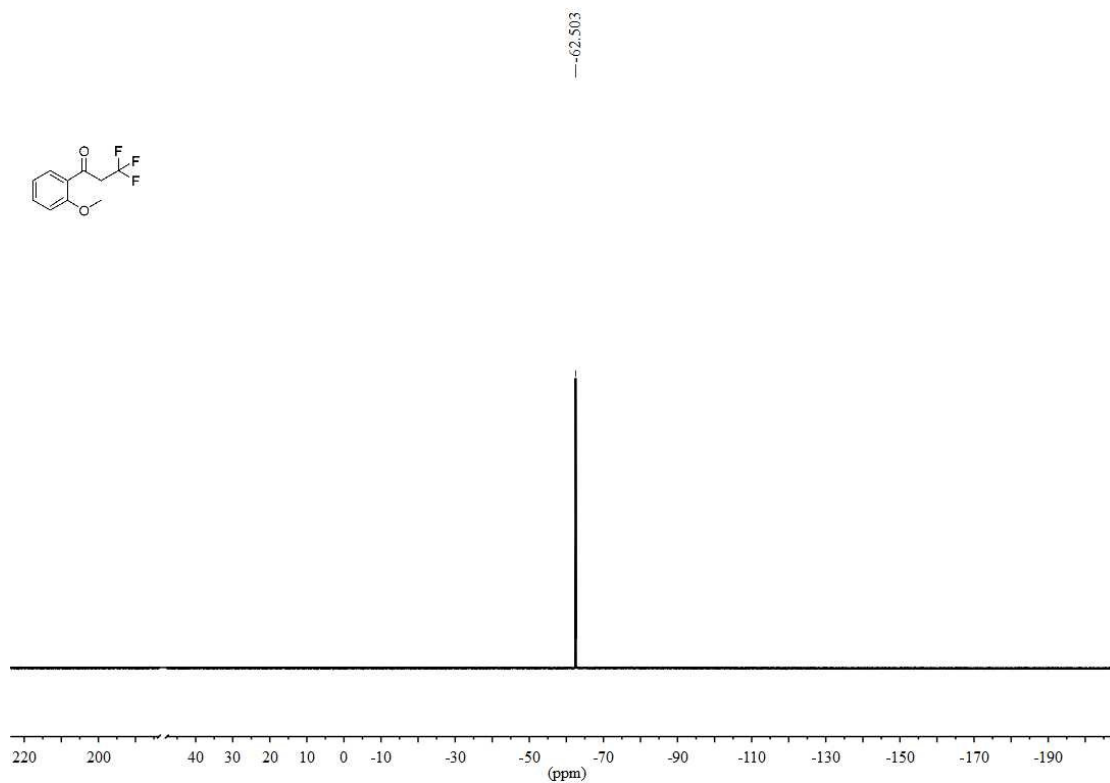

$^1\text{H}$  NMR (400 MHz,  $\text{CDCl}_3$ ) of compound **3u**



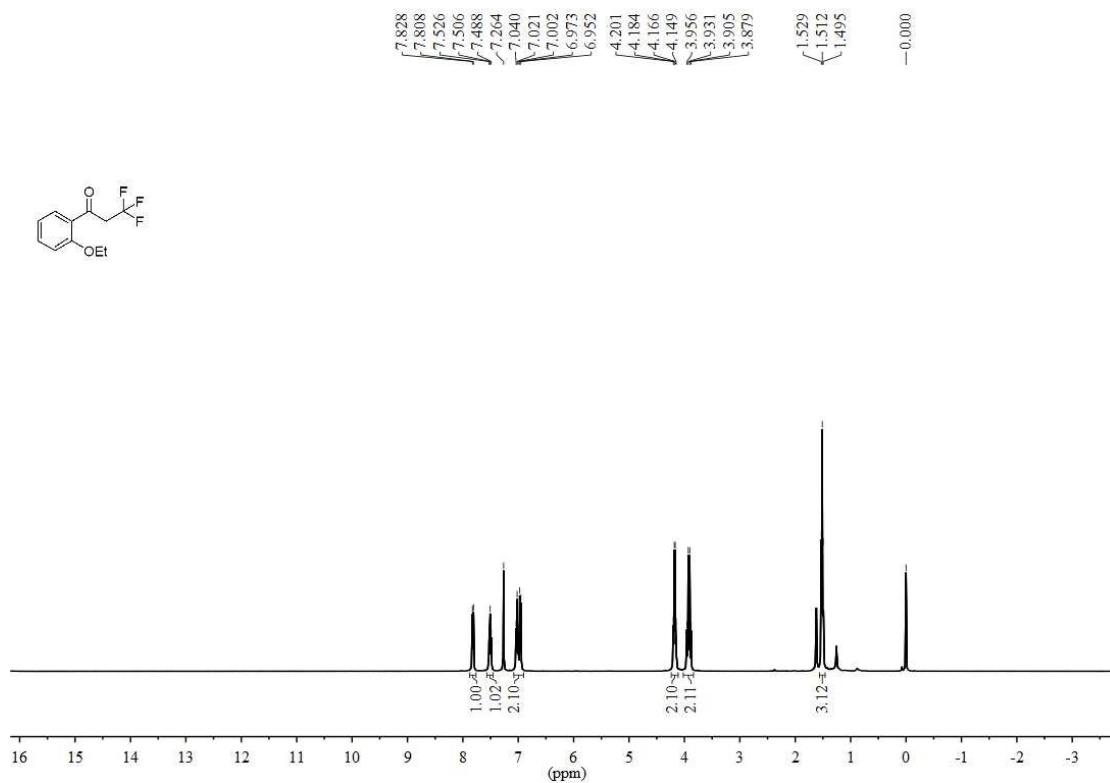

$^{13}\text{C}\{^1\text{H}\}$  NMR (100 MHz,  $\text{CDCl}_3$ ) of compound **3u**

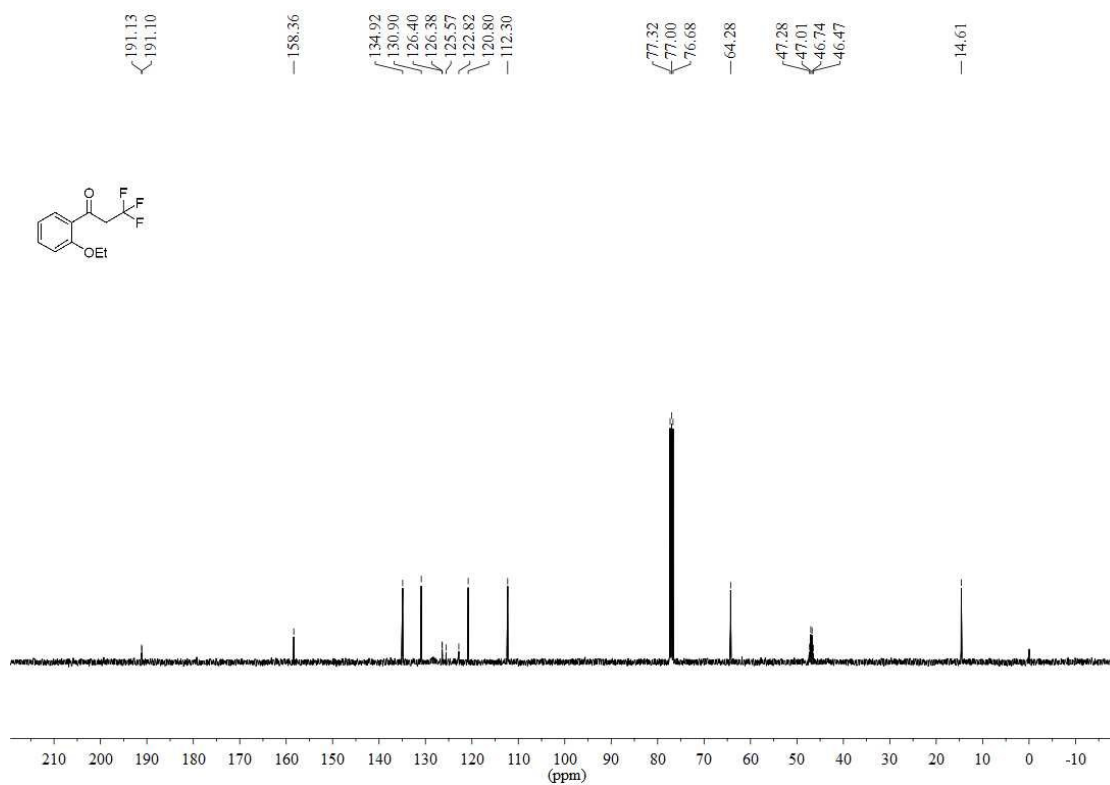

$^{19}\text{F}$  NMR (376 MHz,  $\text{CDCl}_3$ ) of compound **3u**

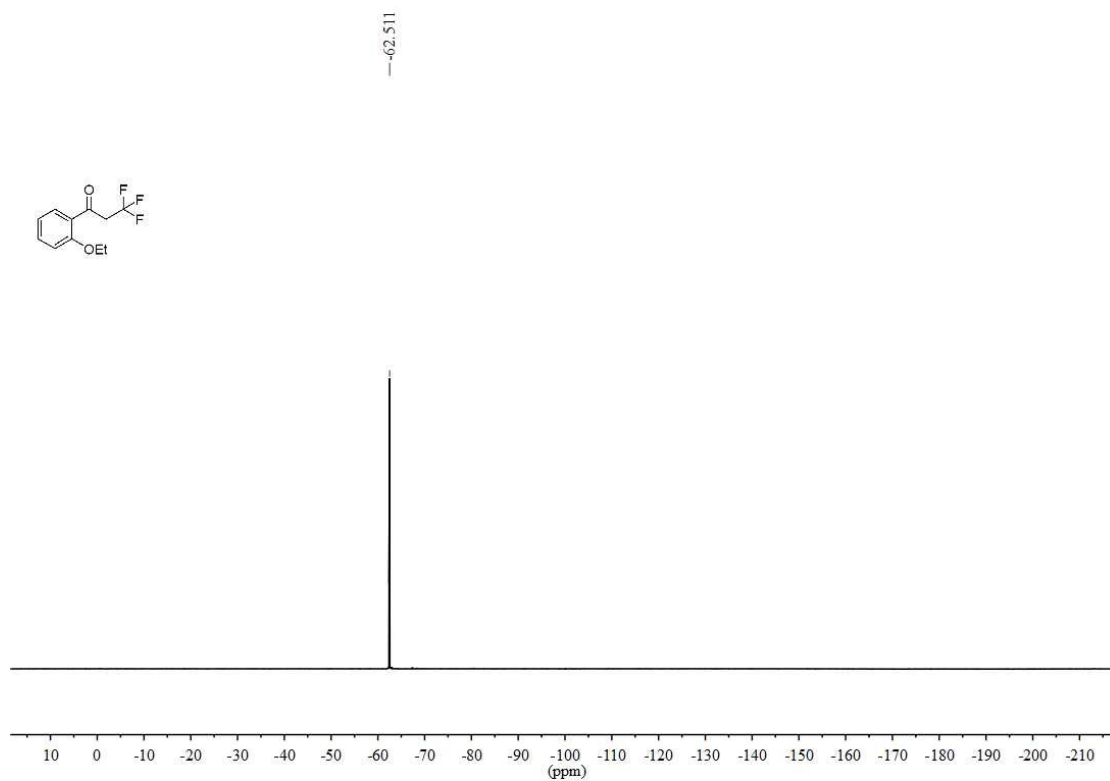

$^1\text{H}$  NMR (400 MHz,  $\text{CDCl}_3$ ) of compound **3v**

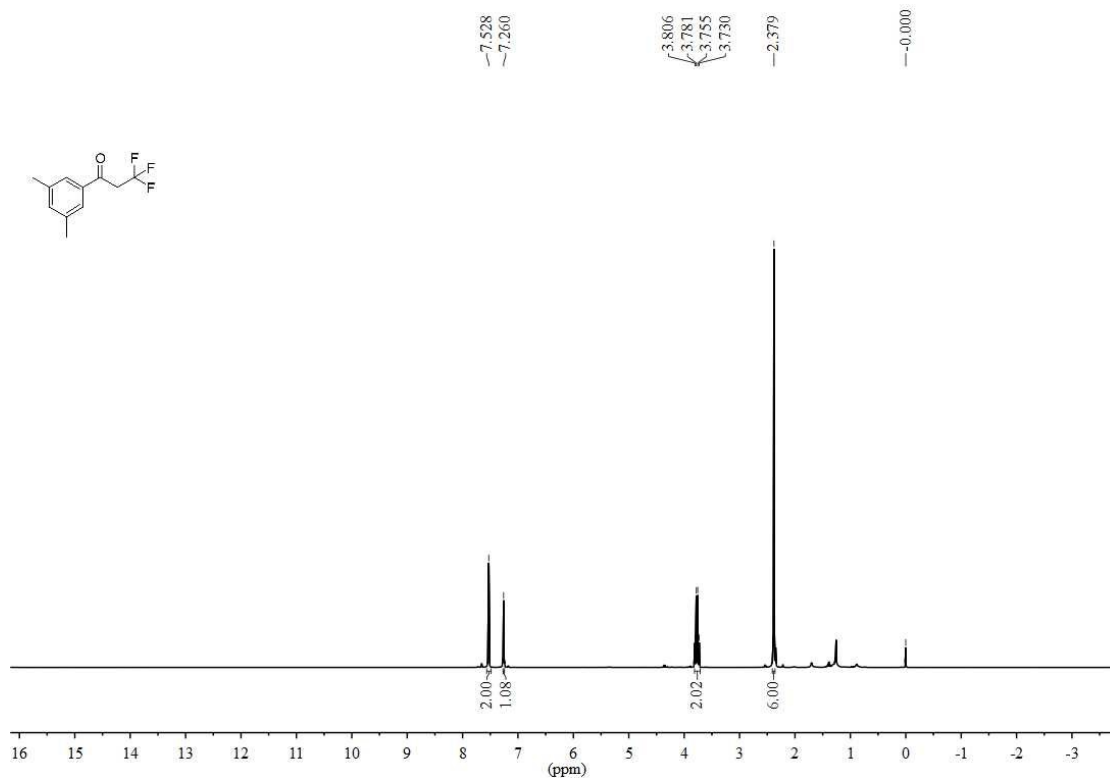

$^{13}\text{C}\{^1\text{H}\}$  NMR (100 MHz,  $\text{CDCl}_3$ ) of compound **3v**

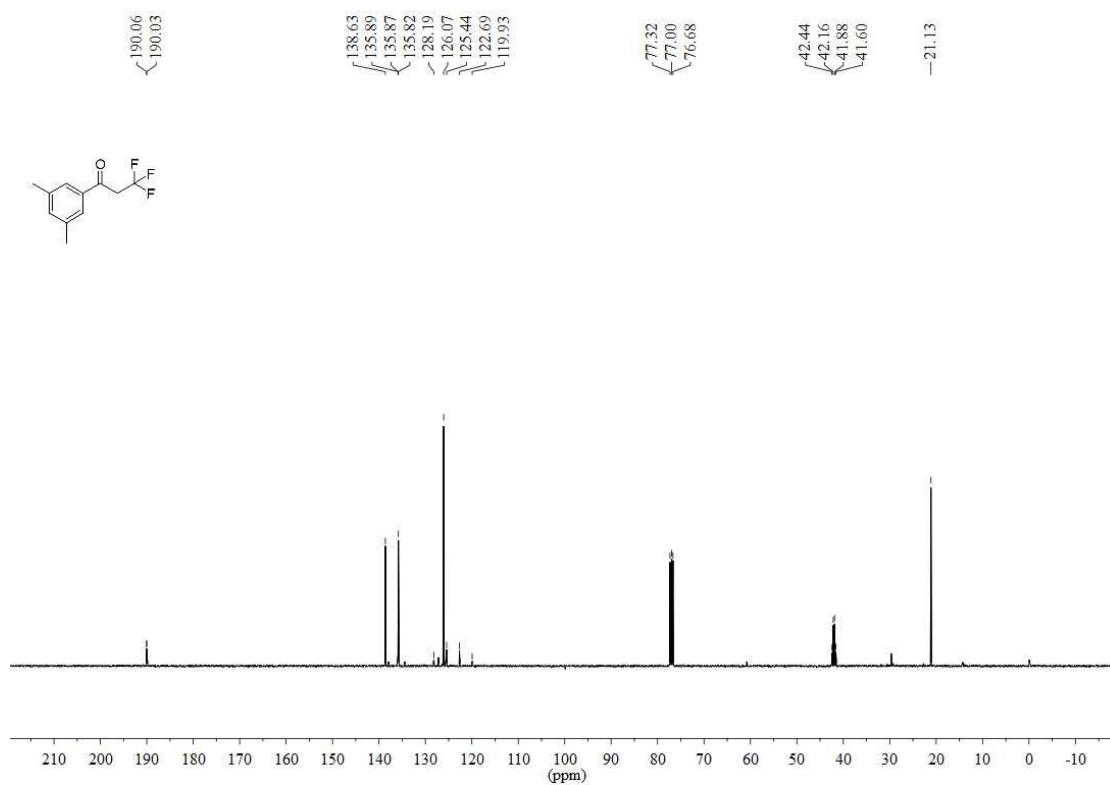

$^{19}\text{F}$  NMR (376 MHz,  $\text{CDCl}_3$ ) of compound **3v**

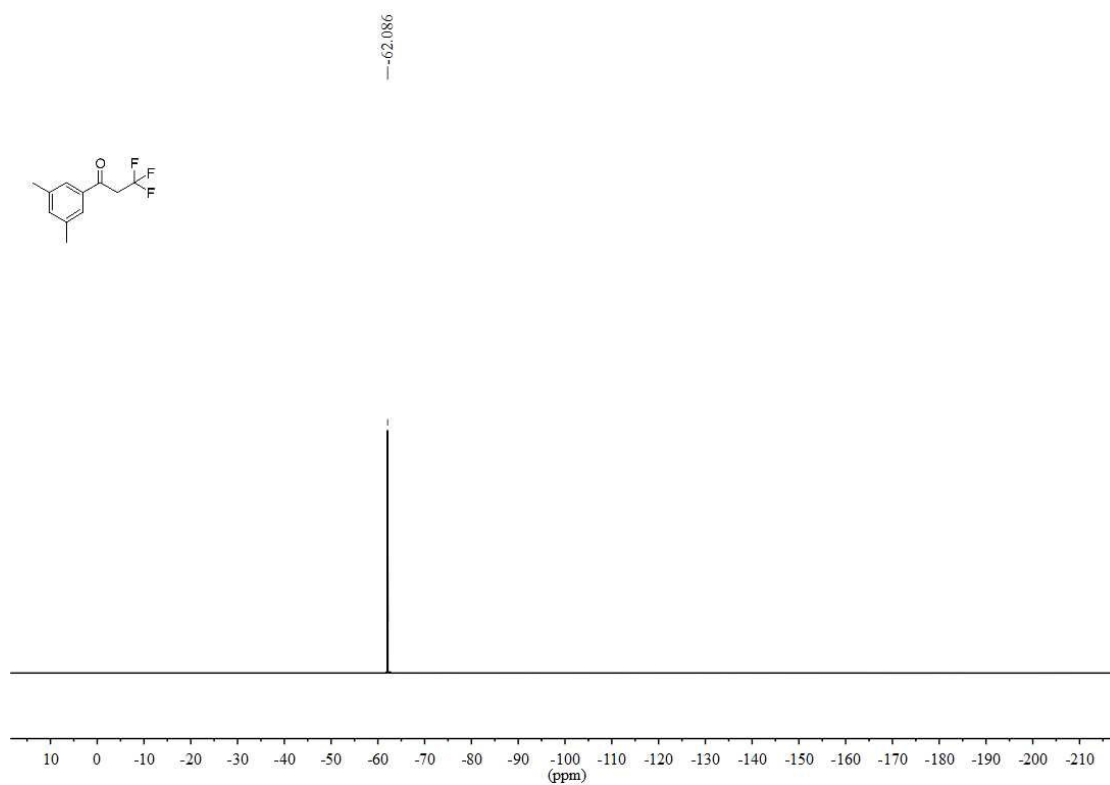

$^{19}\text{F}$  NMR (376 MHz,  $\text{CDCl}_3$ ) of compound **3w**

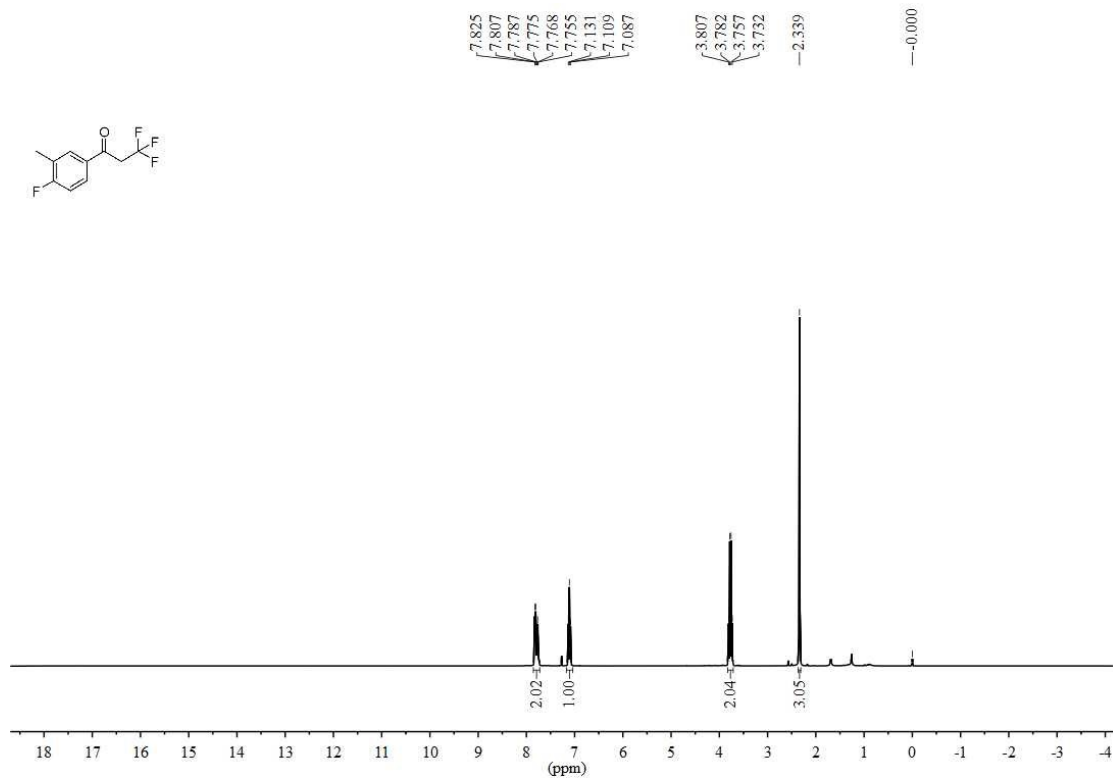

$^{13}\text{C}\{^1\text{H}\}$  NMR (100 MHz,  $\text{CDCl}_3$ ) of compound **3w**

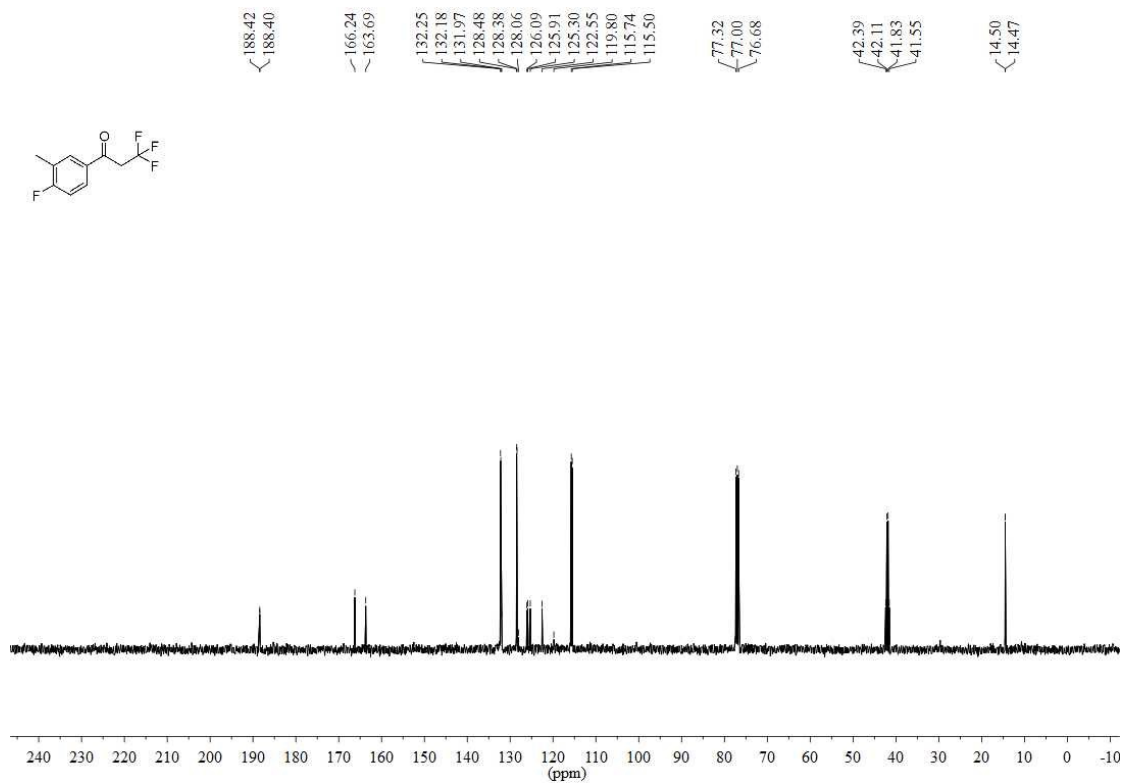

$^{19}\text{F}$  NMR (376 MHz,  $\text{CDCl}_3$ ) of compound **3w**

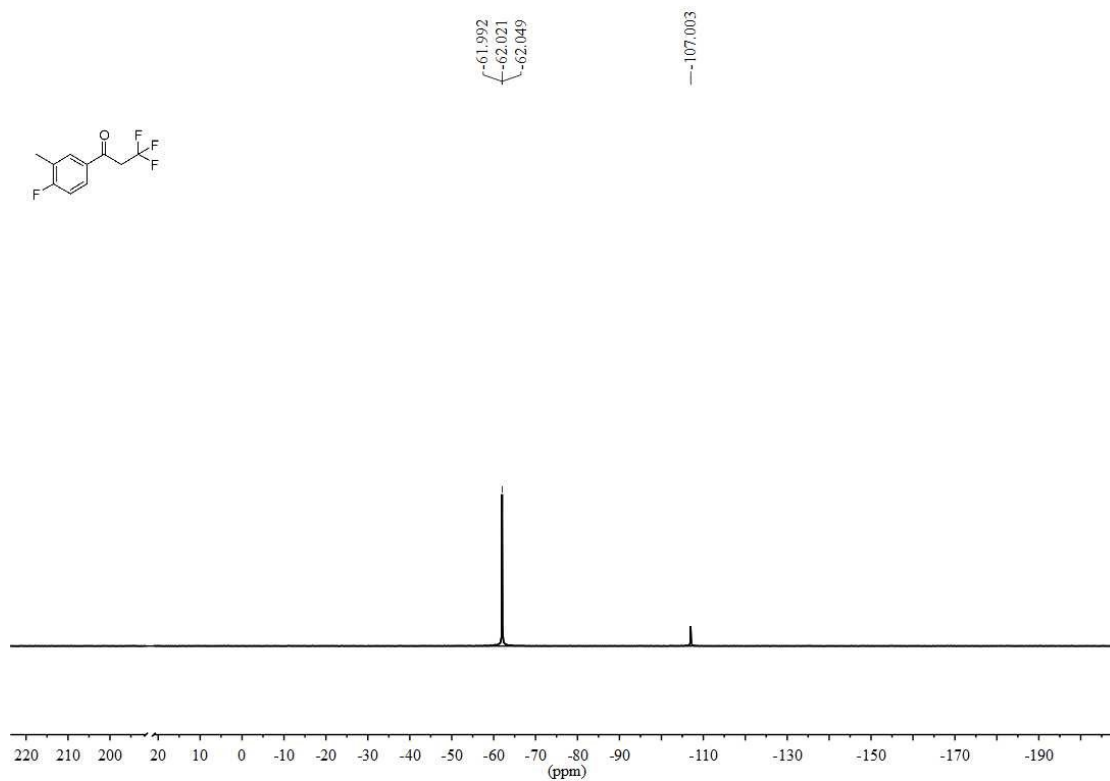

$^1\text{H}$  NMR (400 MHz,  $\text{CDCl}_3$ ) of compound **3x**

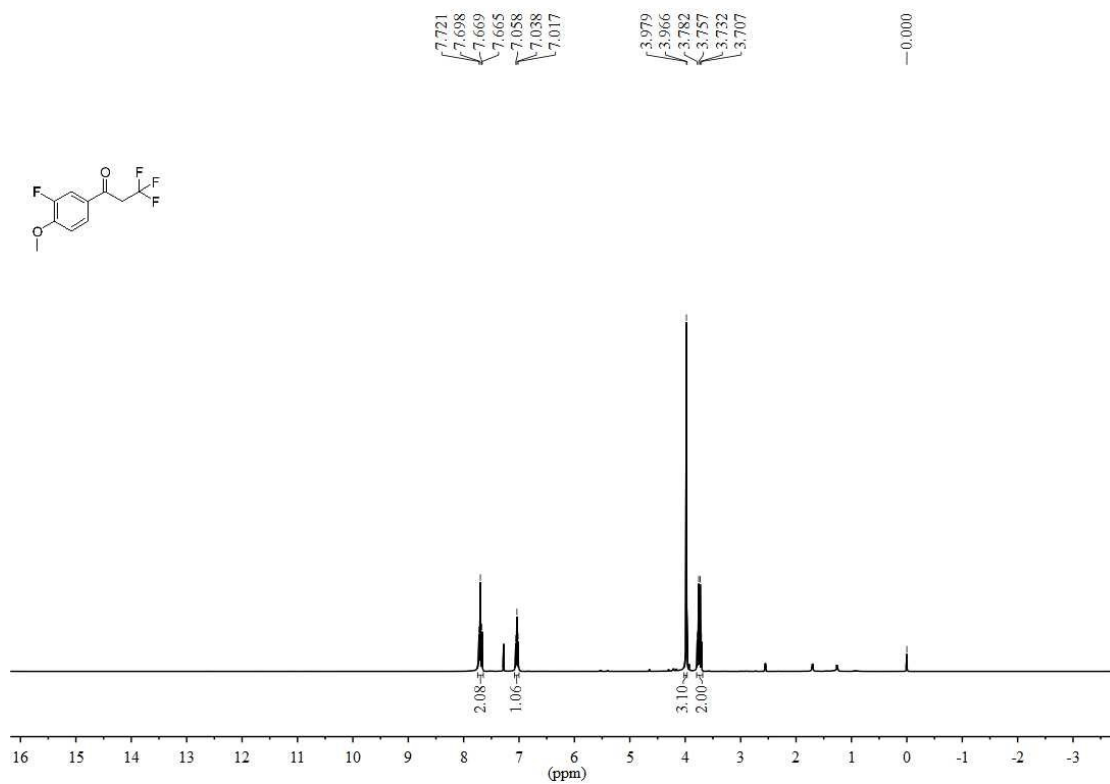

$^{13}\text{C}\{^1\text{H}\}$  NMR (100 MHz,  $\text{CDCl}_3$ ) of compound **3x**

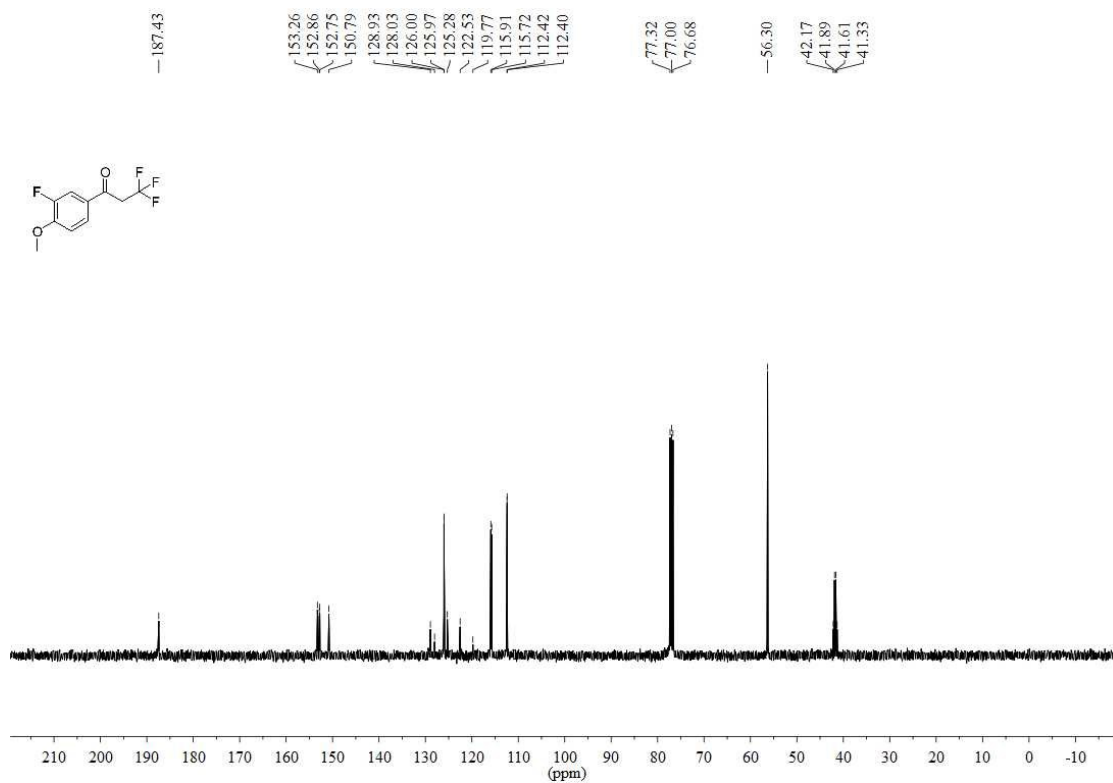

<sup>19</sup>F NMR (376 MHz, CDCl<sub>3</sub>) of compound **3x**

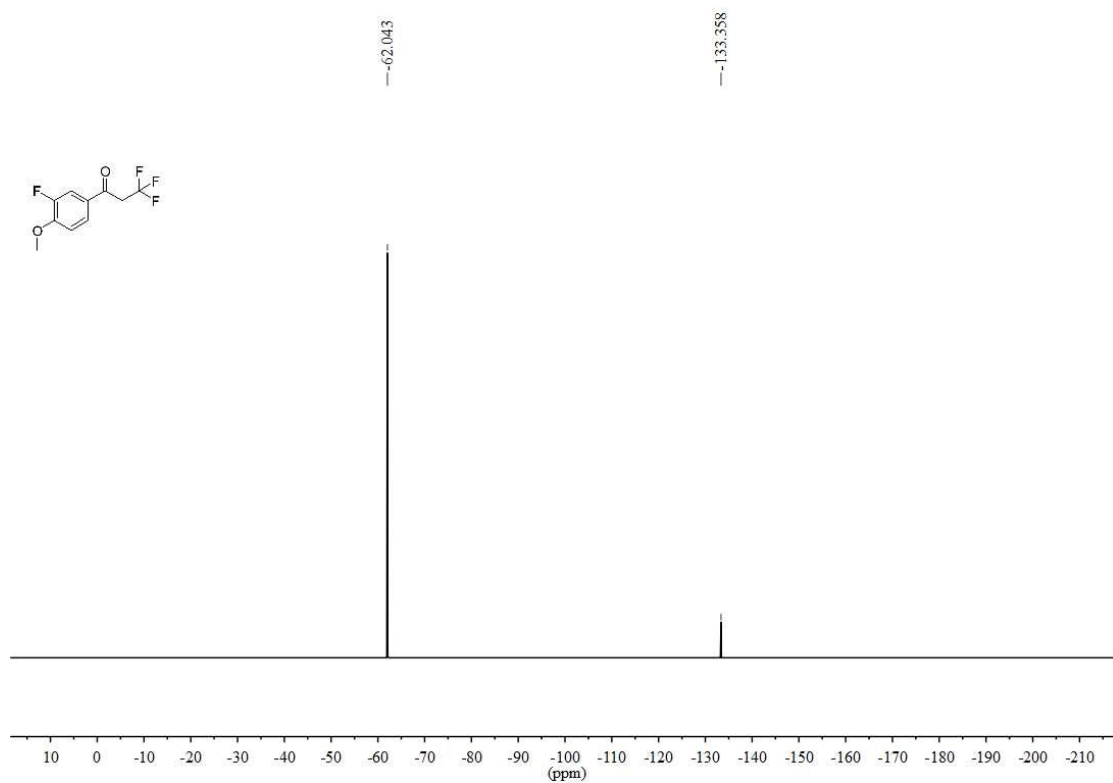

<sup>1</sup>H NMR (400 MHz, CDCl<sub>3</sub>) of compound **3y**

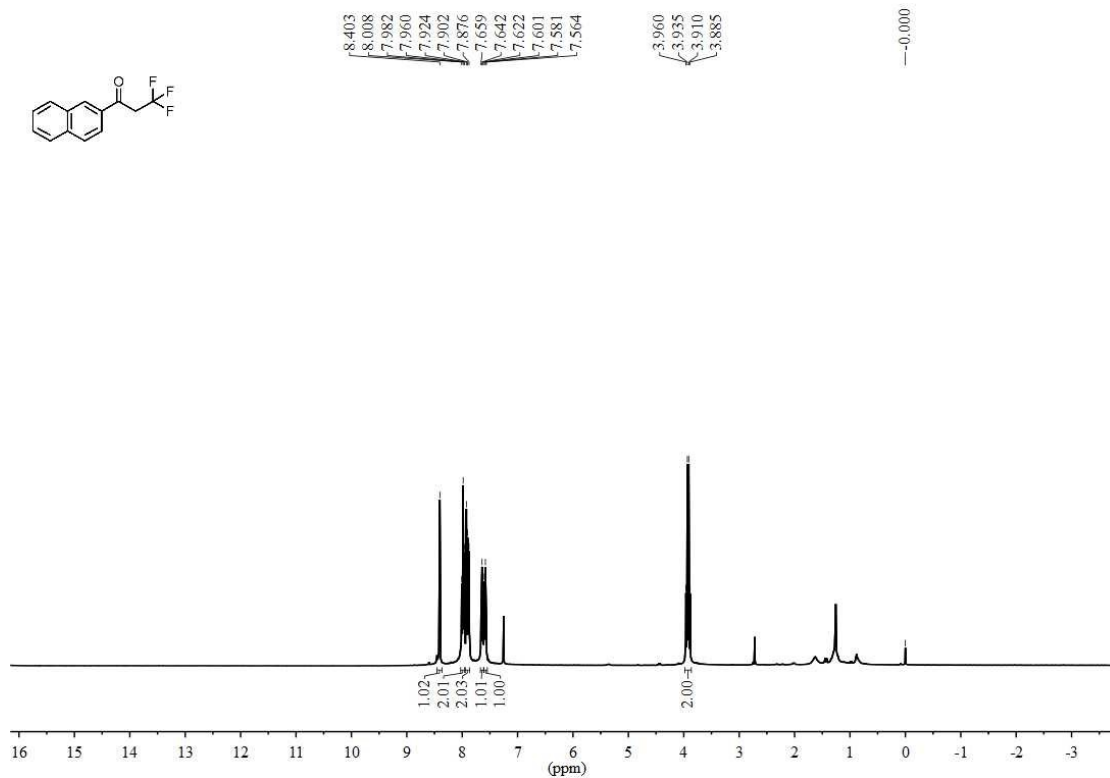

$^{13}\text{C}\{^1\text{H}\}$  NMR (100 MHz,  $\text{CDCl}_3$ ) of compound **3y**

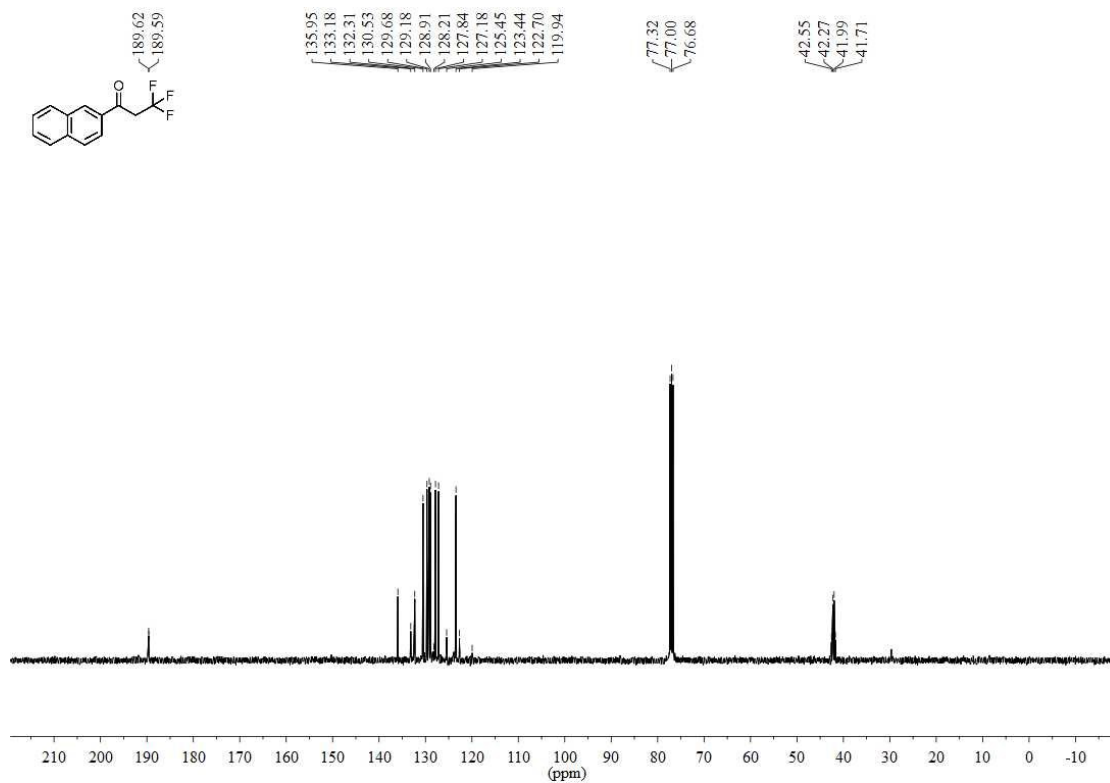

$^{19}\text{F}$  NMR (376 MHz,  $\text{CDCl}_3$ ) of compound **3y**

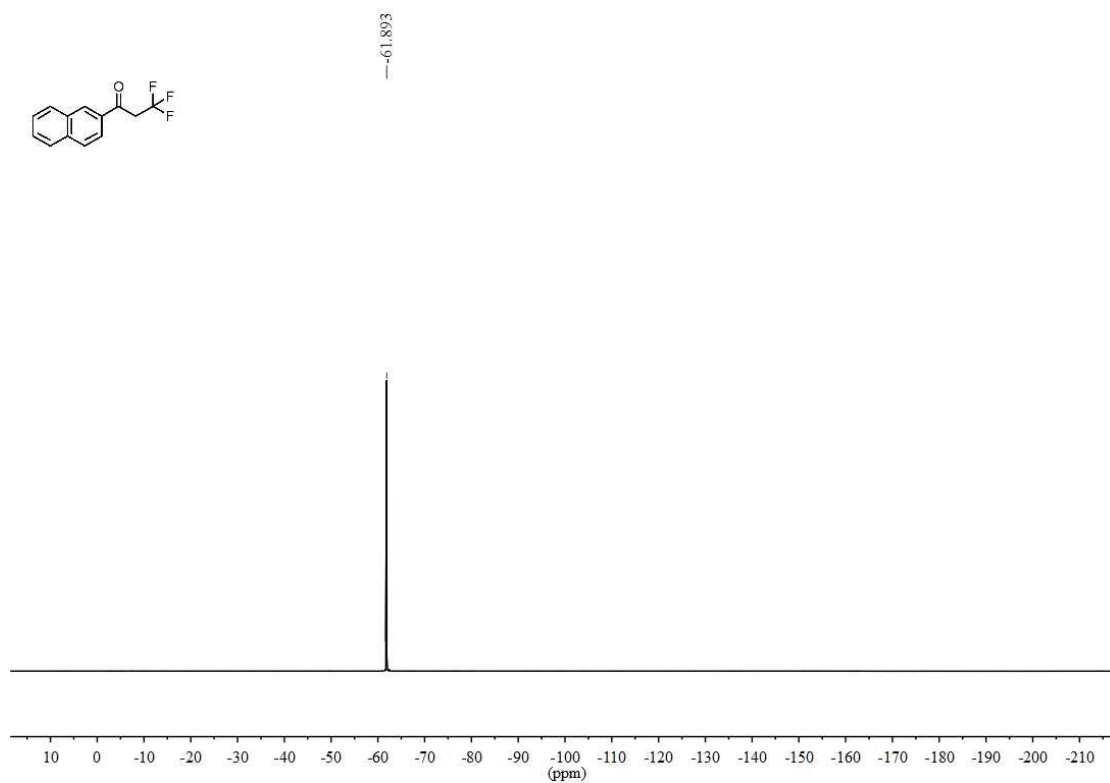

<sup>1</sup>H NMR (400 MHz, CDCl<sub>3</sub>) of compound **3z**

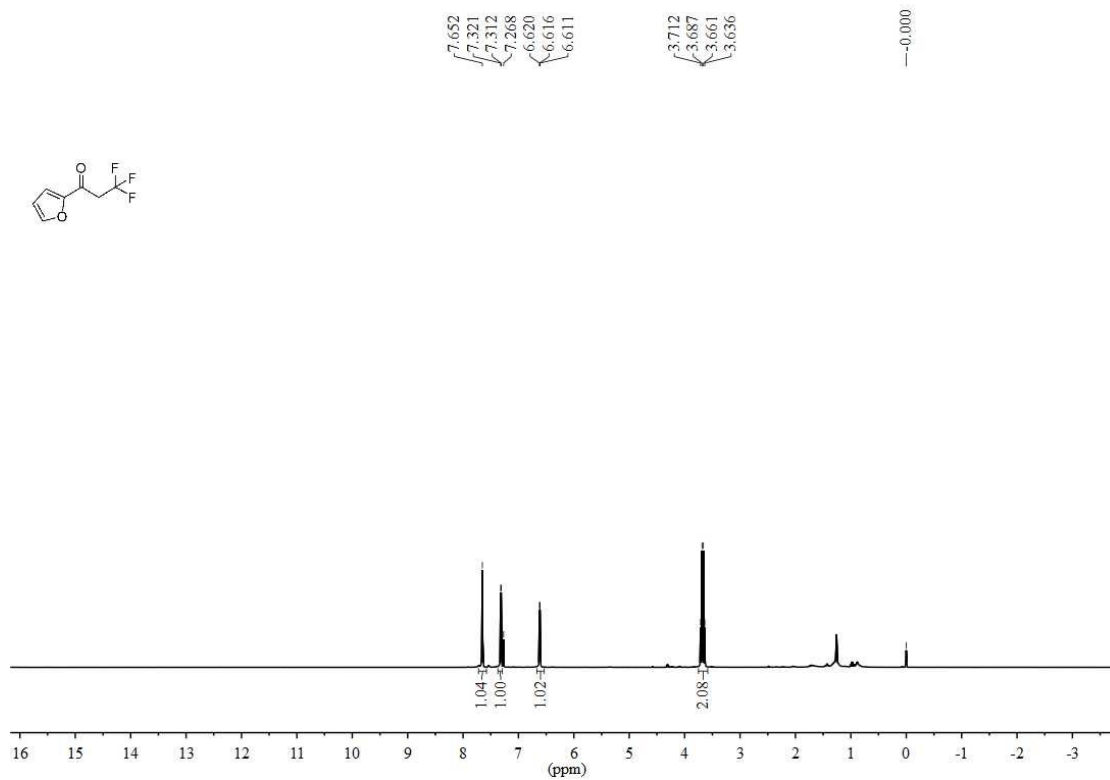

<sup>13</sup>C{<sup>1</sup>H} NMR (100 MHz, CDCl<sub>3</sub>) of compound **3z**



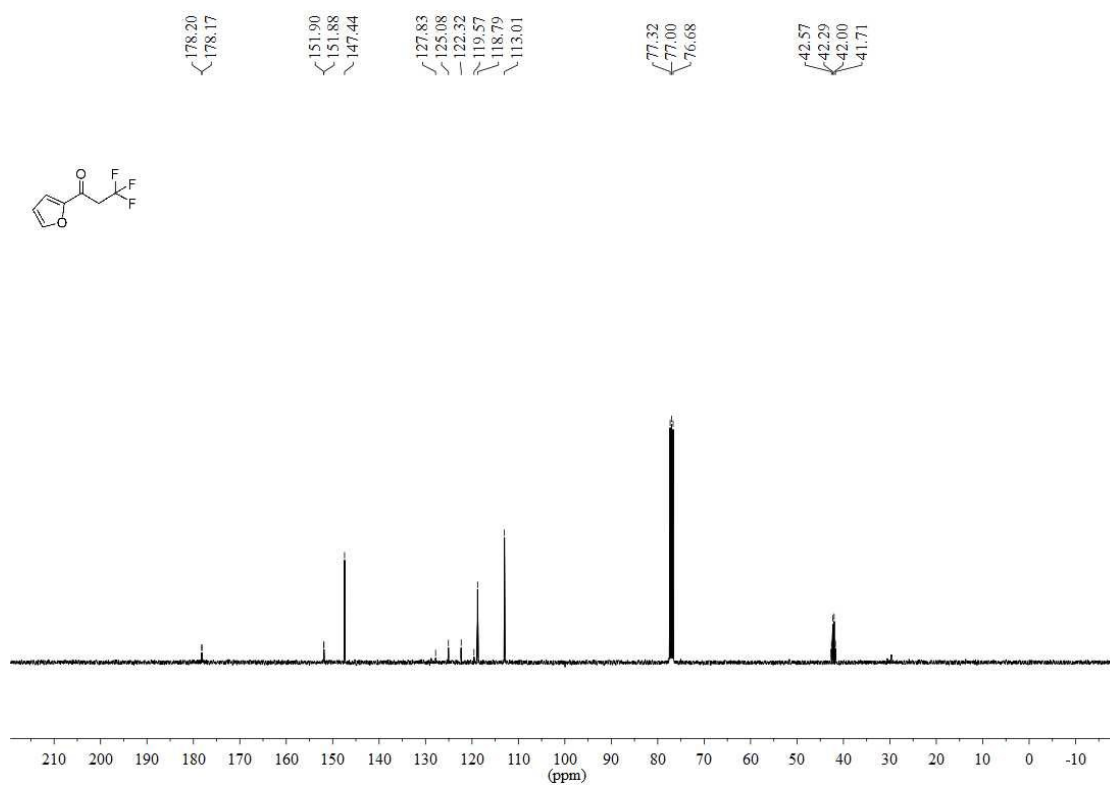

$^{19}\text{F}$  NMR (376 MHz,  $\text{CDCl}_3$ ) of compound **3z**

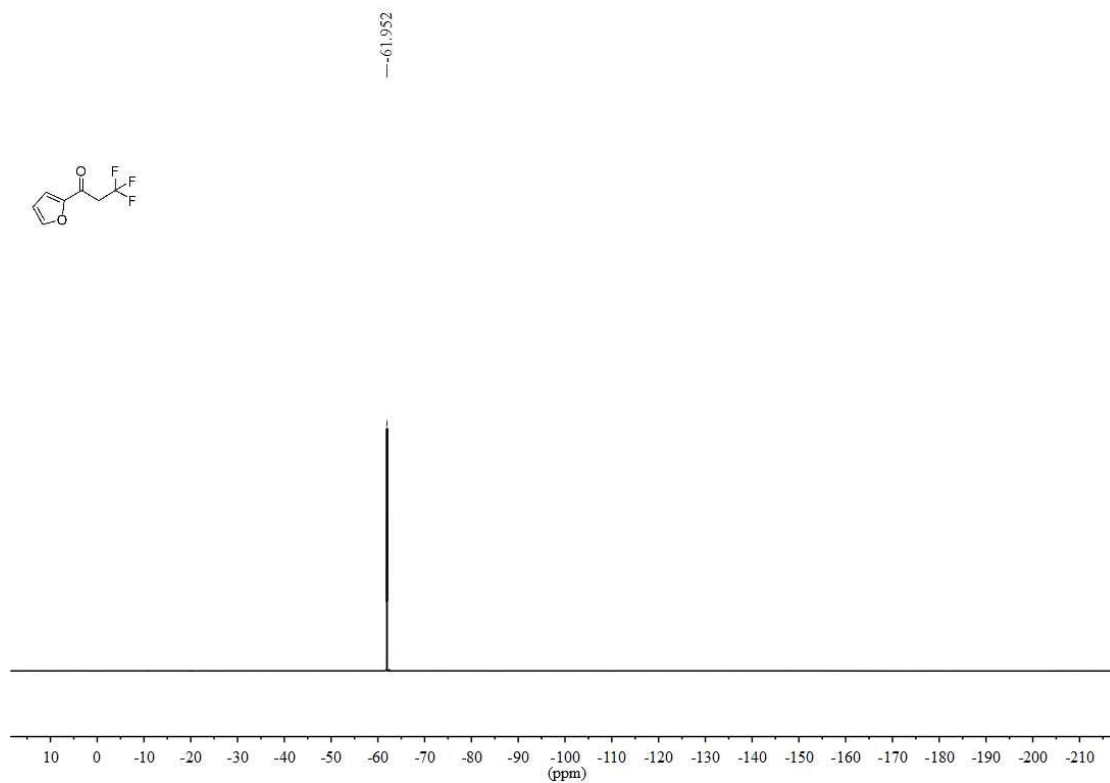

$^1\text{H}$  NMR (400 MHz,  $\text{CDCl}_3$ ) of compound **3aa**

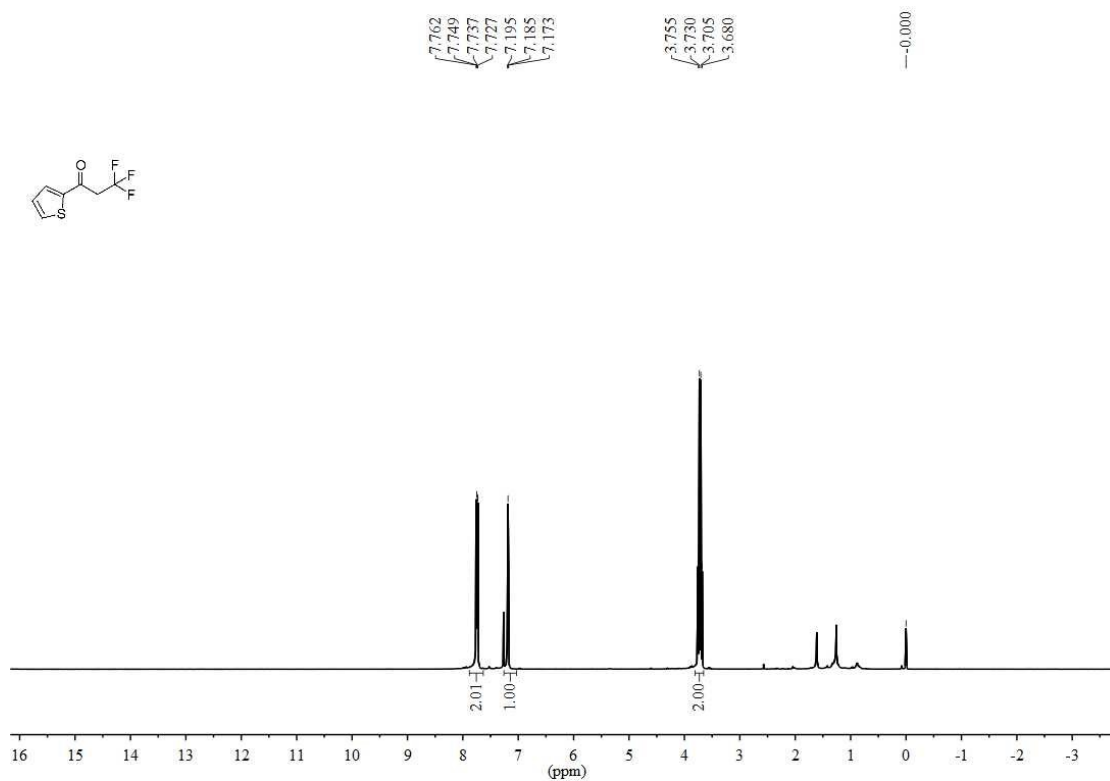

$^{13}\text{C}\{^1\text{H}\}$  NMR (100 MHz,  $\text{CDCl}_3$ ) of compound **3aa**

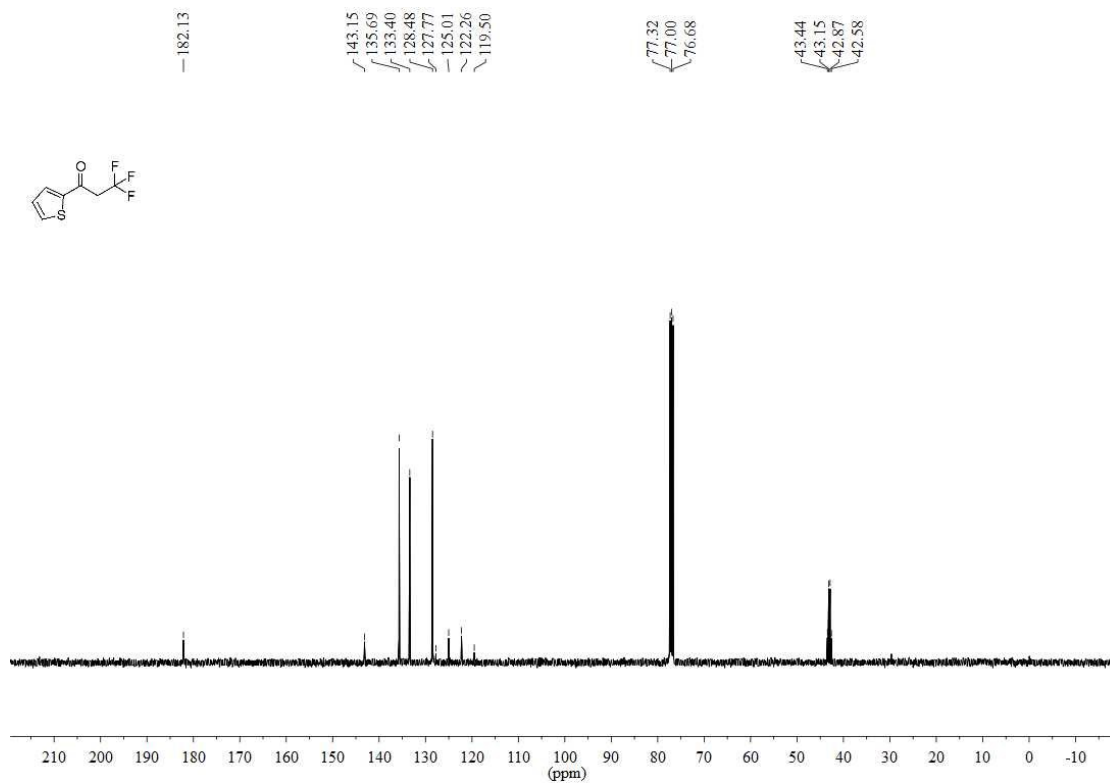

$^{19}\text{F}$  NMR (376 MHz,  $\text{CDCl}_3$ ) of compound **3aa**

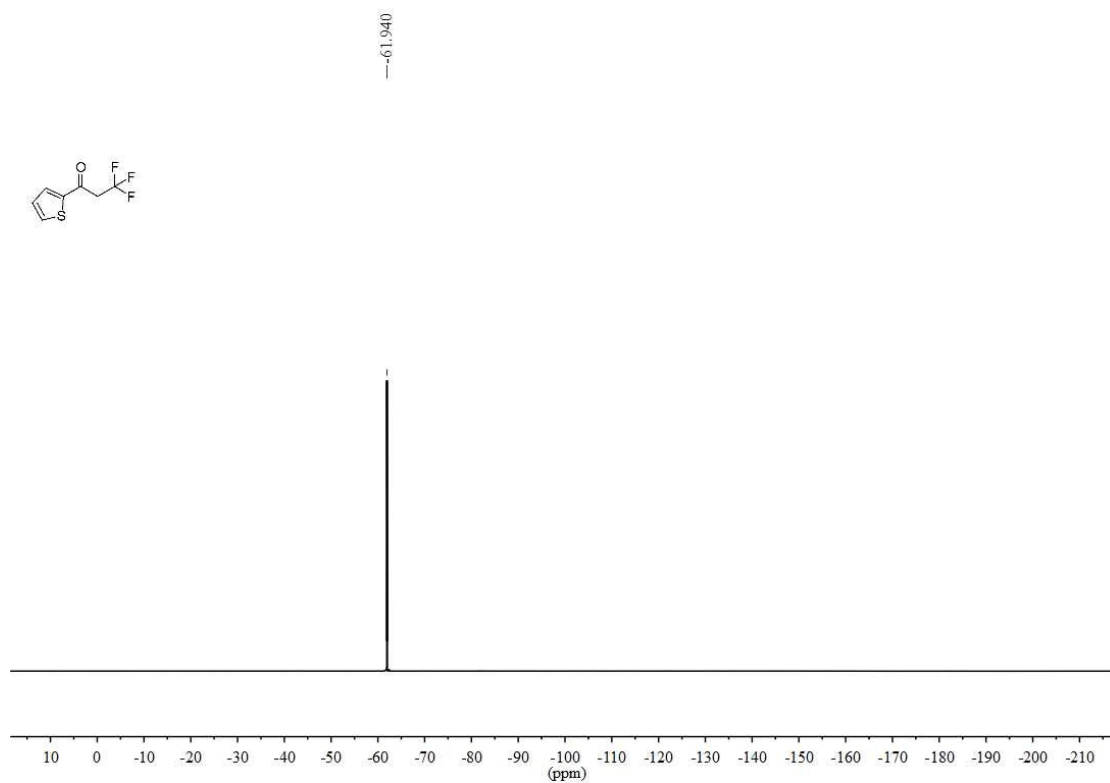

<sup>1</sup>H NMR (400 MHz, CDCl<sub>3</sub>) of compound **3ab**

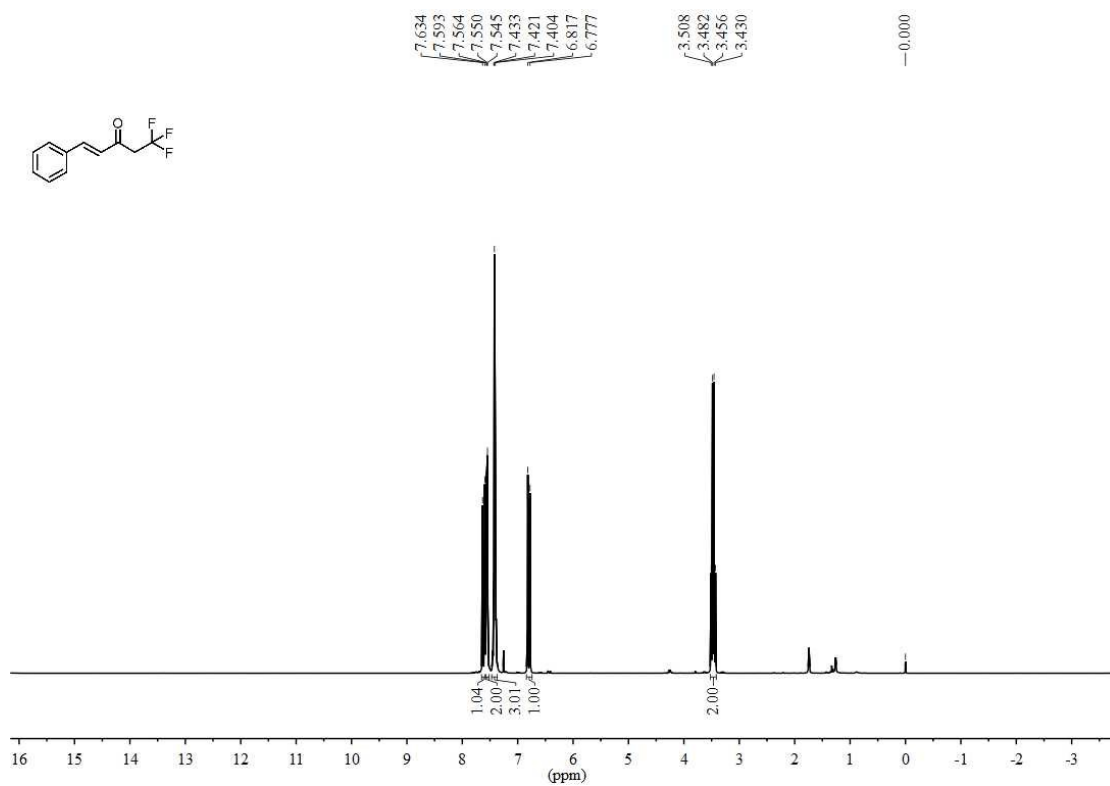

<sup>13</sup>C{<sup>1</sup>H} NMR (100 MHz, CDCl<sub>3</sub>) of compound **3ab**

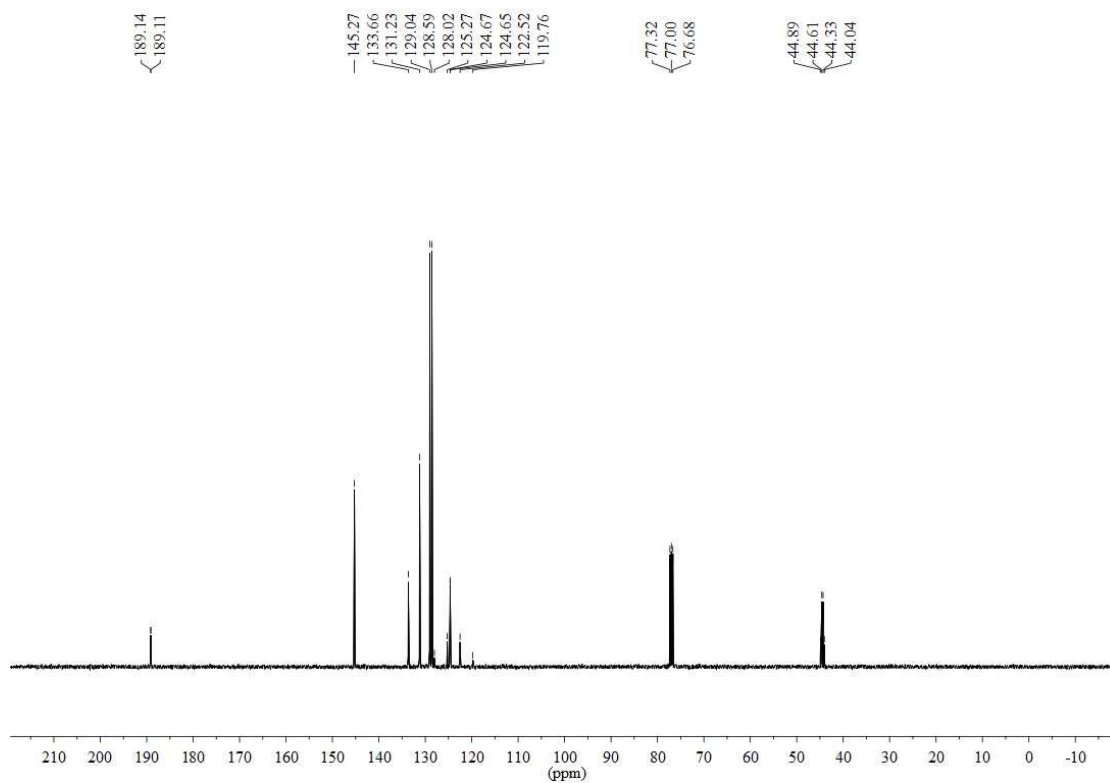

$^{13}\text{C}$  NMR (376 MHz,  $\text{CDCl}_3$ ) of compound **3ab**

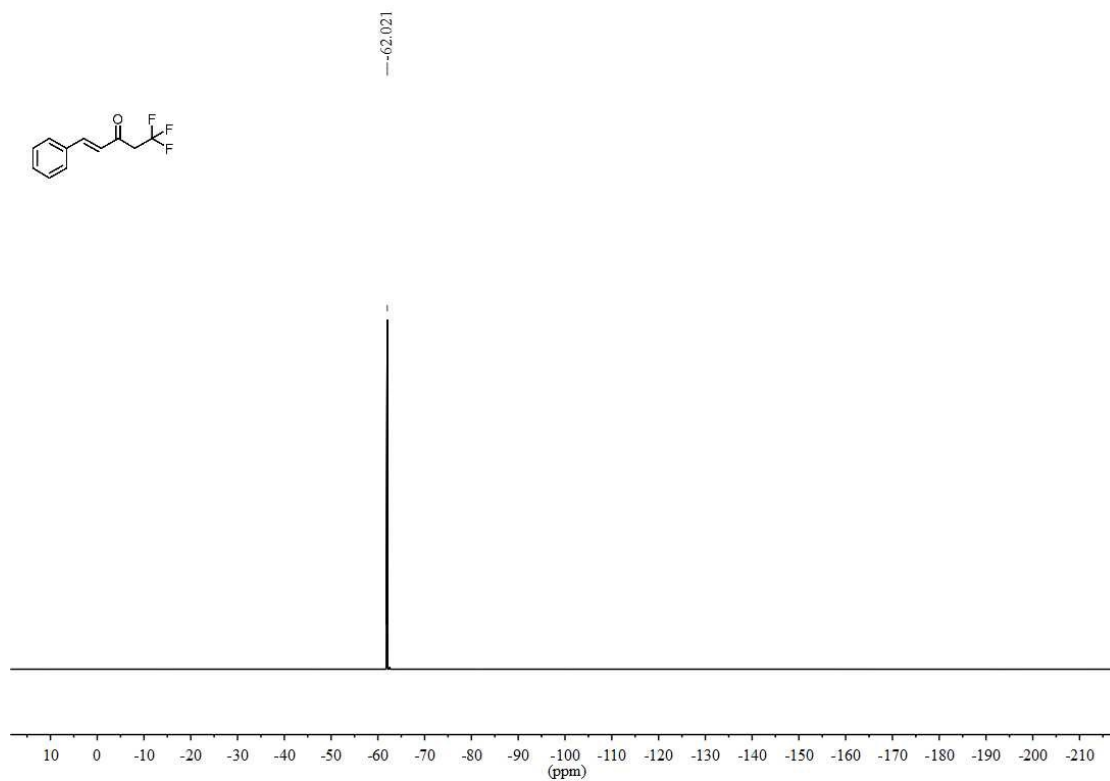

$^1\text{H}$  NMR (400 MHz,  $\text{CDCl}_3$ ) of compound **3ac**

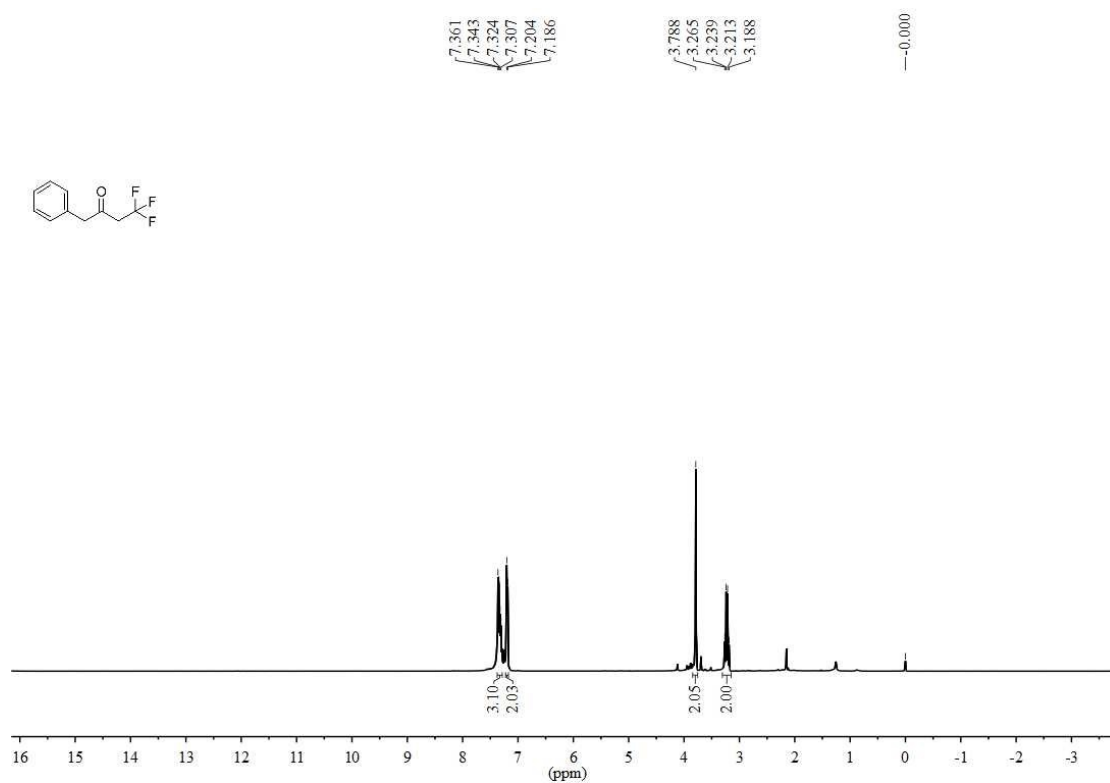

$^{13}\text{C}\{^1\text{H}\}$  NMR (100 MHz,  $\text{CDCl}_3$ ) of compound **3ac**

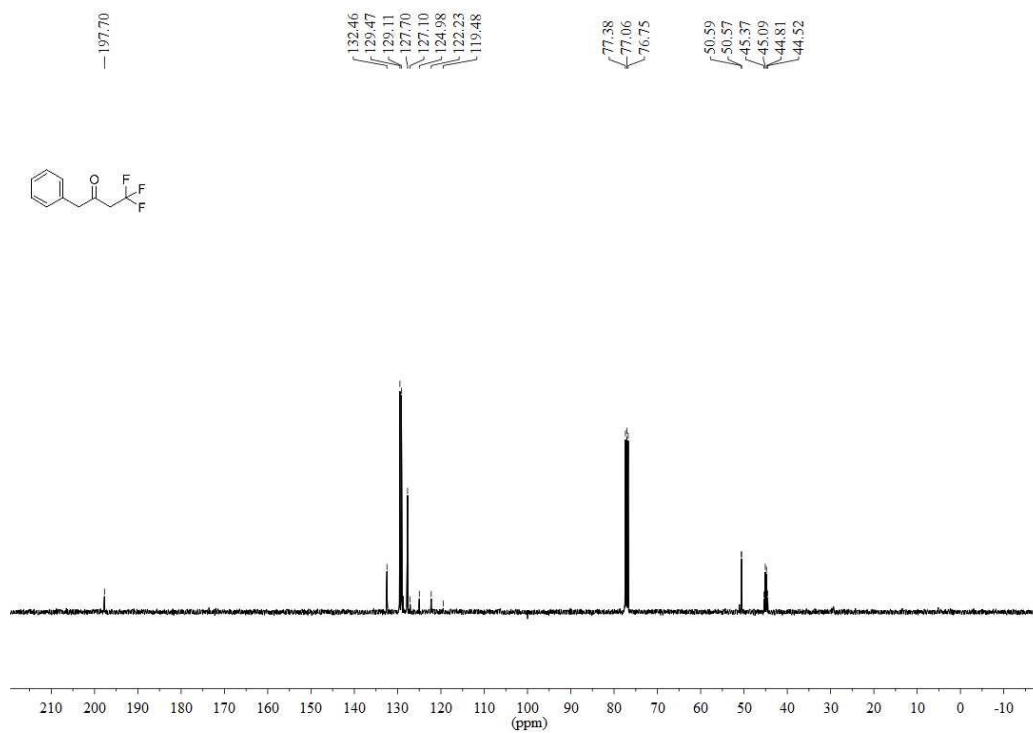

$^{19}\text{F}$  NMR (376 MHz,  $\text{CDCl}_3$ ) of compound **3ac**

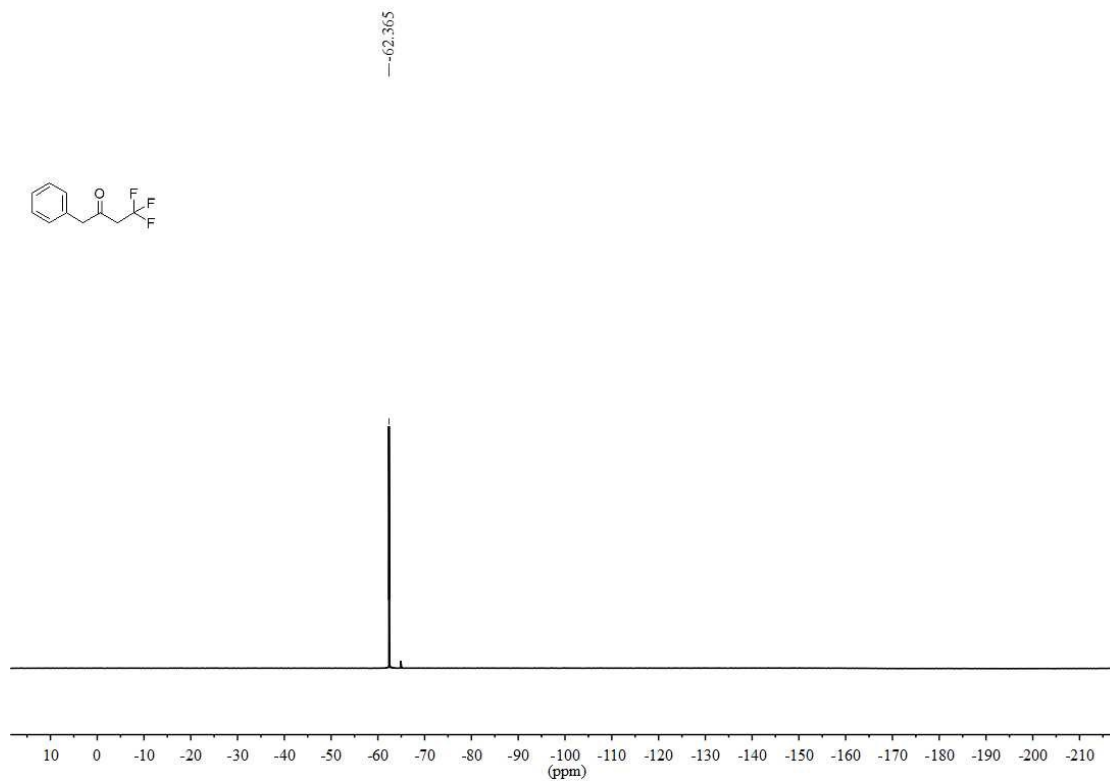

$^1\text{H}$  NMR (400 MHz,  $\text{CDCl}_3$ ) of compound **3ad**

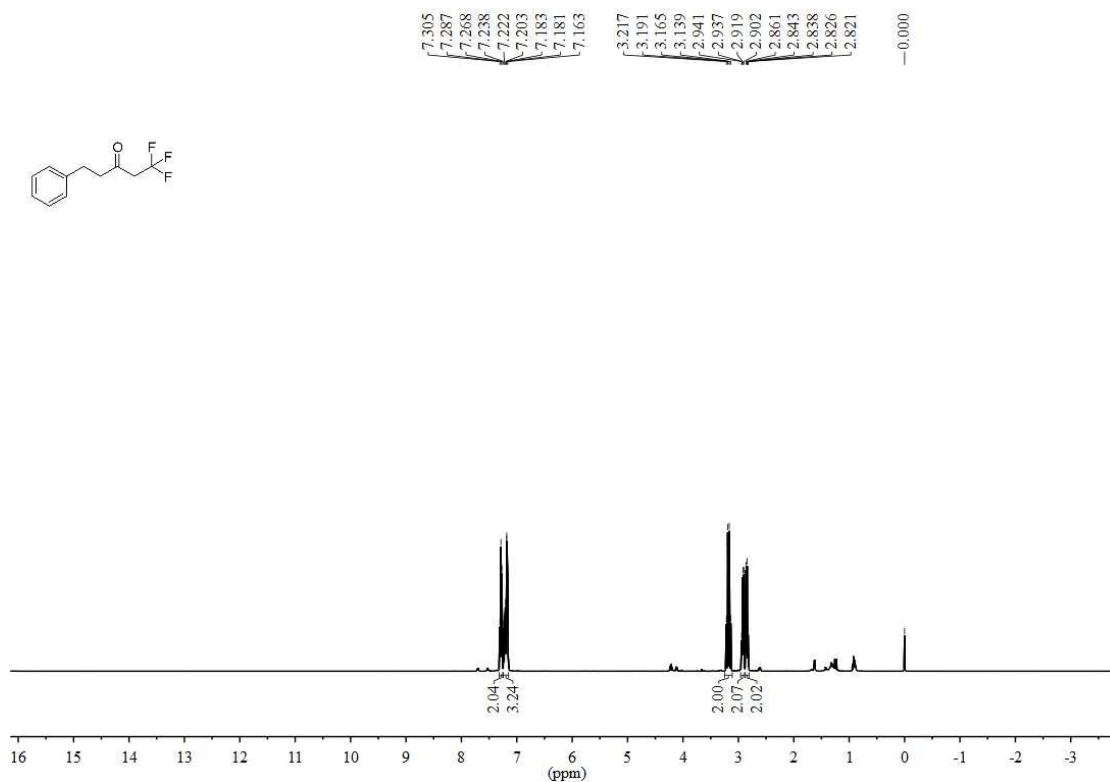

$^{13}\text{C}\{^1\text{H}\}$  NMR (100 MHz,  $\text{CDCl}_3$ ) of compound **3ad**

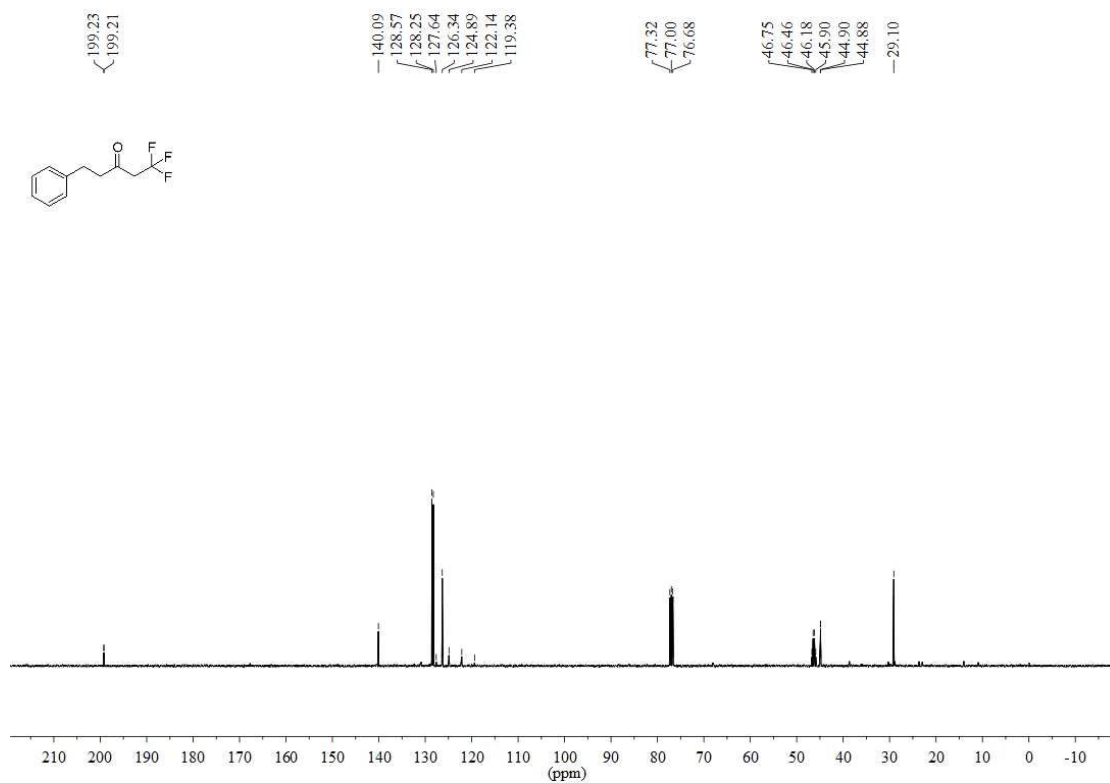

$^{19}\text{F}$  NMR (376 MHz,  $\text{CDCl}_3$ ) of compound **3ad**

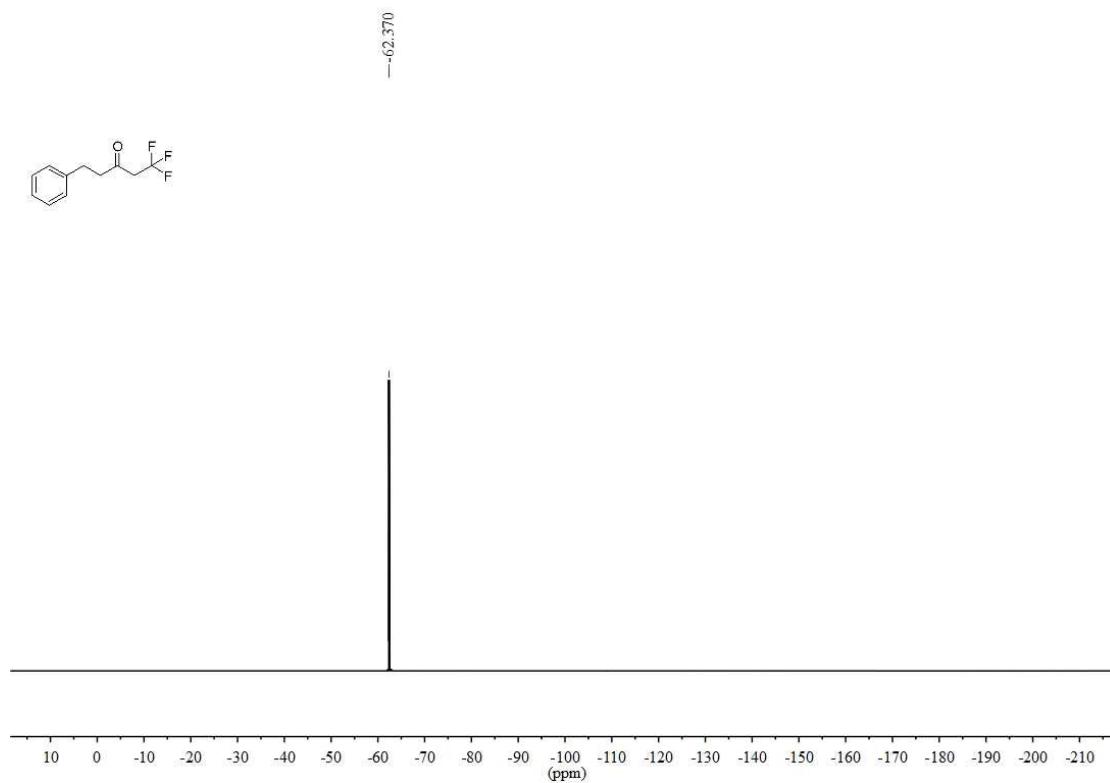

$^{19}\text{F}$  NMR (376 MHz,  $\text{CDCl}_3$ ) of compound **3ae**

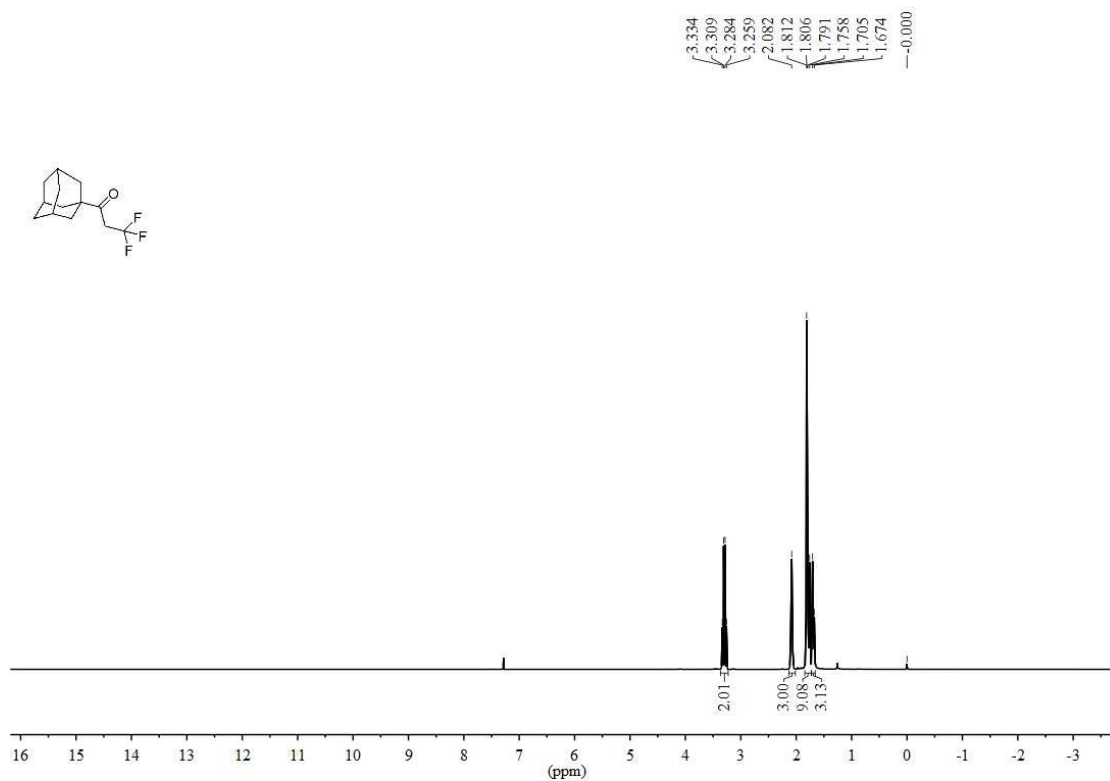

$^{13}\text{C}\{^1\text{H}\}$  NMR (100 MHz,  $\text{CDCl}_3$ ) of compound **3ae**

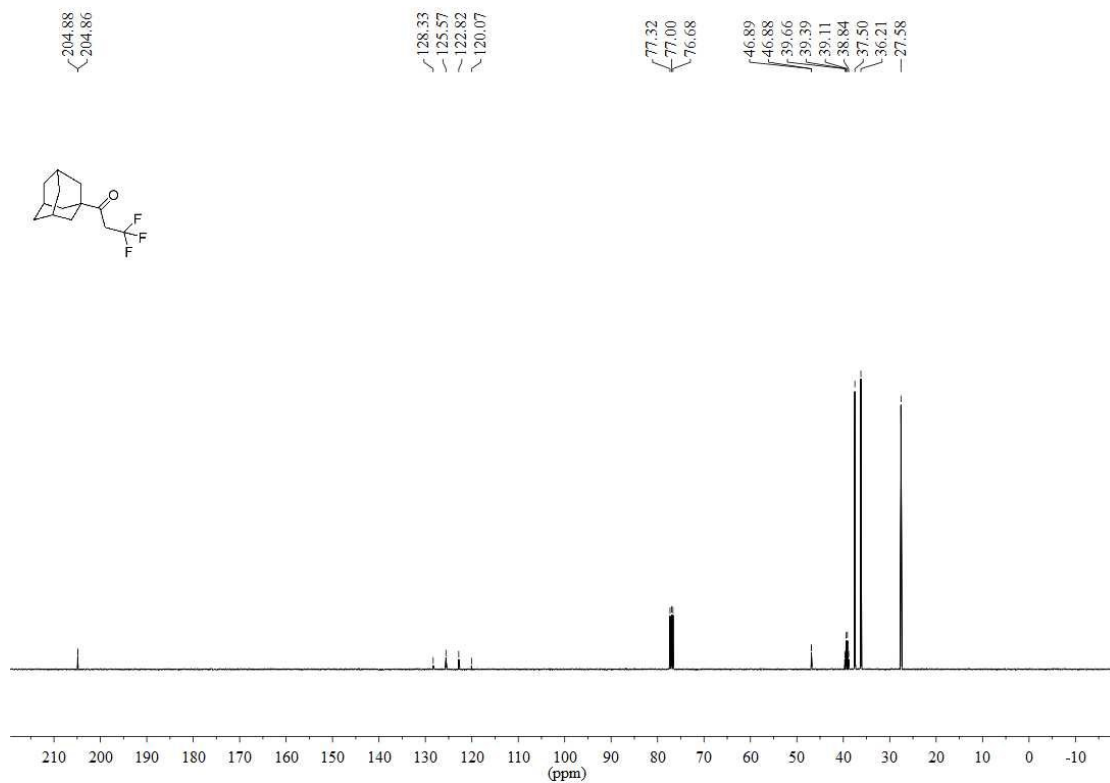

$^{19}\text{F}$  NMR (376 MHz,  $\text{CDCl}_3$ ) of compound **3ae**



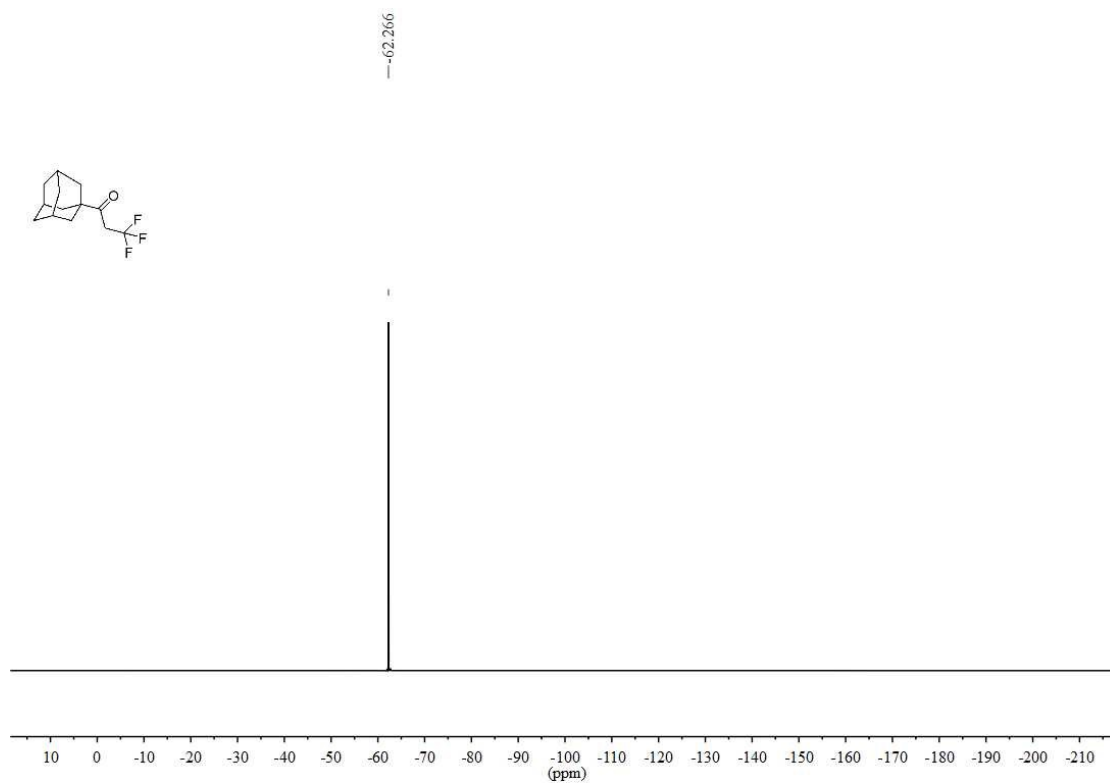

**<sup>1</sup>H NMR (400 MHz, CDCl<sub>3</sub>) of compound 3af**

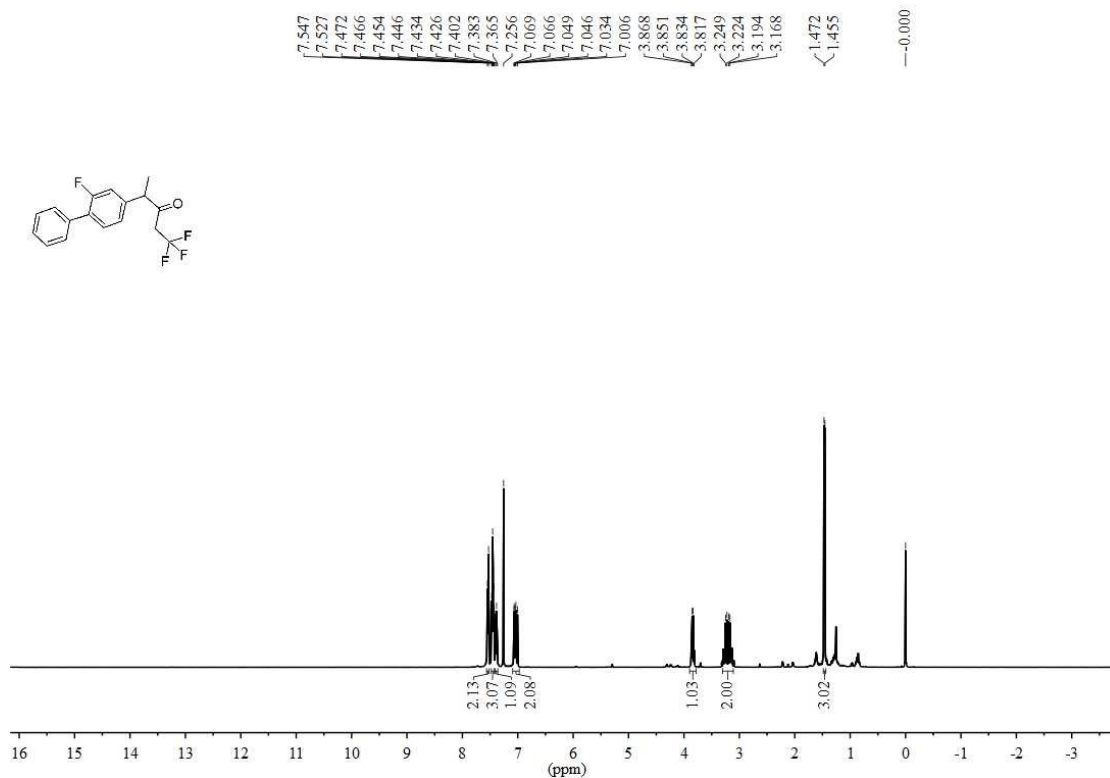

**<sup>13</sup>C{<sup>1</sup>H} NMR (100 MHz, CDCl<sub>3</sub>) of compound 3af**

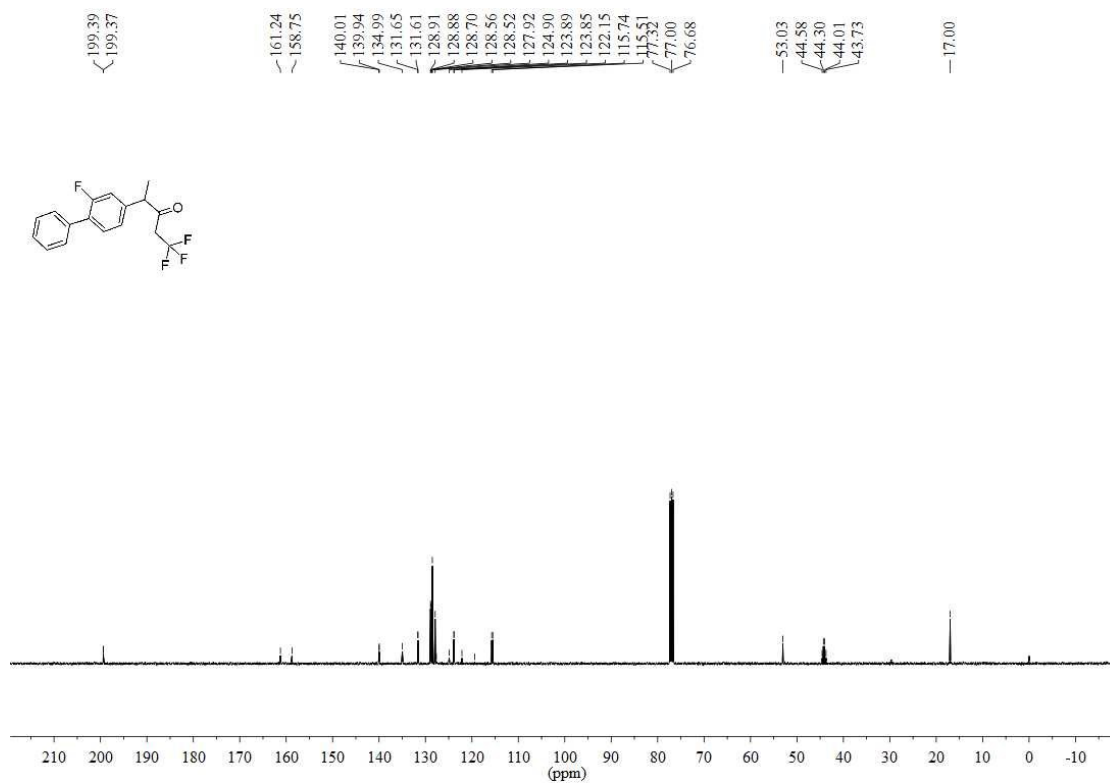

<sup>19</sup>F NMR (376 MHz, CDCl<sub>3</sub>) of compound **3af**

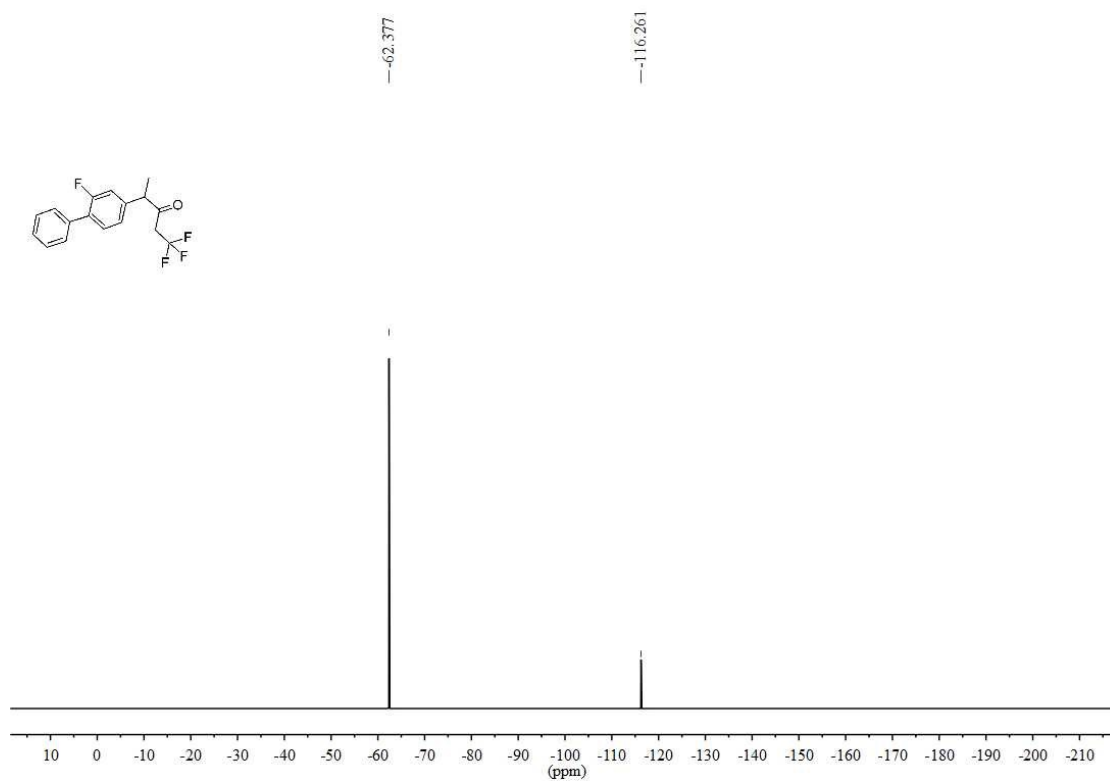

<sup>1</sup>H NMR (400 MHz, CDCl<sub>3</sub>) of compound **3ag**

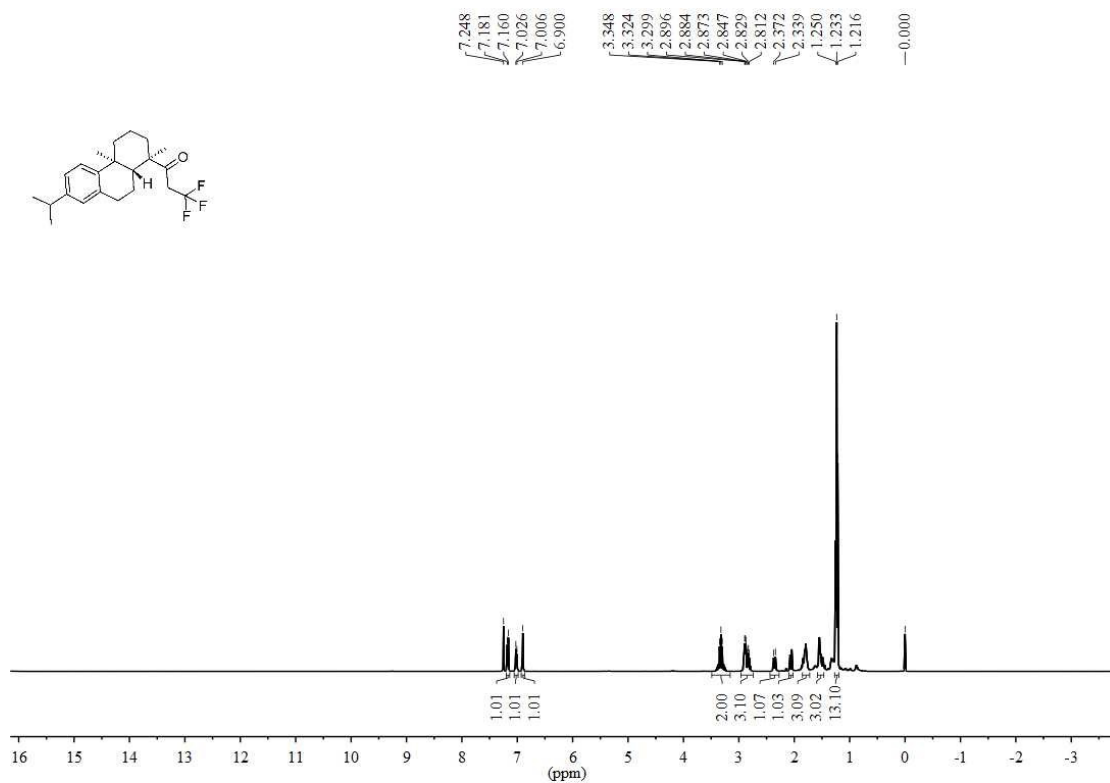

$^{13}\text{C}\{^1\text{H}\}$  NMR (100 MHz,  $\text{CDCl}_3$ ) of compound **3ag**

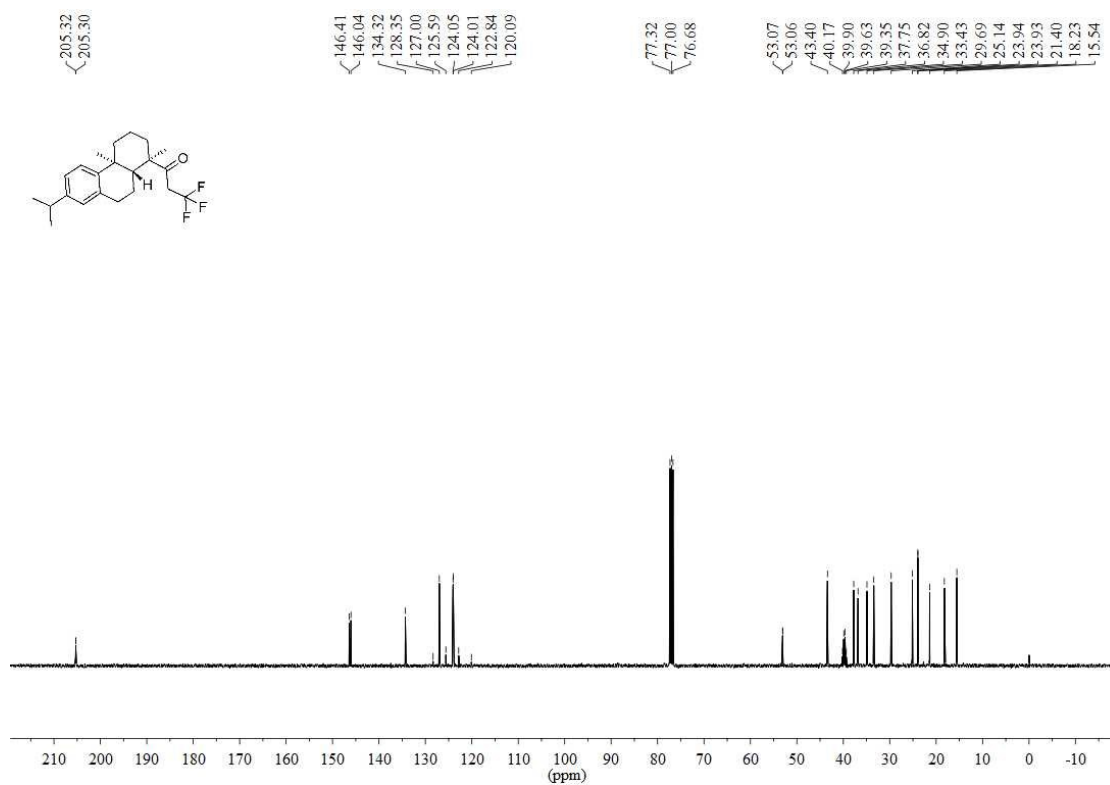

$^{19}\text{F}$  NMR (376 MHz,  $\text{CDCl}_3$ ) of compound **3ag**

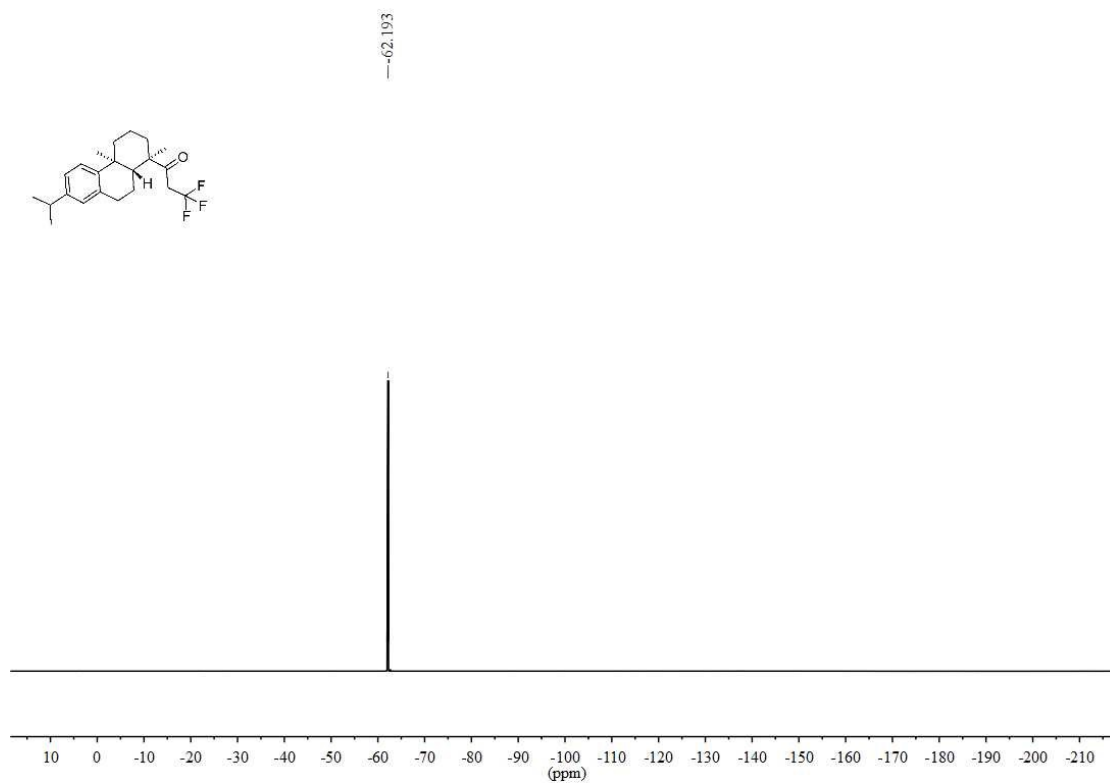

$^1\text{H}$  NMR (400 MHz,  $\text{CDCl}_3$ ) of compound **3ah**

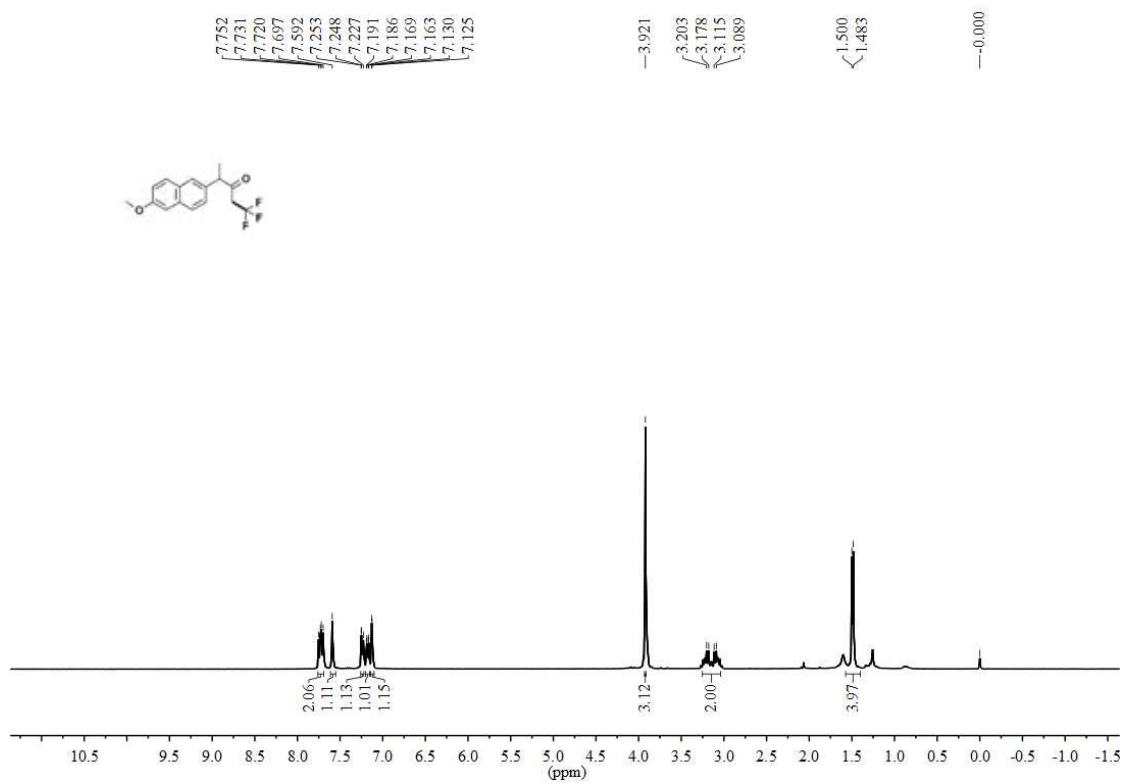

$^{13}\text{C}\{^1\text{H}\}$  NMR (100 MHz,  $\text{CDCl}_3$ ) of compound **3ah**

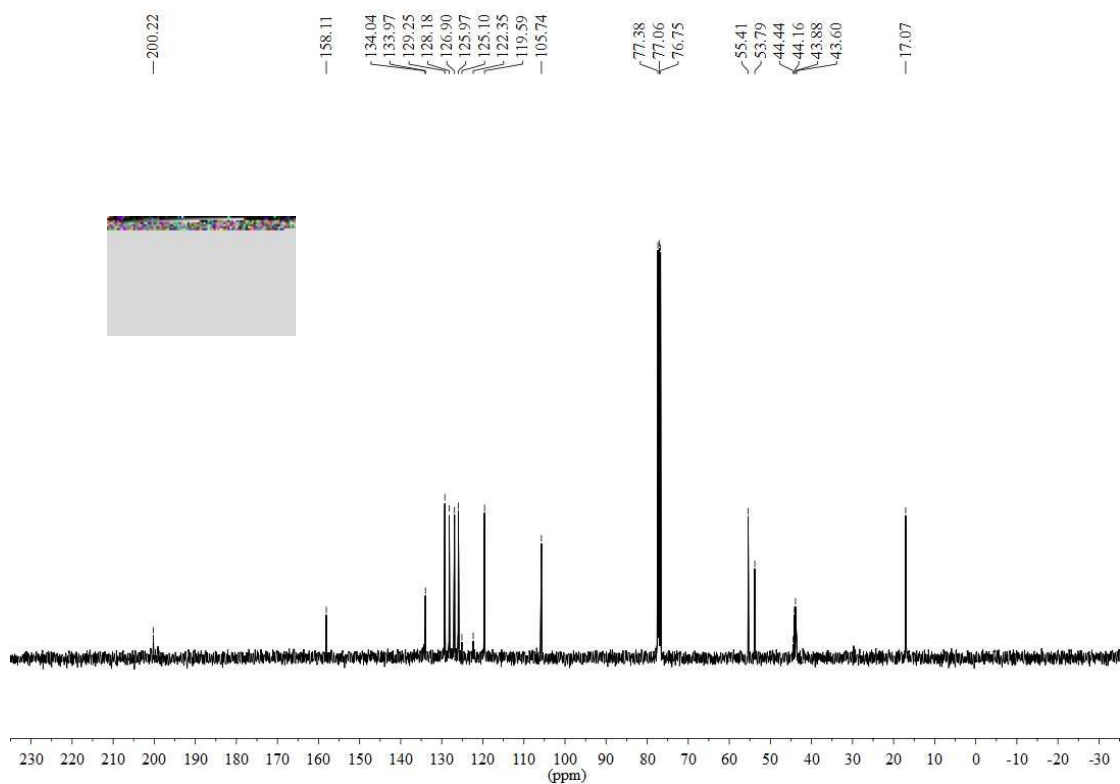

$^{19}\text{F}$  NMR (376 MHz,  $\text{CDCl}_3$ ) of compound **3ah**

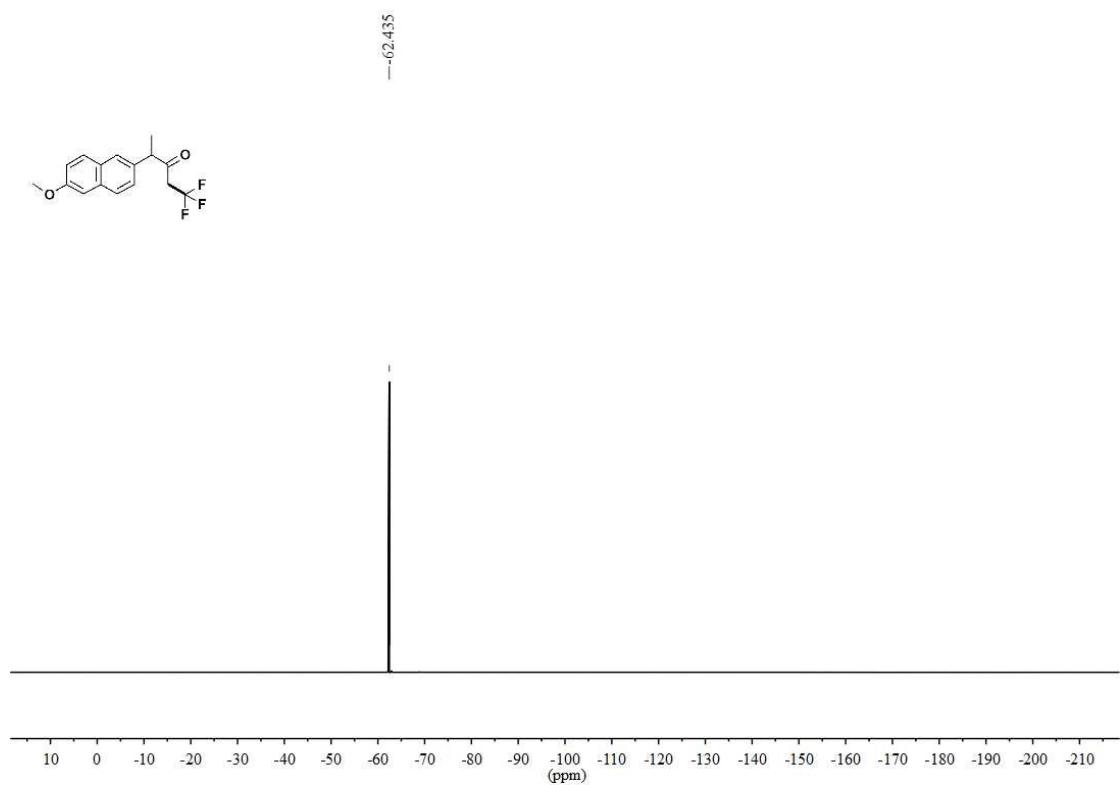

$^1\text{H}$  NMR (400 MHz,  $\text{CDCl}_3$ ) of compound **3ai**

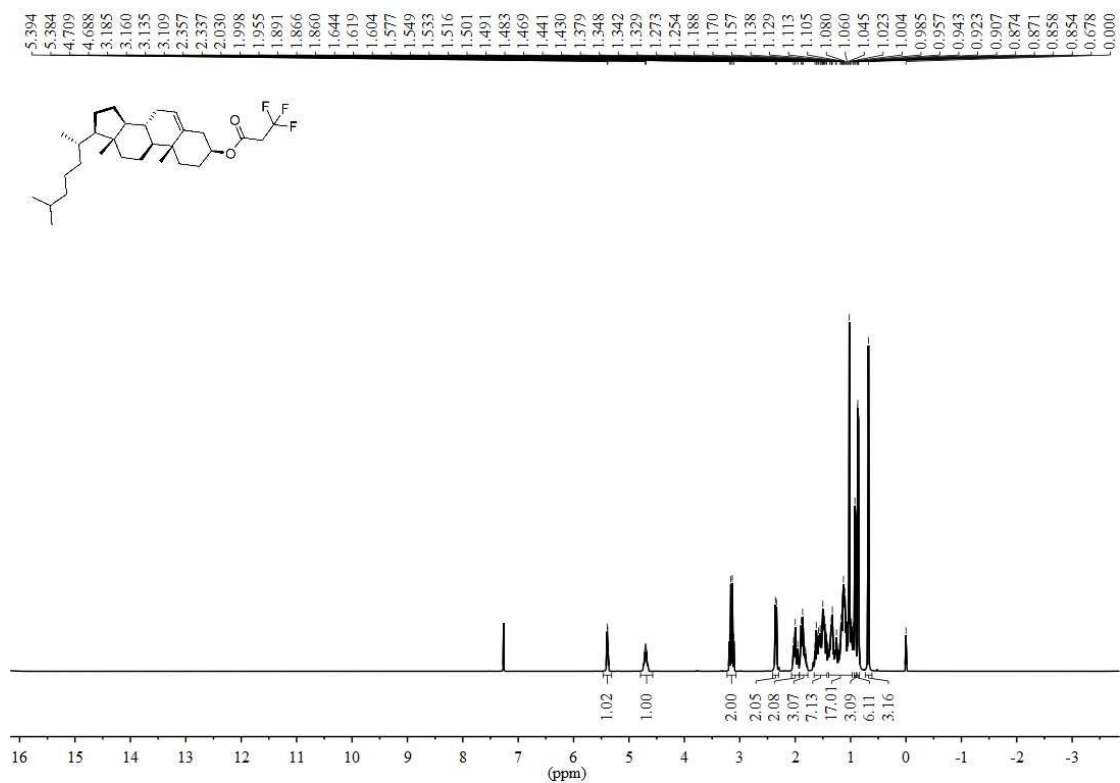

<sup>13</sup>C{<sup>1</sup>H} NMR (100 MHz, CDCl<sub>3</sub>) of compound **3ai**

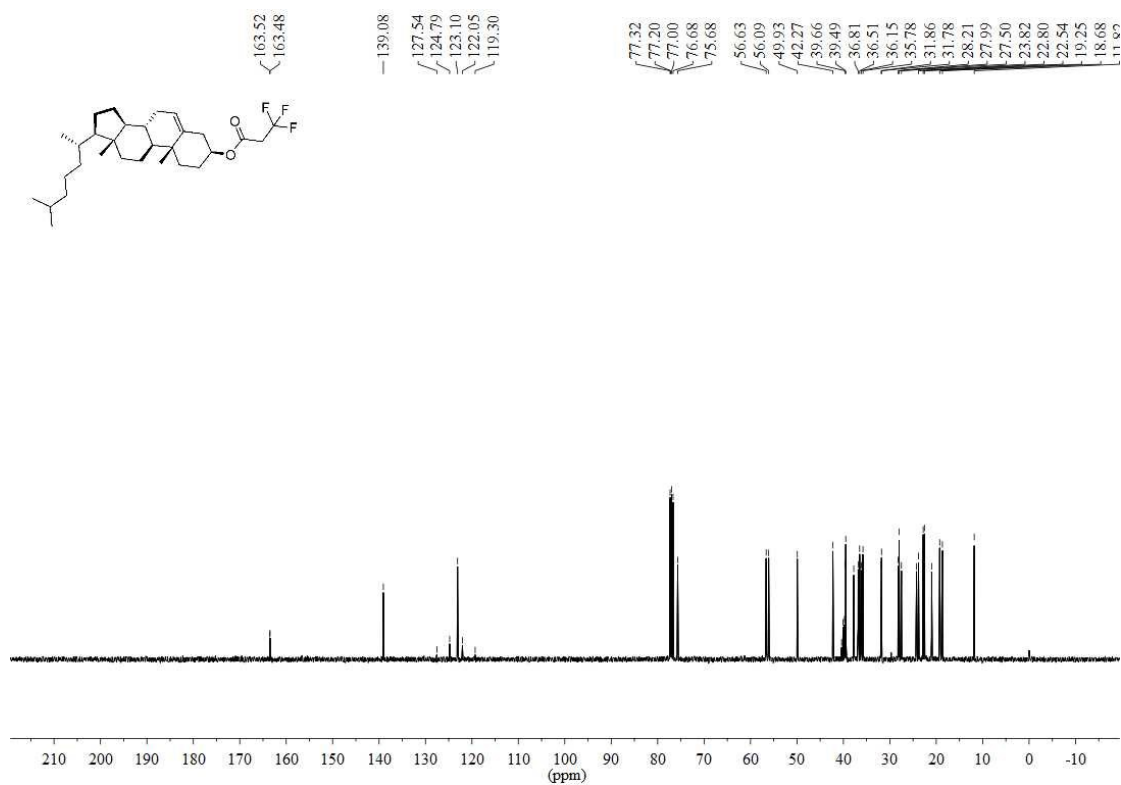

<sup>19</sup>F NMR (376 MHz, CDCl<sub>3</sub>) of compound **3ai**

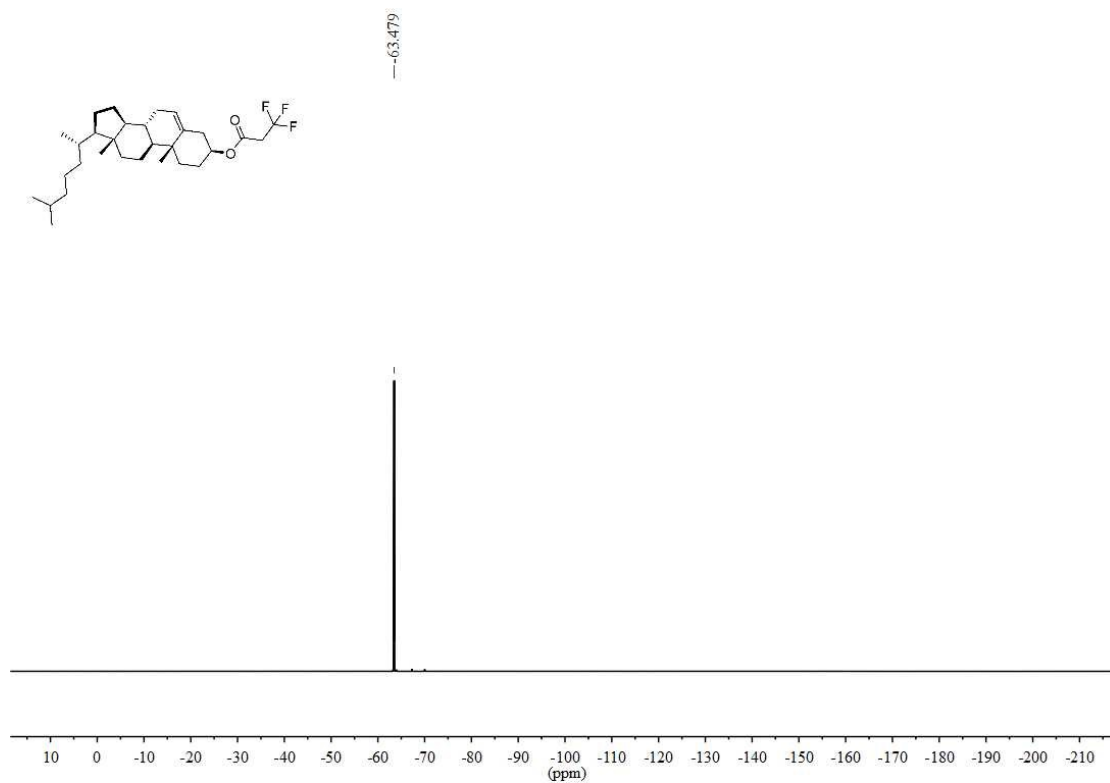

<sup>1</sup>H NMR (400 MHz, CDCl<sub>3</sub>) of compound **3aj**

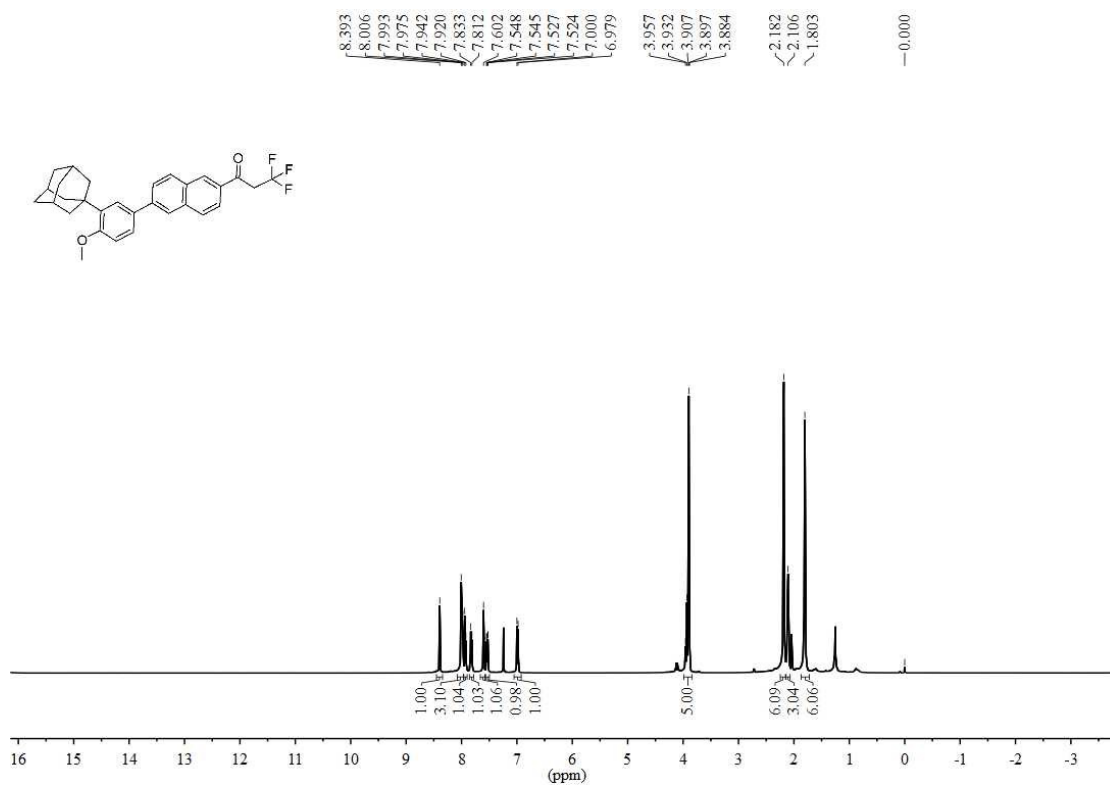

<sup>13</sup>C {<sup>1</sup>H} NMR (100 MHz, CDCl<sub>3</sub>) of compound **3aj**

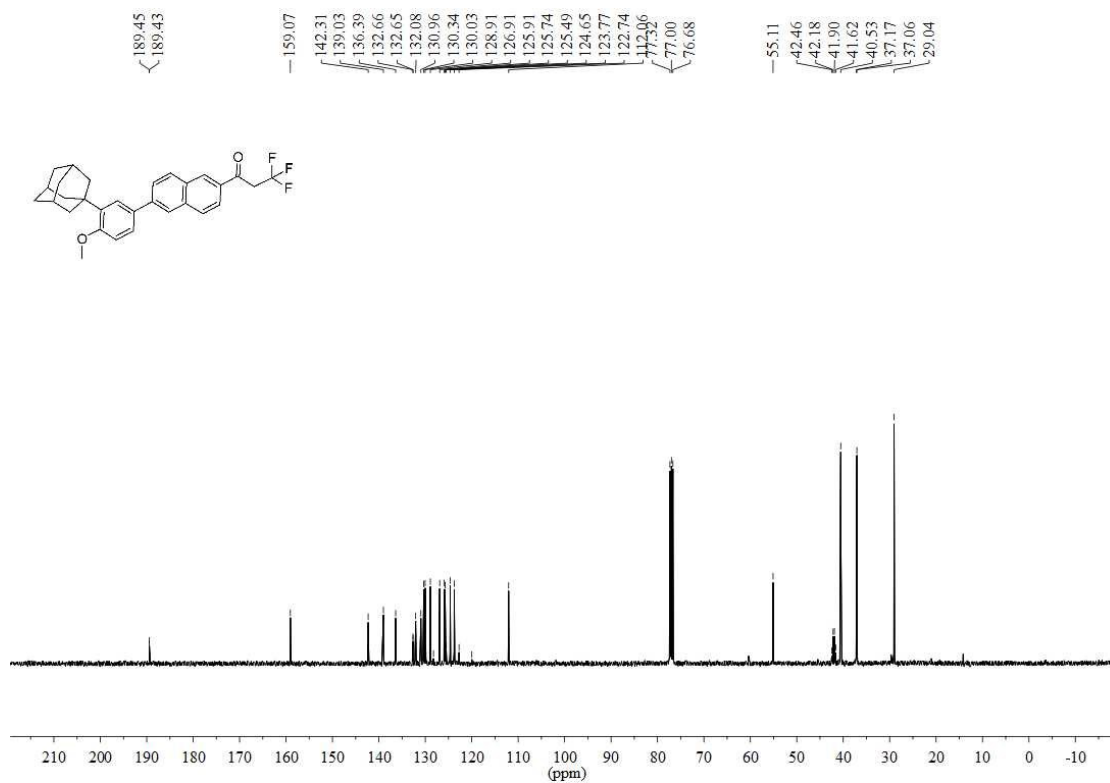

<sup>19</sup>F NMR (376 MHz, CDCl<sub>3</sub>) of compound **3aj**

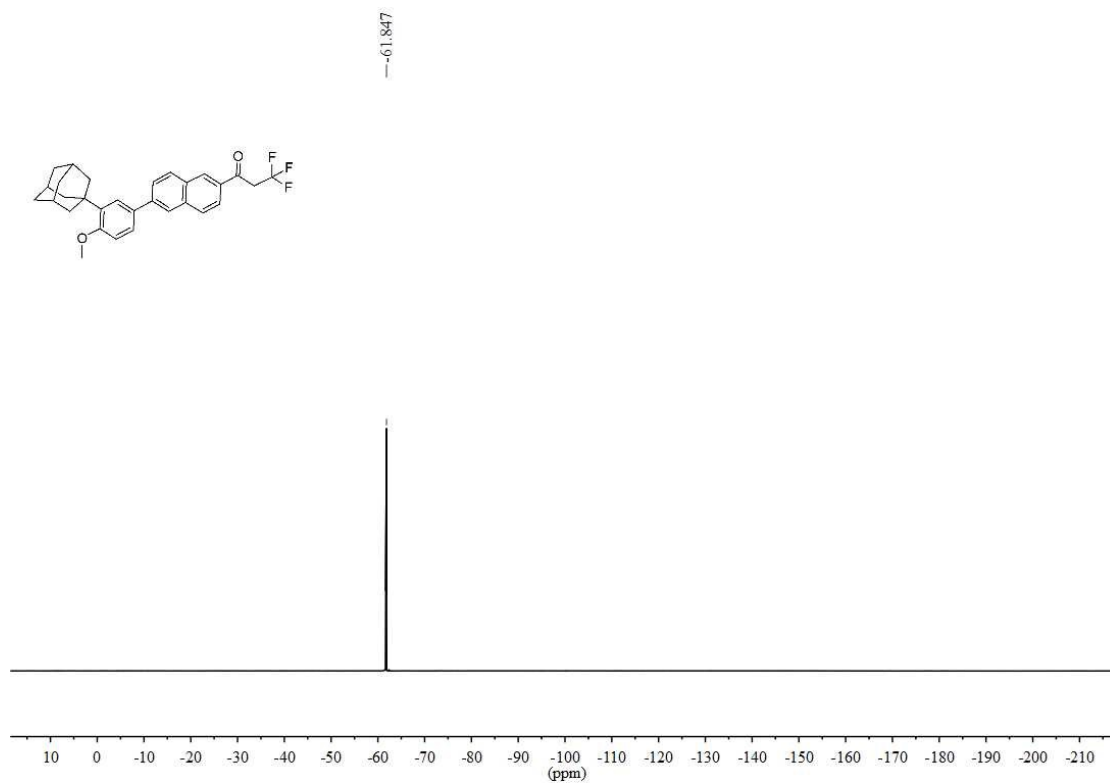

<sup>13</sup>C NMR (400 MHz, CDCl<sub>3</sub>) of compound **11**



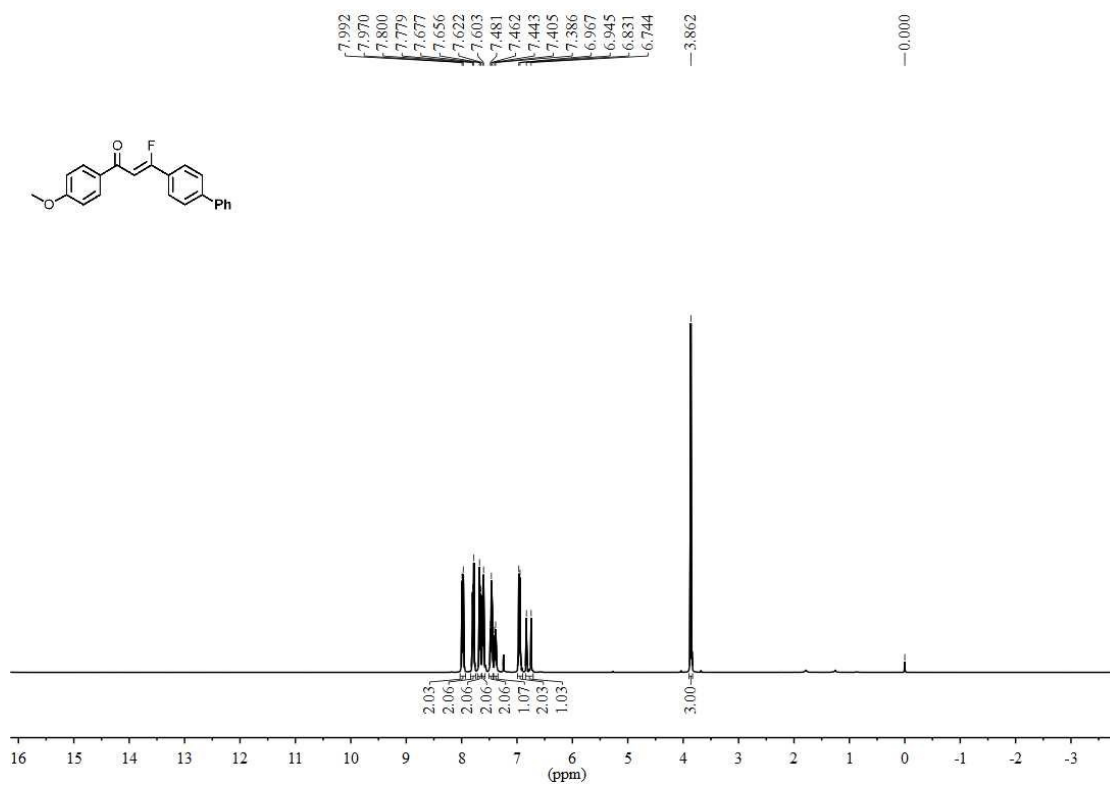

$^{13}\text{C}\{^1\text{H}\}$  NMR (100 MHz,  $\text{CDCl}_3$ ) of compound 11

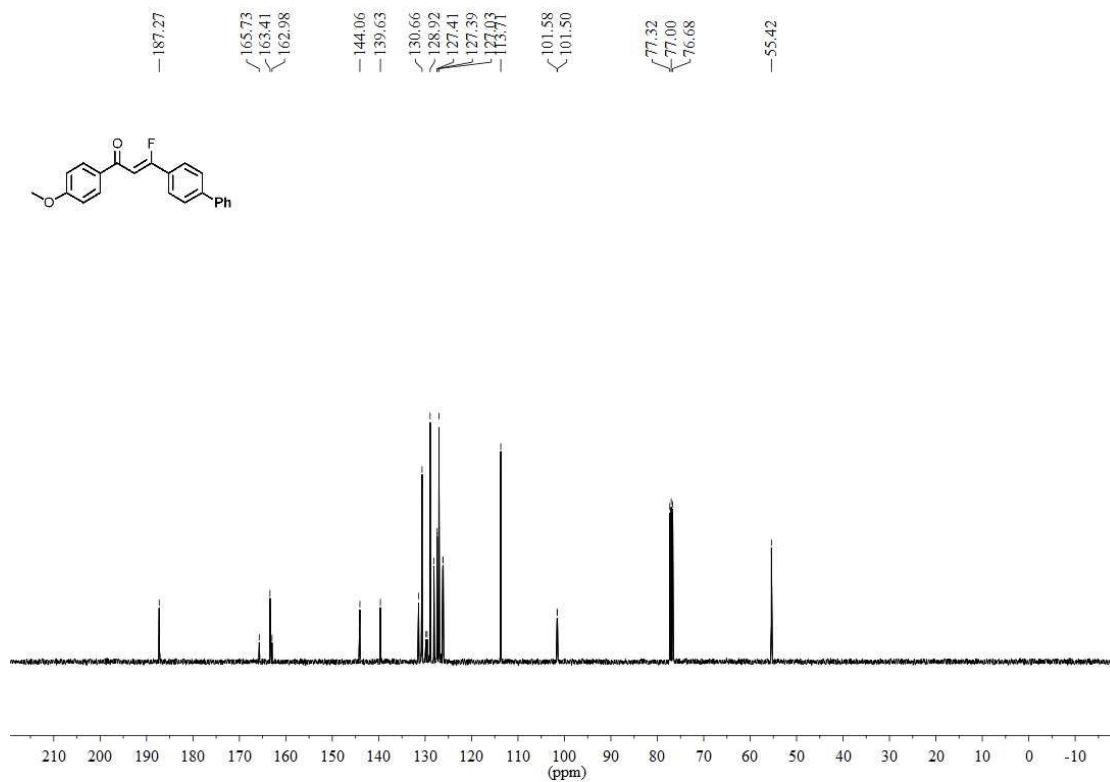

$^{19}\text{F}$  NMR (376 MHz,  $\text{CDCl}_3$ ) of compound 11

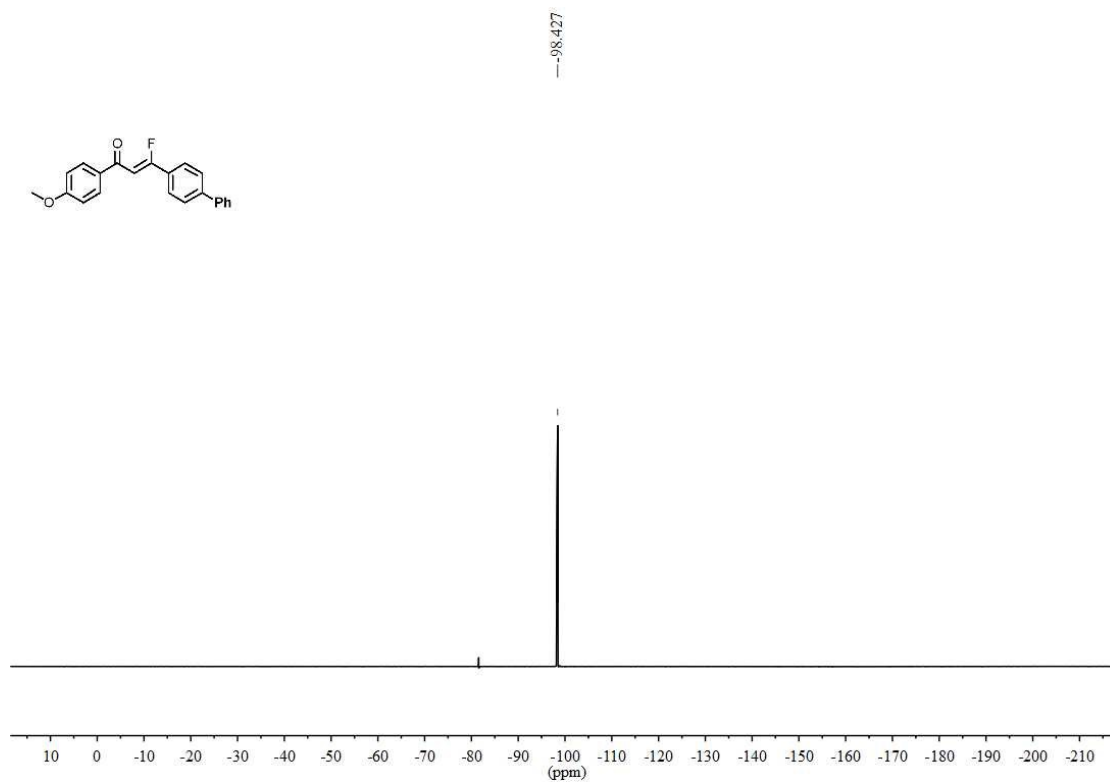

$^1\text{H}$  NMR (400 MHz,  $\text{CDCl}_3$ ) of compound 8

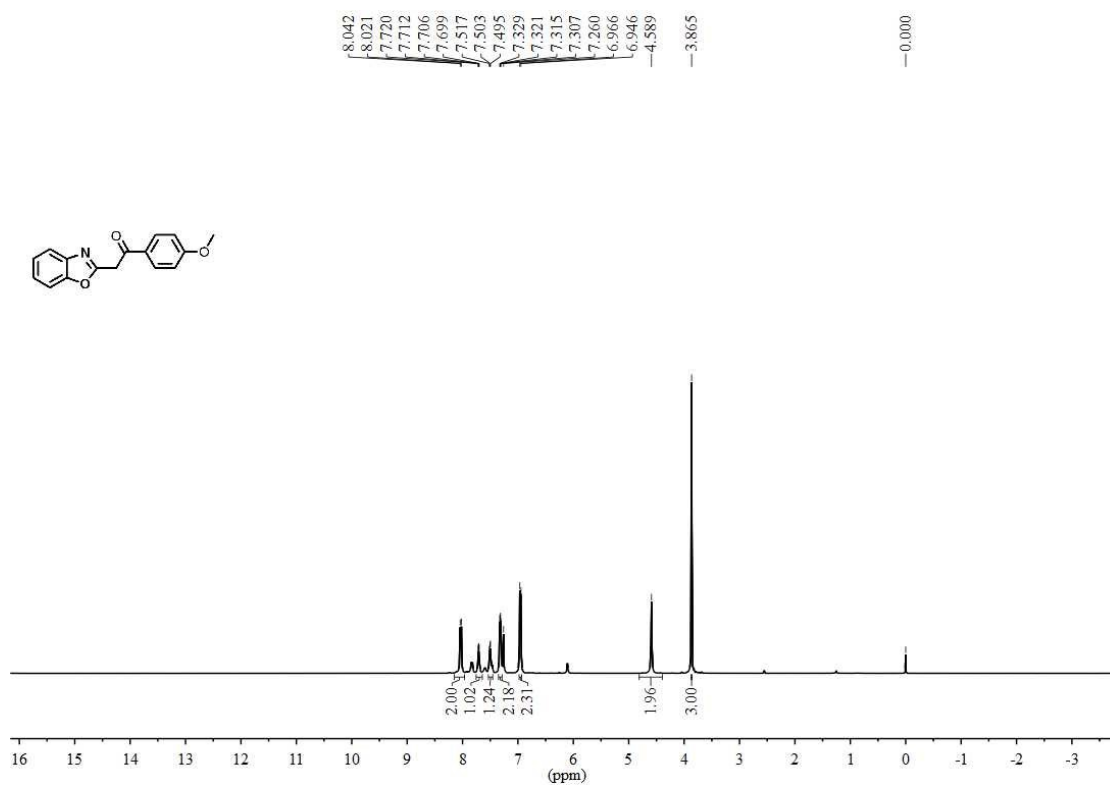

$^{13}\text{C}\{^1\text{H}\}$  NMR (100 MHz,  $\text{CDCl}_3$ ) of compound 8

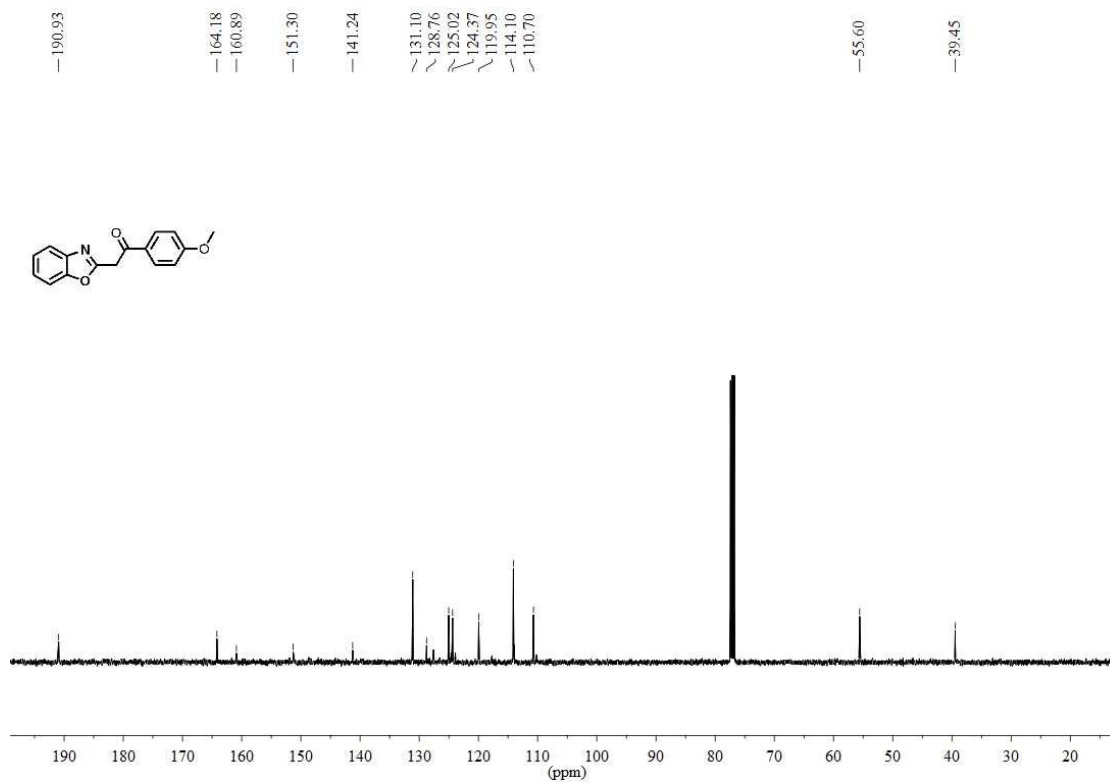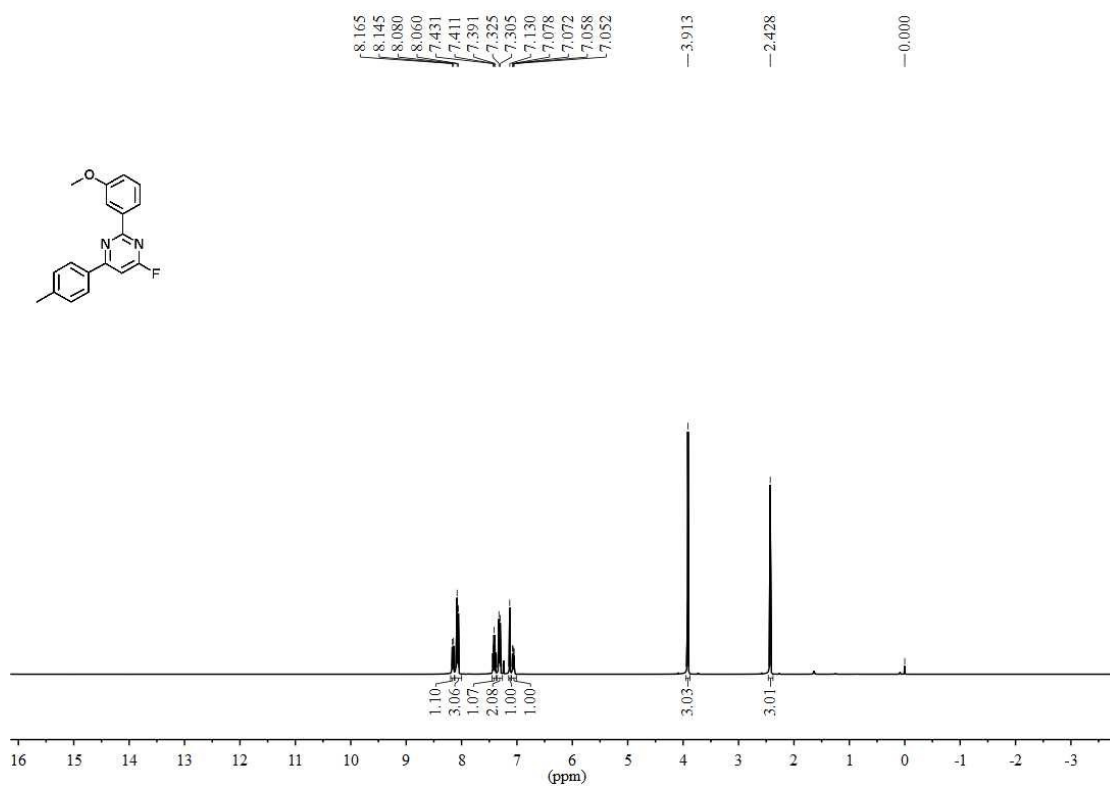

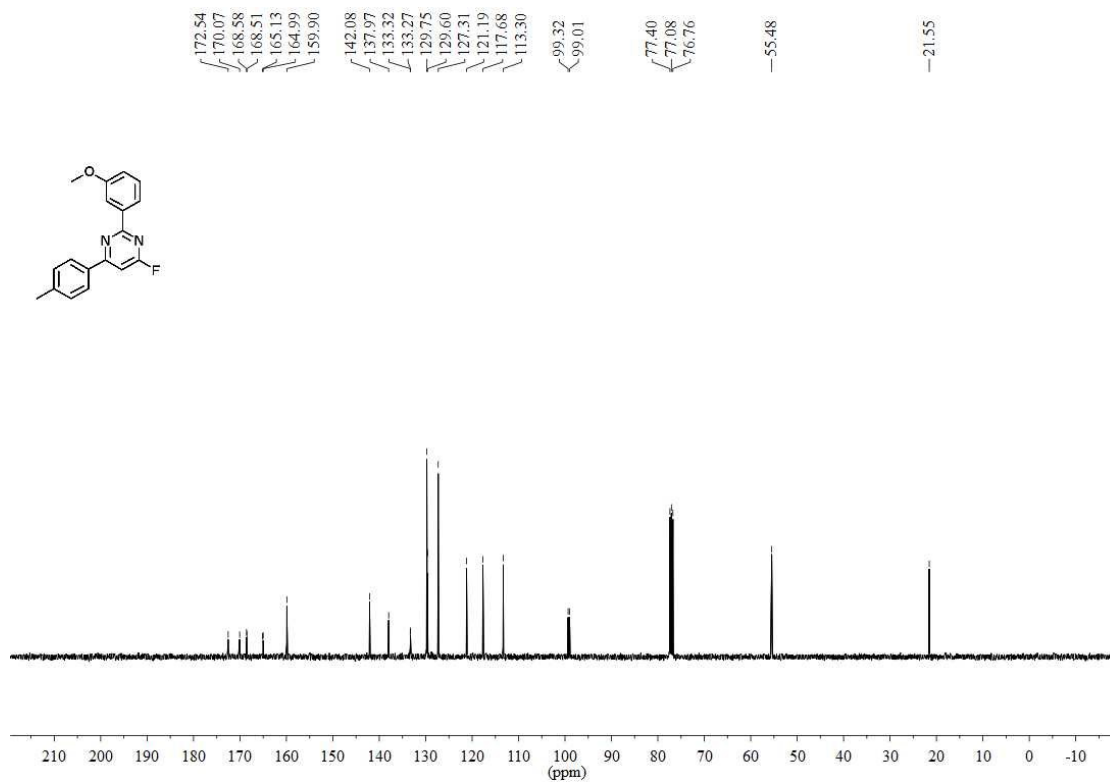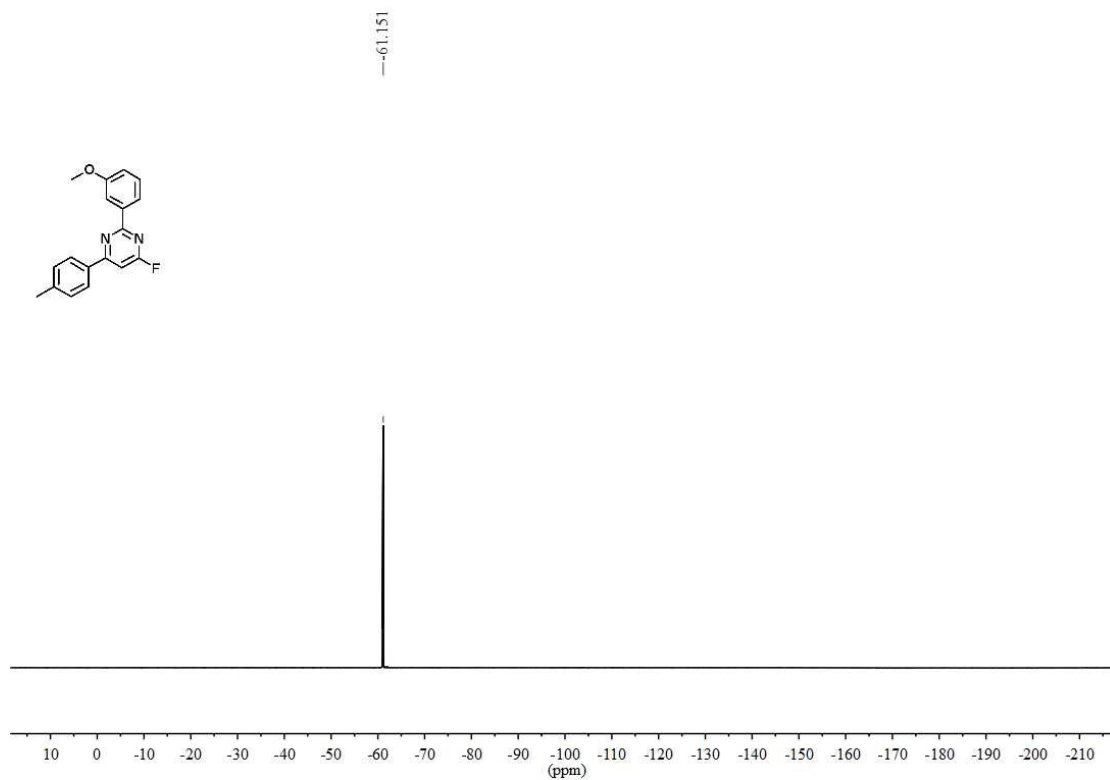

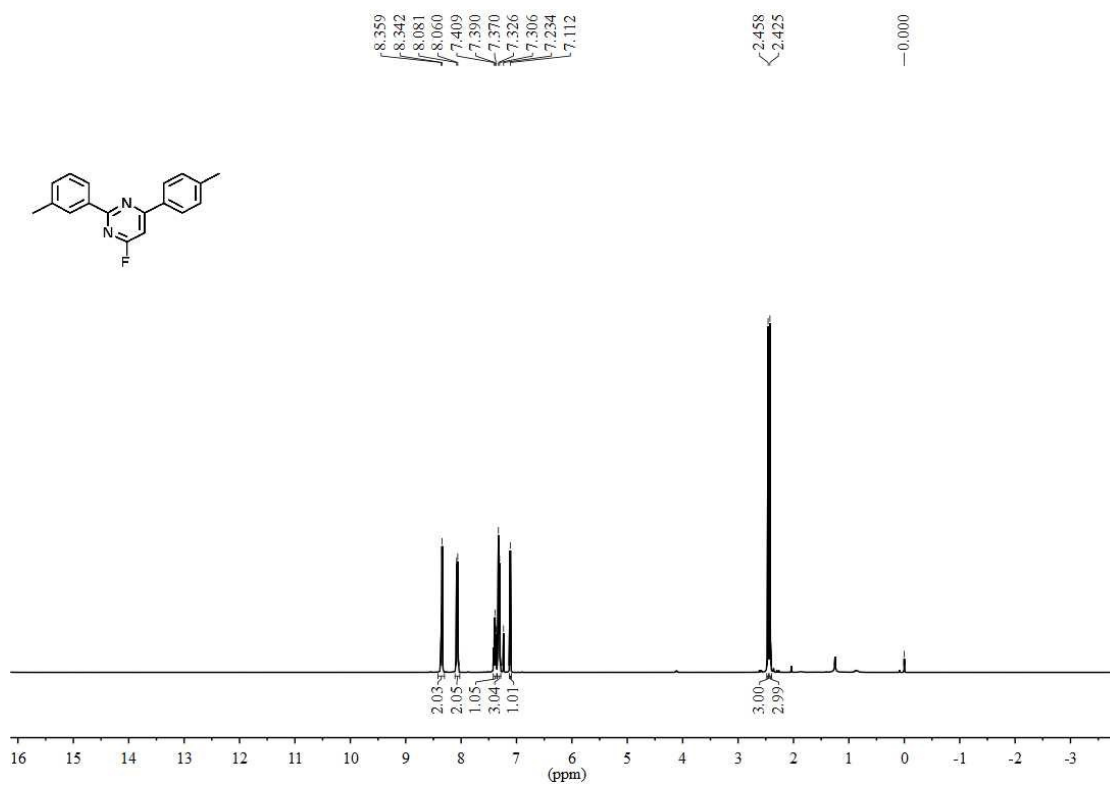

$^{13}\text{C}\{^1\text{H}\}$  NMR (100 MHz,  $\text{CDCl}_3$ ) of compound 9

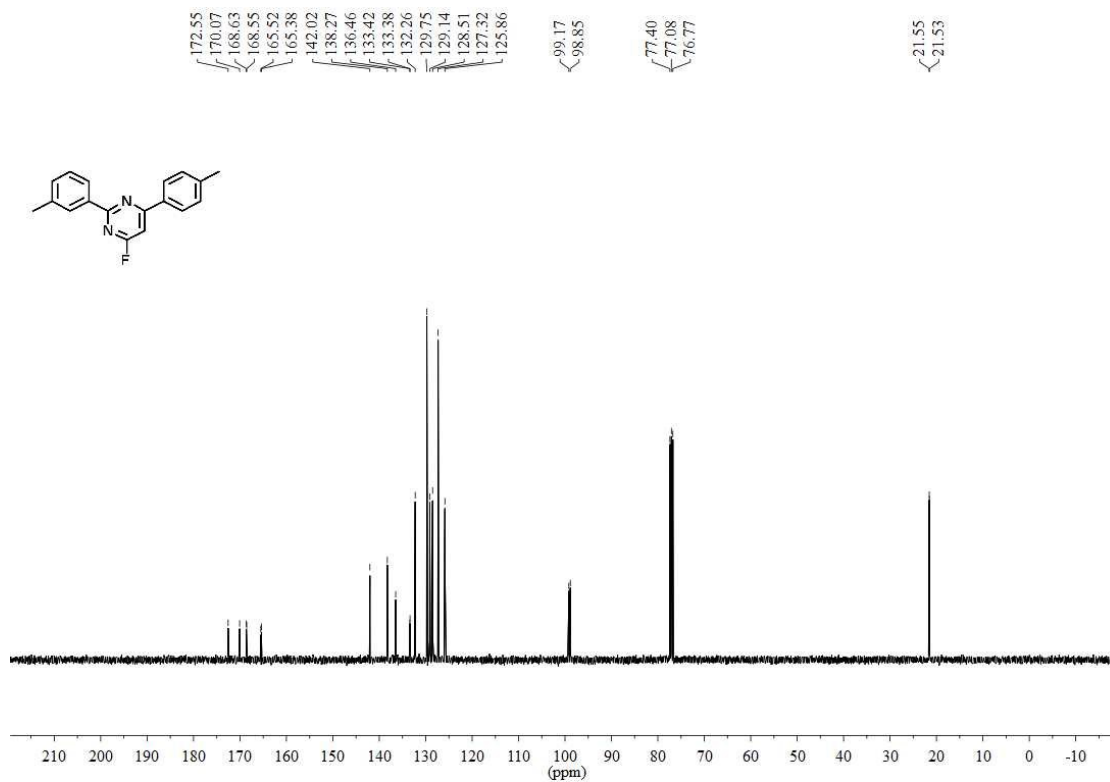

$^{19}\text{F}$  NMR (376 MHz,  $\text{CDCl}_3$ ) of compound 9

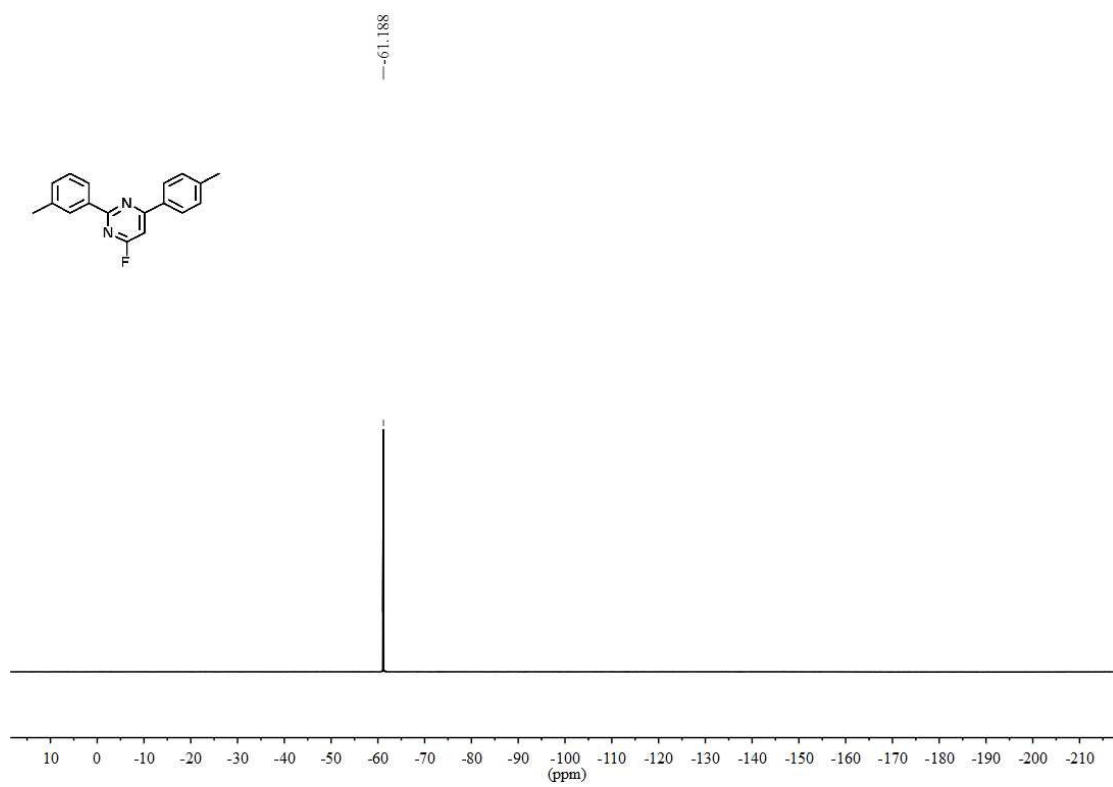

Supplement: d3qo00609c1.pdf [file d3qo00609c1.pdf]
